# Supplementary material for: Enantioselective Organocatalyzed Michael Addition of Isobutyraldehyde to Maleimides in Aqueous Media
Source: MDPI journal article supplement (doi:10.3390/molecules27092759), 2022-04-25
Supplement: s1 [file s1]

# Enantioselective Organocatalyzed Michael Addition of Isobutyraldehydes to Maleimides in Aqueous Media

*Jae Ho Shim*<sup>1,\*</sup>, *Seok Hyun Cheun*<sup>2</sup>, *Hyeon Soo Kim*<sup>1</sup>, and *Deok-Chan Ha*<sup>2</sup>

1. *Department of Anatomy, College of Medicine, Korea University, 73, Goryeodae-ro, Seoul, 0284, Republic of Korea, E-mail: shimjh3000@korea.ac.kr, anatomykim@korea.ac.kr*
2. *Department of Chemistry, College of Science, Korea University, 145 Anam-ro, Seoul 02841, Korea  
E-mail: dechha@korea.ac.kr, eamc2@naver.com*

## Supporting Information

### Table of Contents

|                                                               |              |
|---------------------------------------------------------------|--------------|
| <b>1. Compound Characterization Data.....</b>                 | <b>S-2</b>   |
| <b>2. Copy of HPLC, NMR and MASS Spectra.....</b>             | <b>S-7</b>   |
| <b>3. DFT Calculations for all Calculated Structures.....</b> | <b>S-27</b>  |
| <b>4. Reference.....</b>                                      | <b>S-126</b> |

## 1. Compound Characterization Data

### 1-[(1*R*,2*R*)-2-Amino-1,2-diphenylethyl]-3-[3,5-bis(trifluoromethyl)phenyl]thiourea(1a)

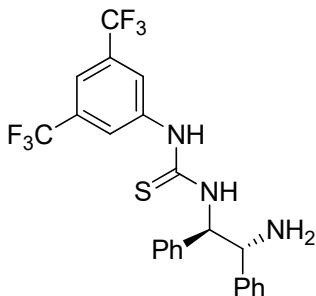

$[\alpha]_D^{25} +13.5$  (*c* 1.0, CH<sub>3</sub>Cl); <sup>1</sup>H NMR (500 MHz, DMSO-*d*<sub>6</sub>)  $\delta$  8.25 (s, 2H), 7.78 (s, 1H), 7.32~7.15 (m, 13H), 5.99 (d, *J* = 3 Hz, 1H), 4.77 (d, *J* = 3 Hz, 1H) ppm; <sup>13</sup>C NMR (125 MHz, DMSO-*d*<sub>6</sub>)  $\delta$  180.5, 143.2, 142.4, 130.8, 130.5, 128.5, 128.2, 127.6, 127.5, 127.3, 124.7, 122.6, 121.3, 116.0, 63.6, 59.9 ppm; IR (KBr) 3305, 3032, 2963, 1652, 1601, 1557, 1383, 1277, 1262, 803, 700 cm<sup>-1</sup>; HRMS (FAB<sup>+</sup>) for C<sub>23</sub>H<sub>19</sub>F<sub>6</sub>N<sub>3</sub>S [M+H]<sup>+</sup> Calcd: 484.1282, Found: 484.1254;

### (*R*)-2-(2,5-Dioxo-1-phenylpyrrolidin-3-yl)-2-methylpropanal (2a)<sup>1,2</sup>

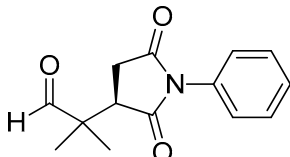

$[\alpha]_D^{25} +6.2$  (*c* 0.2, CH<sub>2</sub>Cl<sub>2</sub>); <sup>1</sup>H NMR (300 MHz, CDCl<sub>3</sub>)  $\delta$  9.51 (s, 1H), 7.26~7.50 (m, 5H), 3.14 (dd, *J* = 6.0, 12 Hz, 1H), 2.96 (dd, *J* = 9.0, 18 Hz, 1H), 2.60 (dd, *J* = 6.0, 12 Hz, 1H), 1.32 (s, 3H), 1.27 (s, 3H) ppm; <sup>13</sup>C NMR (100 MHz, CDCl<sub>3</sub>)  $\delta$  203.0, 177.1, 175.0, 132.0, 129.4, 128.9, 126.7, 48.8, 45.2, 32.1, 20.6, 19.8 ppm; LRMS (EI<sup>+</sup>) Calcd. for [C<sub>14</sub>H<sub>15</sub>NO<sub>3</sub>]<sup>+</sup>: 245, found: 245; HPLC [Chiralcel OD-H, hexane/2-propanol = 75/25, flow rate = 0.7 mL/min,  $\lambda$  = 210nm, retention times: (major) 38.8 min, (minor) 32.3 min].

**(R)-2-(2,5-Dioxopyrrolidin-3-yl)-2-methylpropanal (2b)**<sup>7</sup>

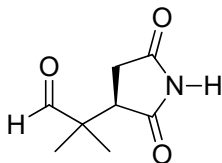

$[\alpha]_D^{21} -9.00$  (*c* 0.2, CH<sub>2</sub>Cl<sub>2</sub>); <sup>1</sup>H NMR (300 MHz, CDCl<sub>3</sub>)  $\delta$  9.49 (s, 1H), 8.57 (br. s, 1H), 3.09 (dd, *J* = 6.0, 9.0 Hz, 1H), 2.85 (dd, *J* = 12, 18 Hz, 1H), 2.51 (dd, *J* = 6.0, 18 Hz, 1H), 1.26 (s, 3H), 1.24 (s, 3H) ppm; <sup>13</sup>C NMR (100 MHz, DMSO)  $\delta$  185.4, 183.3, 182.8, 53.3, 48.8, 38.8, 29.5, 28.4 ppm; LRMS (EI<sup>+</sup>) Calcd. for [C<sub>8</sub>H<sub>11</sub>NO<sub>3</sub>]<sup>+</sup>: 169, found: 169; HPLC [Chiralcel AD-H, hexane/2-propanol = 85/15, flow rate = 0.7 mL/min,  $\lambda$  = 210nm, retention times: (major) 25.3 min, (minor) 33.7 min].

**(R)-2-(2,5-Dioxo-1-p-tolylpyrrolidin-3-yl)-2-methylpropanal (2c)**<sup>7</sup>

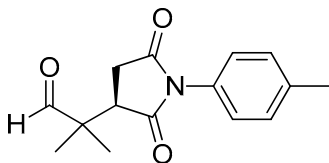

$[\alpha]_D^{21} -6.5$  (*c* 0.2, CH<sub>2</sub>Cl<sub>2</sub>); <sup>1</sup>H NMR (300 MHz, CDCl<sub>3</sub>)  $\delta$  9.52 (s, 1H), 7.26 (t, 3H), 7.15 (d, *J* = 9.0 Hz, 2H), 3.14 (dd, *J* = 6.0, 9.0 Hz, 1H), 2.96 (dd, *J* = 9.0, 18 Hz, 1H), 2.56~2.64 (dd, *J* = 6.0, 18 Hz, 1H), 2.37 (s, 3H), 1.31 (s, 3H), 1.28 (s, 3H) ppm; <sup>13</sup>C NMR (100 MHz, CDCl<sub>3</sub>)  $\delta$  203.0, 177.2, 175.2, 139.0, 130.1, 129.3, 126.5, 48.7, 45.2, 32.0, 21.4, 20.5, 19.8 ppm; LRMS (EI<sup>+</sup>) Calcd. for [C<sub>15</sub>H<sub>17</sub>NO<sub>3</sub>]<sup>+</sup>: 259, found: 259; HPLC [Chiralcel OD-H, hexane/2-propanol = 75/25, flow rate = 0.6 mL/min,  $\lambda$  = 210nm, retention times: (major) 37.7 min, (minor) 31.3 min].

**(*R*)-2-[1-(4-Bromophenyl)-2,5-dioxopyrrolidin-3-yl]-2-methylpropanal (2d)<sup>3,4</sup>**

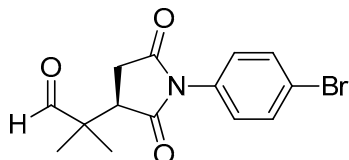

$[\alpha]_D^{20} +5.7$  (*c* 0.2, CH<sub>2</sub>Cl<sub>2</sub>); <sup>1</sup>H NMR (300 MHz, CDCl<sub>3</sub>)  $\delta$  9.48 (s, 1H), 7.60 (d, *J* = 9.0 Hz, 2H), 7.19 (d, *J* = 6.0 Hz, 2H), 3.11 (dd, *J* = 6.0, 9.0 Hz, 1H), 2.97 (dd, *J* = 9.0, 18 Hz, 1H), 2.60 (dd, *J* = 6.0, 18 Hz, 1H), 1.36 (s, 3H), 1.28 (s, 3H) ppm; <sup>13</sup>C NMR (100 MHz, CDCl<sub>3</sub>)  $\delta$  203.0, 176.8, 174.6, 132.6, 131.0, 128.3, 122.8, 48.9, 45.1, 32.2, 20.7, 20.1 ppm; LRMS (EI<sup>+</sup>) Calcd. for [C<sub>14</sub>H<sub>14</sub>BrNO<sub>3</sub>]<sup>+</sup>: 323, found: 323; HPLC [Chiralcel OD-H, hexane/2-propanol = 75/25, flow rate = 0.6 mL/min,  $\lambda$  = 210nm, retention times: (major) 58.6 min, (minor) 31.5 min].

**(*R*)-2-[1-(4-Nitrophenyl)-2,5-dioxopyrrolidin-3-yl]-2-methylpropanal (2e)<sup>1</sup>**

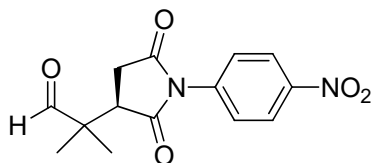

$[\alpha]_D^{20} +2.7$  (*c* 0.1, CH<sub>2</sub>Cl<sub>2</sub>); <sup>1</sup>H NMR (300 MHz, CDCl<sub>3</sub>)  $\delta$  9.47 (s, 1H), 8.33 (d, *J* = 9.0 Hz, 2H), 7.58 (d, *J* = 9.0 Hz, 2H), 3.13 (dd, *J* = 6.0, 12 Hz, 1H), 3.02 (dd, *J* = 12, 18 Hz, 1H), 2.68 (dd, *J* = 6.0, 18 Hz, 1H), 1.42 (s, 3H), 1.31 (s, 3H) ppm; <sup>13</sup>C NMR (100 MHz, CDCl<sub>3</sub>)  $\delta$  203.0, 176.5, 174.1, 147.2, 137.6, 127.3, 124.6, 49.2, 45.2, 32.4, 21.0, 20.5 ppm; LRMS (EI<sup>+</sup>) Calcd. for [C<sub>14</sub>H<sub>14</sub>N<sub>2</sub>O<sub>5</sub>]<sup>+</sup>: 290, found: 290; HPLC [Chiralcel OD-H, hexane/2-propanol = 80/20, flow rate = 1.0 mL/min,  $\lambda$  = 210nm, retention times: (major) 72.6 min, (minor) 44.4 min].

**(R)-1-(2,5-Dioxo-1-phenylpyrrolidin-3-yl)cyclohexanecarbaldehyde (2f)**<sup>1,5</sup>

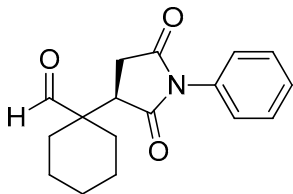

$[\alpha]_D^{20} +5.2$  (*c* 0.1, CH<sub>2</sub>Cl<sub>2</sub>); <sup>1</sup>H NMR (300 MHz, CDCl<sub>3</sub>)  $\delta$  9.54 (s, 1H), 7.26~7.50 (m, 5H), 3.25 (dd, *J* = 6.0, 9.0 Hz, 1H), 2.88 (dd, *J* = 9.0, 18 Hz, 1H), 2.67 (dd, *J* = 6.0, 18 Hz, 1H), 1.82~2.04 (m, 3H), 1.53~1.64 (m, 7H) ppm; <sup>13</sup>C NMR (100 MHz, CDCl<sub>3</sub>)  $\delta$  204.9, 177.4, 175.2, 132.3, 129.5, 129.0, 127.0, 52.6, 43.0, 31.9, 29.0, 28.5, 25.5, 21.8, 21.6 ppm; LRMS (FAB<sup>+</sup>) Calcd. for [C<sub>17</sub>H<sub>19</sub>NO<sub>3</sub>]<sup>+</sup>: 285, found: 285; HPLC [Chiralcel OD-H, hexane/2-propanol = 75/25, flow rate = 1.0 mL/min,  $\lambda$  = 210nm, retention times: (major) 53.2 min, (minor) 42.4 min].

**(R)-2-(3-Oxo-2-oxaspiro[4.5]decan-4-yl)-N-phenylacetamide (3a)**<sup>6</sup>

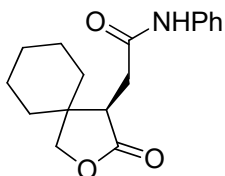

$[\alpha]_D^{20} -4.2$  (*c* 0.1, CH<sub>2</sub>Cl<sub>2</sub>); <sup>1</sup>H NMR (300 MHz, CDCl<sub>3</sub>)  $\delta$  8.78 (s, 1H), 7.55 (d, *J* = 6.0, Hz, 2H), 7.32 (t, *J* = 6.0 Hz, 2H), 7.10 (t, *J* = 9.0 Hz, 1H), 3.85 (m, 1H), 3.54 (m, 1H), 3.06 (dd, *J* = 3.0, 9.0 Hz, 1H), 2.59 (dd, *J* = 9.0, 15 Hz, 1H), 2.29 (dd, *J* = 3.0, 15 Hz, 1H), 1.60 (m, 4H), 1.39 (m, 4H), 1.25 (m, 2H) ppm; <sup>13</sup>C NMR (100 MHz, CDCl<sub>3</sub>)  $\delta$  180.2, 170.0, 138.9, 129.5, 124.7, 120.5, 70.3, 47.3, 46.1, 33.2, 32.0, 28.9, 25.8, 23.1, 19.9 ppm; LRMS (FAB<sup>+</sup>) Calcd. for [C<sub>17</sub>H<sub>21</sub>NO<sub>3</sub>]<sup>+</sup>: 287, found: 287; HPLC [Chiralcel OD-H, hexane/2-propanol = 90/10, flow rate = 1.0 mL/min,  $\lambda$  = 254nm, retention times: (major) 9.9 min, (minor) 14.9 min].

## 2. Copy of HPLC, NMR and MASS Spectra

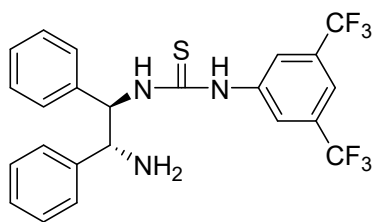

**1a**

### <sup>1</sup>H NMR

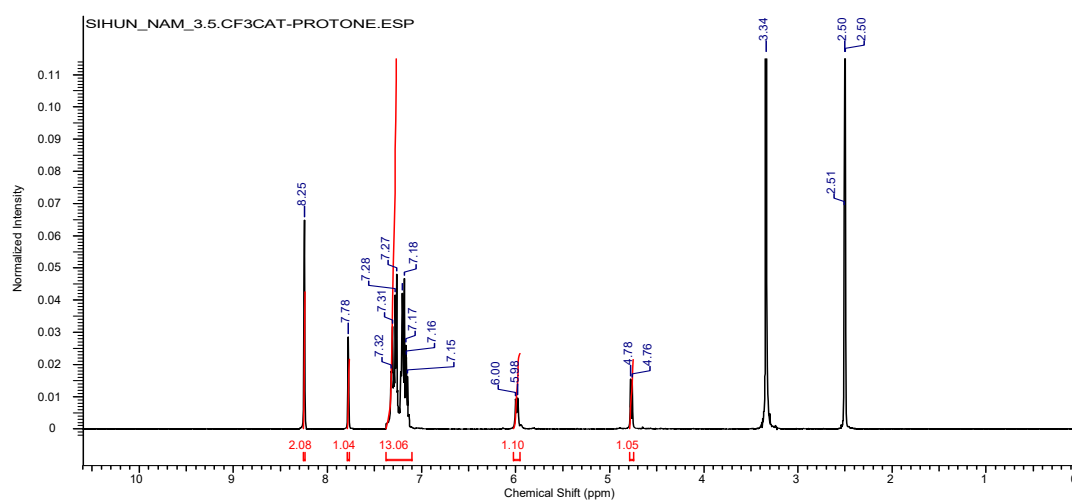

### <sup>13</sup>C NMR

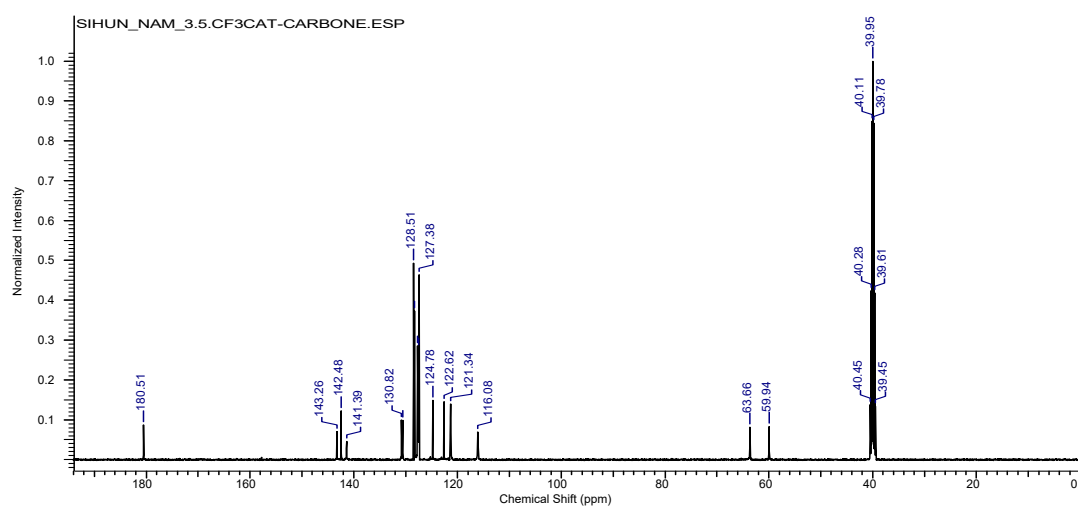

**Table 1.**

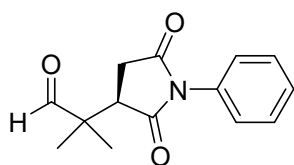

**2a**

Racemic

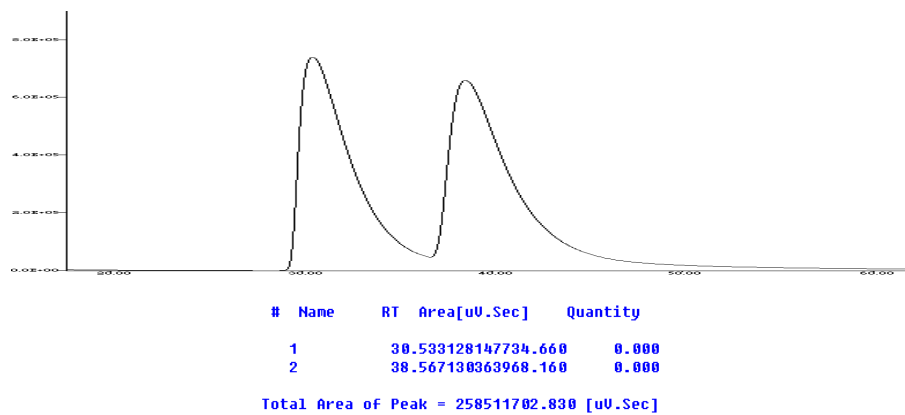

**Table 1, entry 1**

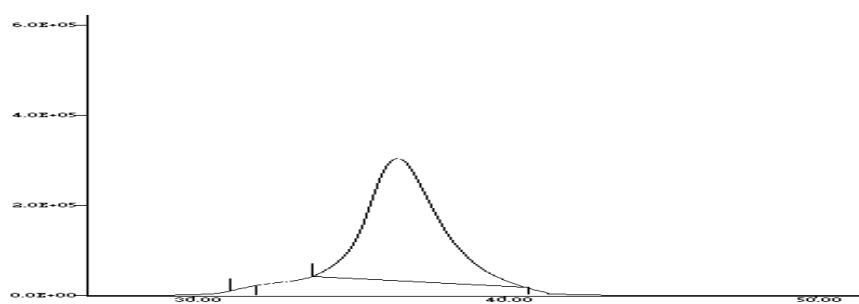

| # | Name | RT     | Area[uV.Sec] | Quantity |
|---|------|--------|--------------|----------|
| 1 |      | 32.017 | 2618451.000  | 0.000    |
| 2 |      | 36.525 | 46704778.000 | 0.000    |

Total Area of Peak = 49323229.000 [uV.Sec]

**Table 1, entry 2**

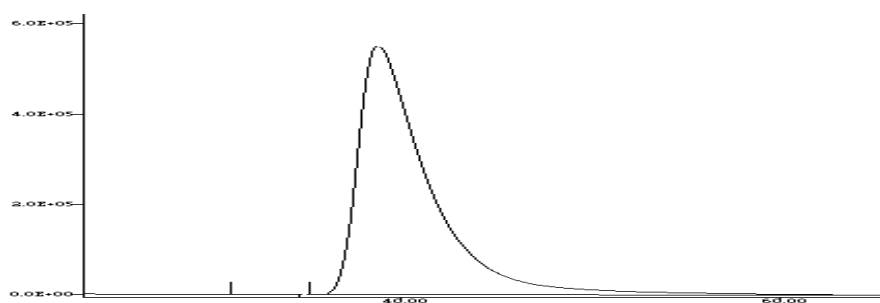

| # | Name | RT                  | Area[uV.Sec] | Quantity |
|---|------|---------------------|--------------|----------|
| 1 |      | 32.308              | 116686.528   | 0.000    |
| 2 |      | 38.767139045145.770 |              | 0.000    |

Total Area of Peak = 139161832.300 [uV.Sec]

**Table 1, entry 3**



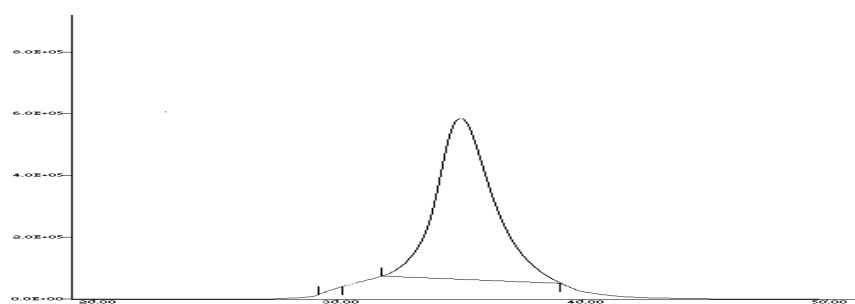

| # | Name | RT     | Area[uV.Sec] | Quantity |
|---|------|--------|--------------|----------|
| 1 |      | 30.208 | 4499914.000  | 0.000    |
| 2 |      | 34.992 | 93686806.678 | 0.000    |

Total Area of Peak = 98186720.678 [uV.Sec]

**Table 1, entry 4**

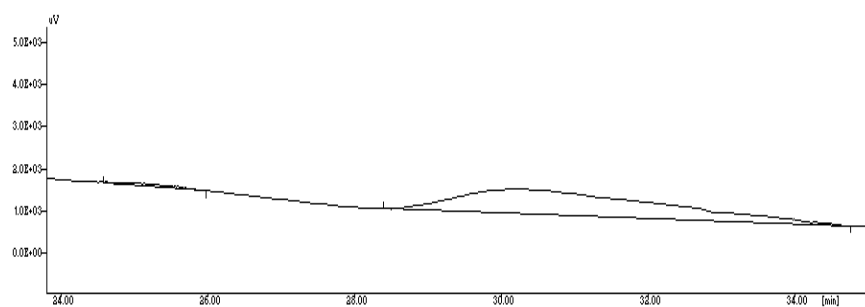

| # | Name | RT     | Area[uV.Sec] | Quantity |
|---|------|--------|--------------|----------|
| 1 |      | 24.608 | 2552.000     | 0.000    |
| 2 |      | 30.225 | 113965.381   | 0.000    |

Table 1, entry 5

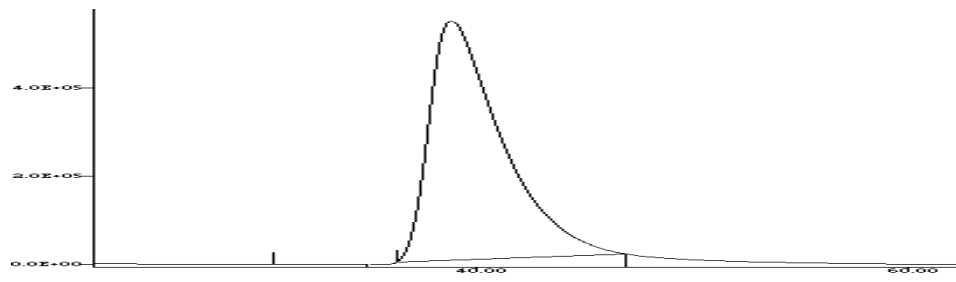

| # | Name | RT                  | Area[uV.Sec] | Quantity |
|---|------|---------------------|--------------|----------|
| 1 |      | 32.308              | 151709.253   | 0.000    |
| 2 |      | 38.767127118381.700 |              | 0.000    |

Total Area of Peak = 127270090.950 [uV.Sec]

Table 1, entry 6

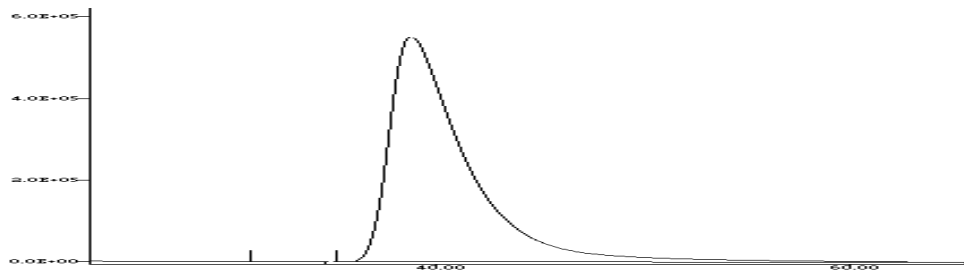

| # | Name | RT                  | Area[uV.Sec] | Quantity |
|---|------|---------------------|--------------|----------|
| 1 |      | 32.308              | 116686.528   | 0.000    |
| 2 |      | 38.767139045145.770 |              | 0.000    |

Total Area of Peak = 139161832.300 [uV.Sec]

Table 1, entry 7

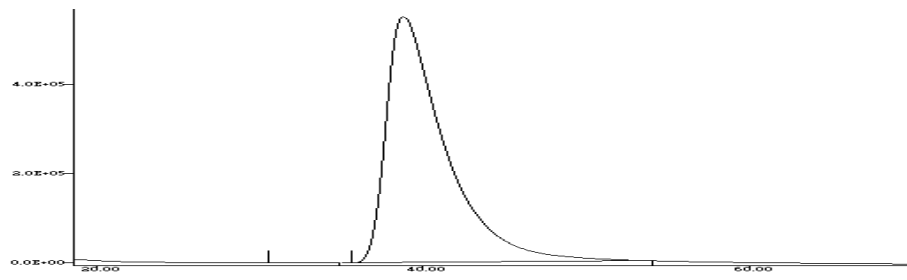

| # | Name | RT                  | Area[uV.Sec] | Quantity |
|---|------|---------------------|--------------|----------|
| 1 |      | 32.308              | 151709.253   | 0.000    |
| 2 |      | 38.767134498855.210 |              | 0.000    |

Total Area of Peak = 134650564.460 [uV.Sec]

Table 1, entry 8

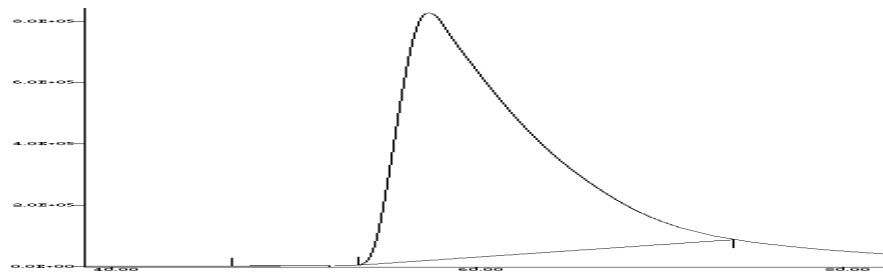

| # | Name | RT                  | Area[uV.Sec] | Quantity |
|---|------|---------------------|--------------|----------|
| 1 |      | 49.375              | 191950.470   | 0.000    |
| 2 |      | 57.308384251931.500 |              | 0.000    |

Total Area of Peak = 384443881.970 [uV.Sec]

# <sup>1</sup>H NMR

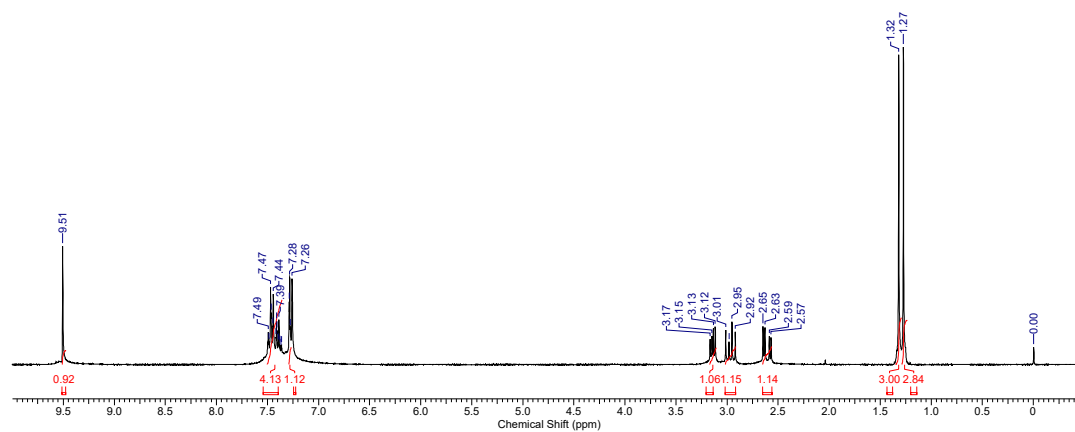

# <sup>13</sup>C NMR

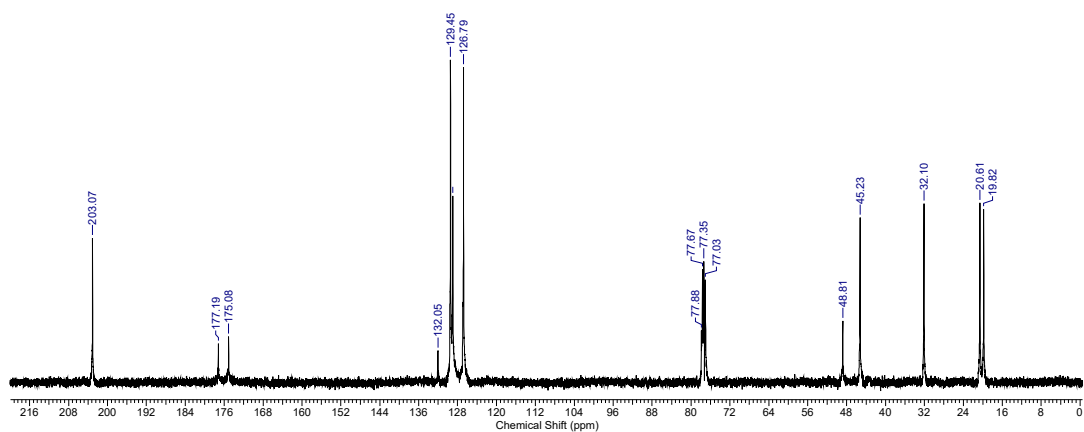

## Mass

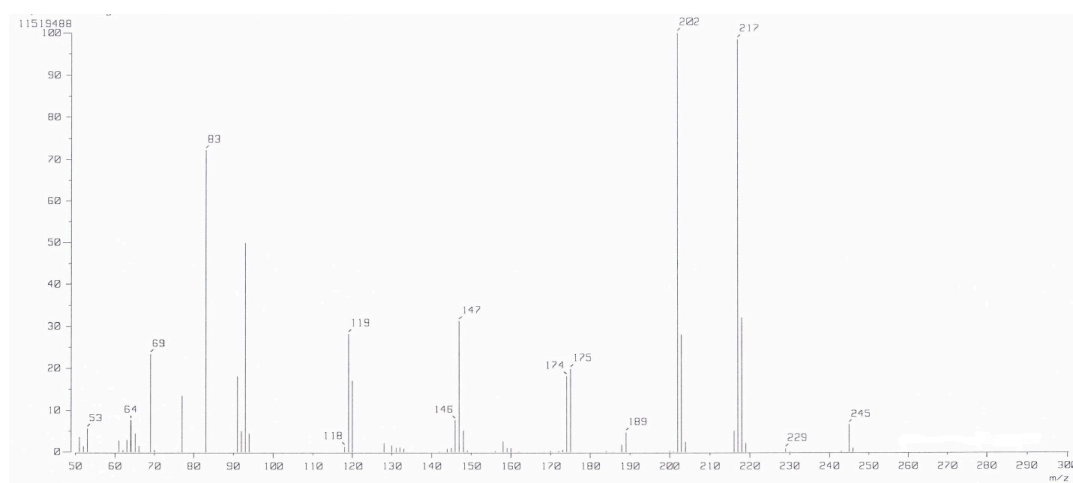

## Table 2, entry 1

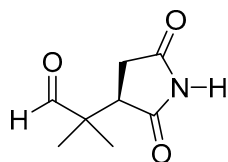

**2b**

Racemic

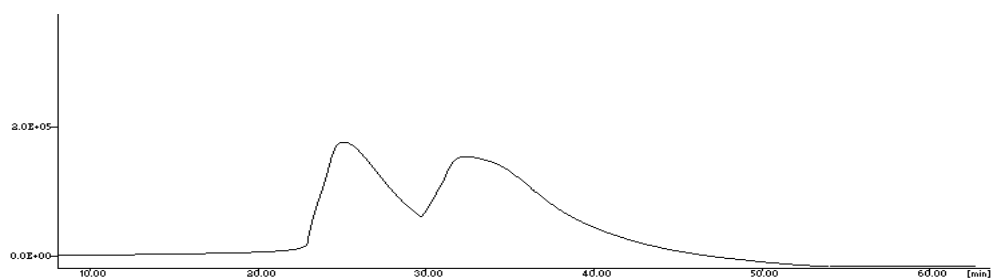

| #                                          | Name | RT     | Area[uV.Sec] | Quantity |
|--------------------------------------------|------|--------|--------------|----------|
| 1                                          |      | 25.008 | 36453687.573 | 0.000    |
| 2                                          |      | 32.308 | 34838408.000 | 0.000    |
| Total Area of Peak = 71292095.573 [uV.Sec] |      |        |              |          |

## Asymmetric

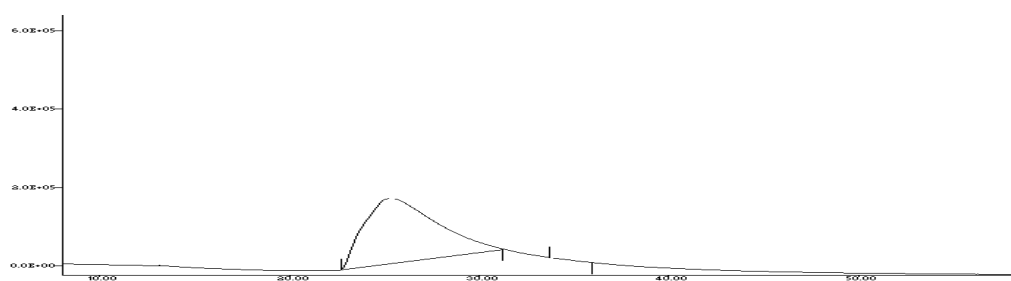

| #                                          | Name | RT     | Area[uV.Sec] | Quantity |
|--------------------------------------------|------|--------|--------------|----------|
| 1                                          |      | 25.300 | 43443193.250 | 0.000    |
| 2                                          |      | 33.742 | 1792571.000  | 0.000    |
| Total Area of Peak = 45235764.250 [uV.Sec] |      |        |              |          |

## <sup>1</sup>H NMR

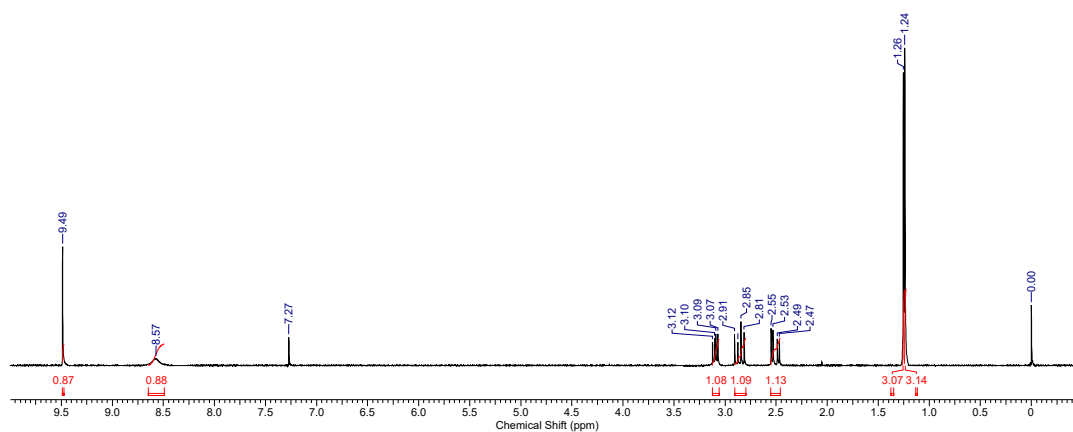

<sup>13</sup>C NMR

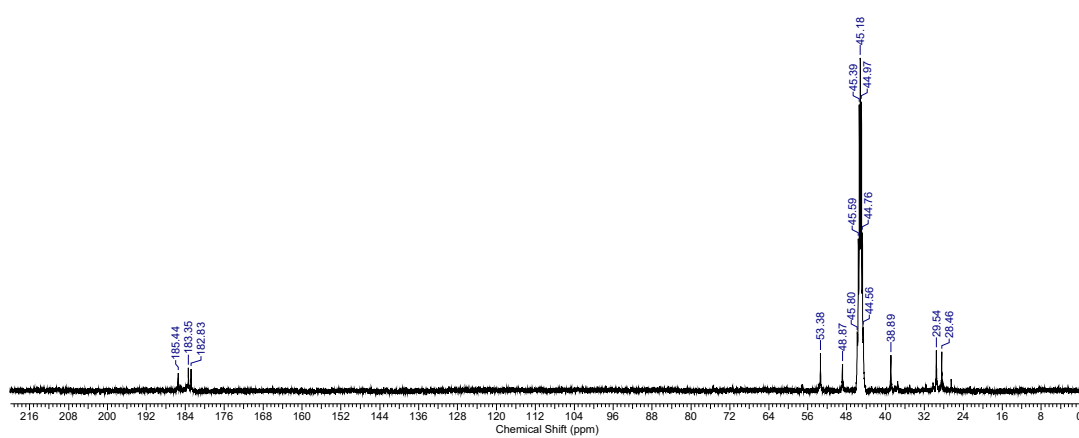

Mass

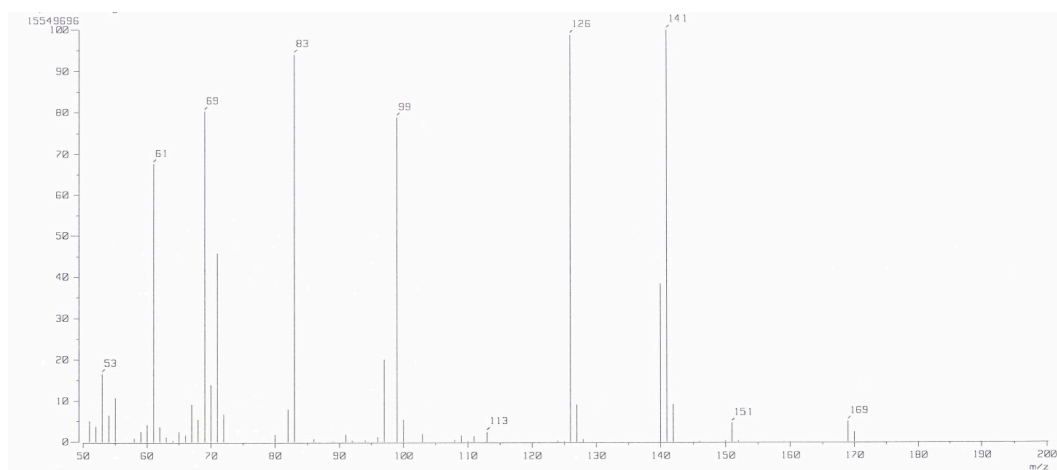

Table 2, entry 2

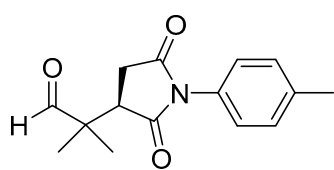

**2c**

Racemic

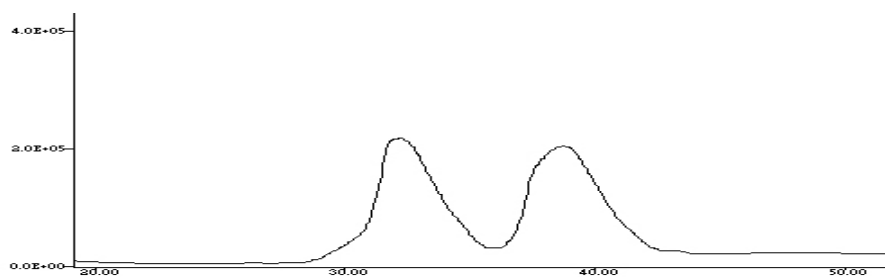

| # | Name | RT     | Area[uV.Sec] | Quantity |
|---|------|--------|--------------|----------|
| 1 |      | 31.358 | 48994375.583 | 0.000    |
| 2 |      | 38.958 | 52721832.569 | 0.000    |

Total Area of Peak = 101716208.070 [uV.Sec]

Asymmetric

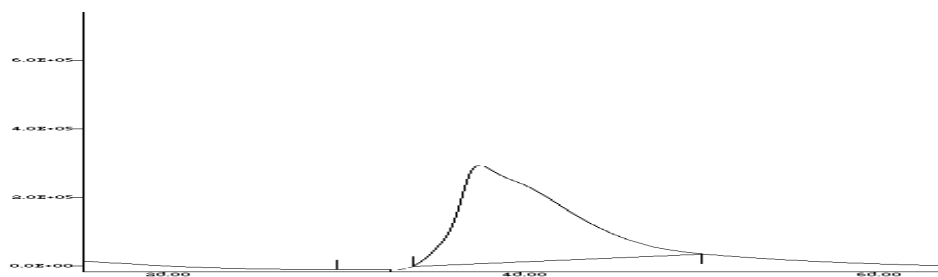

| # | Name | RT                  | Area[uV.Sec] | Quantity |
|---|------|---------------------|--------------|----------|
| 1 |      | 31.292              | 37762.205    | 0.000    |
| 2 |      | 37.742114516169.000 |              | 0.000    |

Total Area of Peak = 114553931.210 [uV.Sec]

**<sup>1</sup>H NMR**



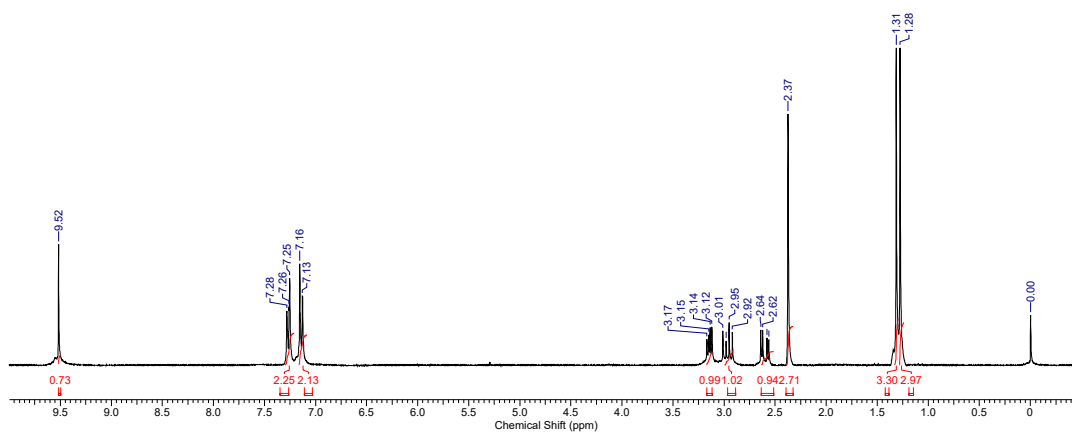

### <sup>13</sup>C NMR

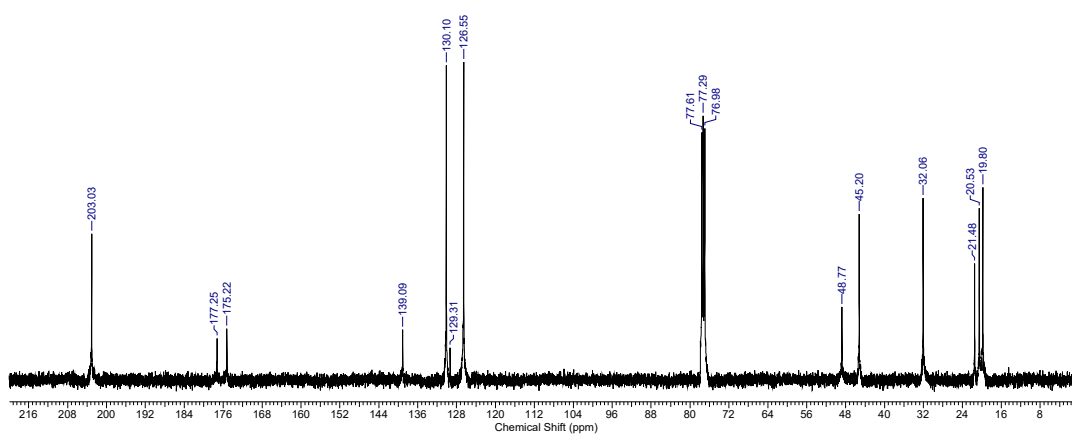

### Mass

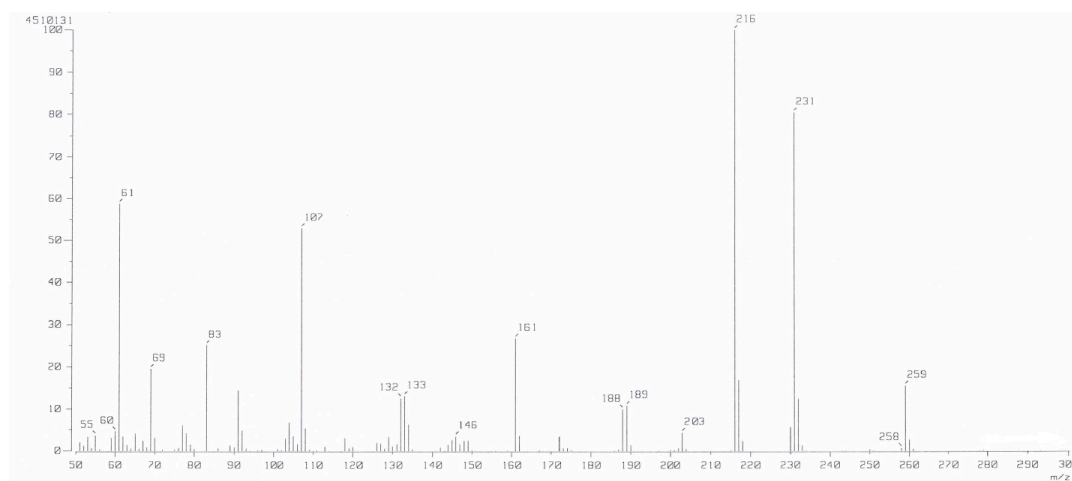

### Table 2, entry 3

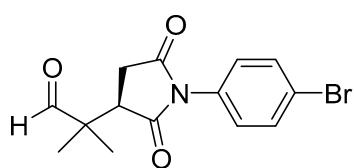

**2d**

Racemic

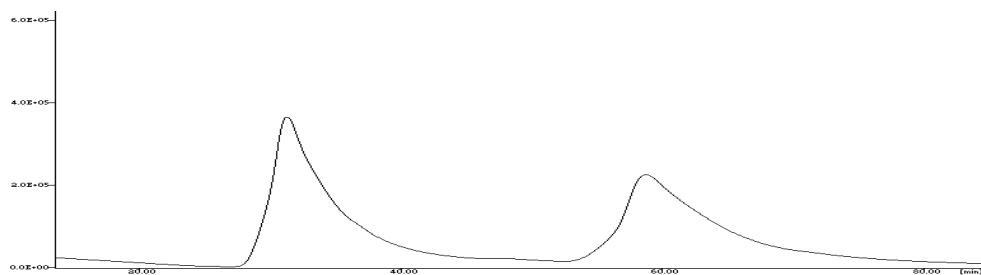

| #                                           | Name | RT     | Area[uV.Sec] | Quantity |
|---------------------------------------------|------|--------|--------------|----------|
| 1                                           |      | 31.242 | 86766751.250 | 0.000    |
| 2                                           |      | 58.717 | 93286295.875 | 0.000    |
| Total Area of Peak = 180053047.130 [uV.Sec] |      |        |              |          |

Asymmetric

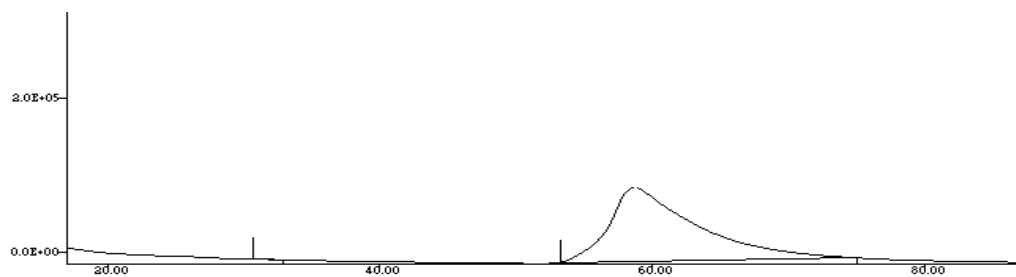

| #                                          | Name | RT     | Area[uV.Sec] | Quantity |
|--------------------------------------------|------|--------|--------------|----------|
| 1                                          |      | 31.467 | 34118.000    | 0.000    |
| 2                                          |      | 58.600 | 41605038.775 | 0.000    |
| Total Area of Peak = 41639156.775 [uV.Sec] |      |        |              |          |

**<sup>1</sup>H NMR**

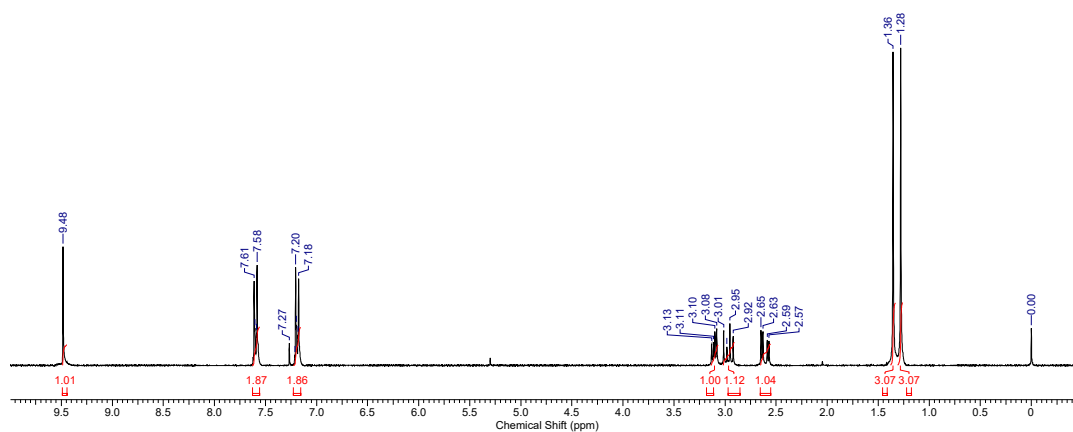

### <sup>13</sup>C NMR

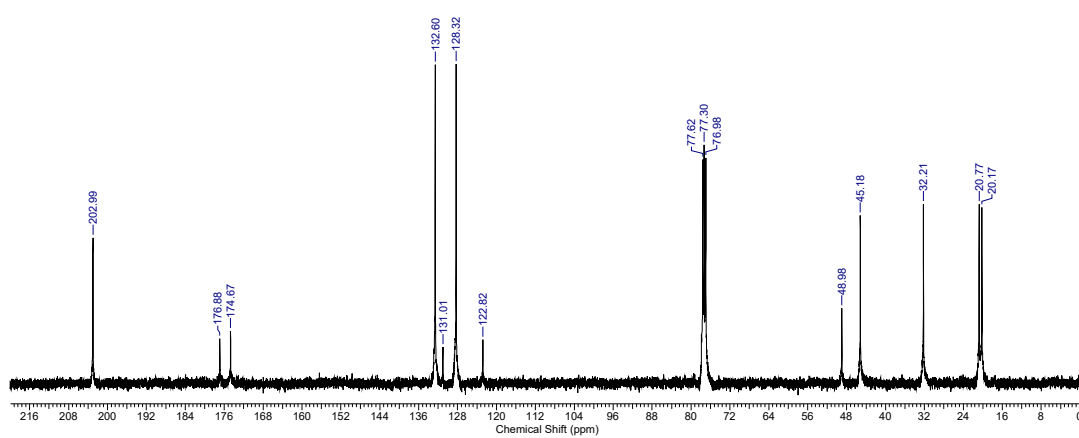

### Mass

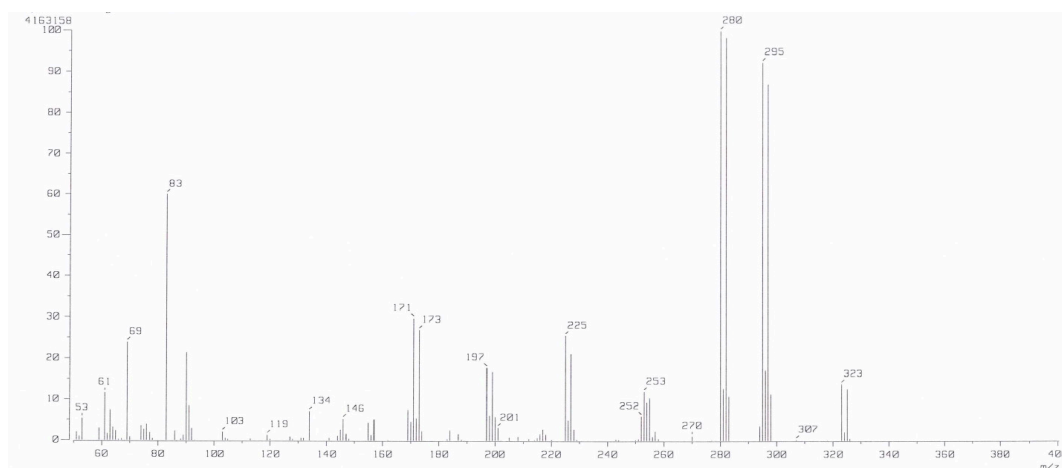

Table 2, entry 4

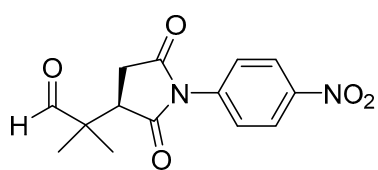

**2e**

Racemic

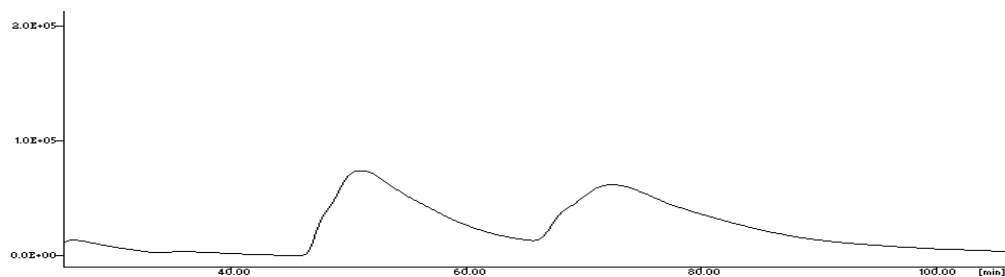

| # | Name | RT     | Area[uV.Sec] | Quantity |
|---|------|--------|--------------|----------|
| 1 |      | 50.975 | 32694061.500 | 0.000    |
| 2 |      | 72.325 | 34471650.877 | 0.000    |

Total Area of Peak = 67165712.377 [uV.Sec]

Asymmetric

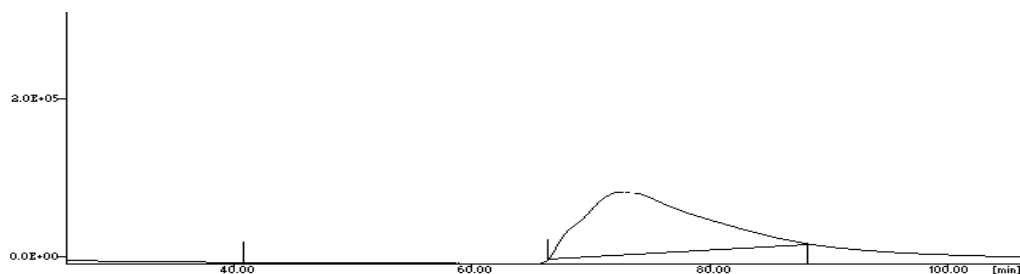

| # | Name | RT     | Area[uV.Sec] | Quantity |
|---|------|--------|--------------|----------|
| 1 |      | 44.442 | 312501.490   | 0.000    |
| 2 |      | 72.600 | 53641693.000 | 0.000    |

Total Area of Peak = 53954194.490 [uV.Sec]

**<sup>1</sup>H NMR**

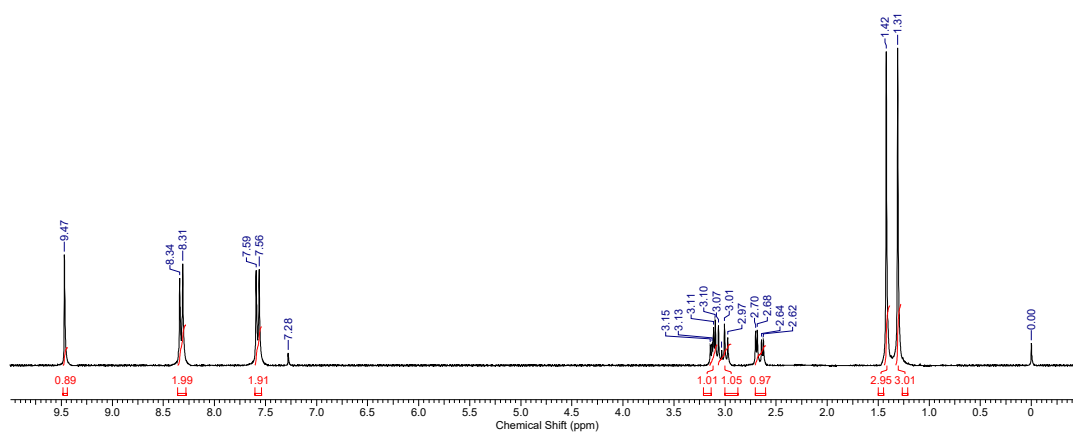

<sup>13</sup>C NMR

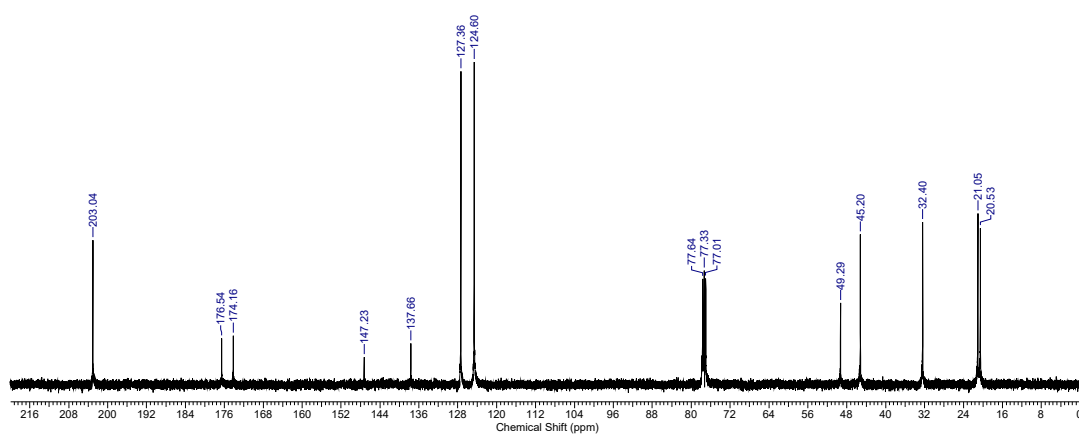

Mass

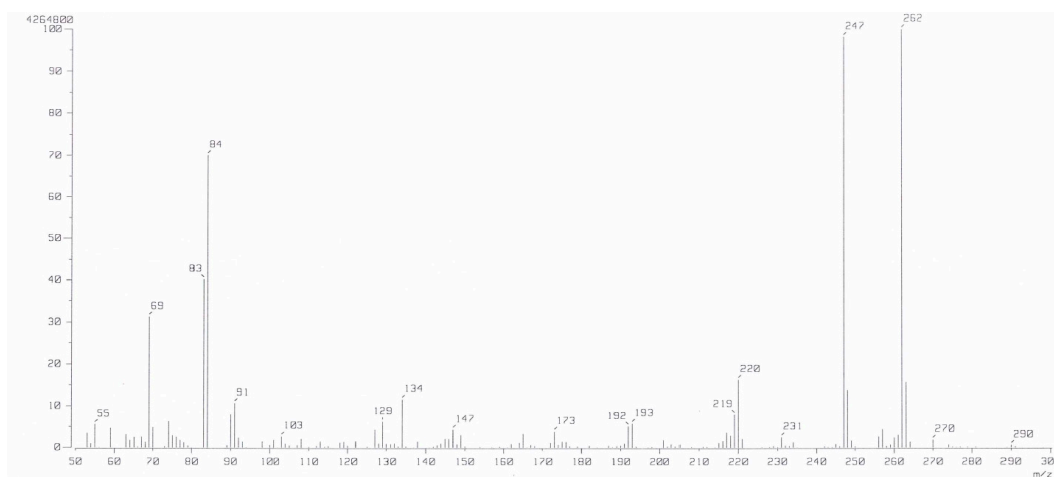

Figure 6. 1st

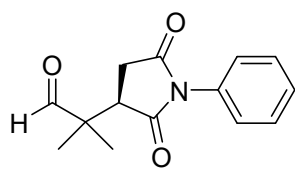

**2a**

Asymmetric

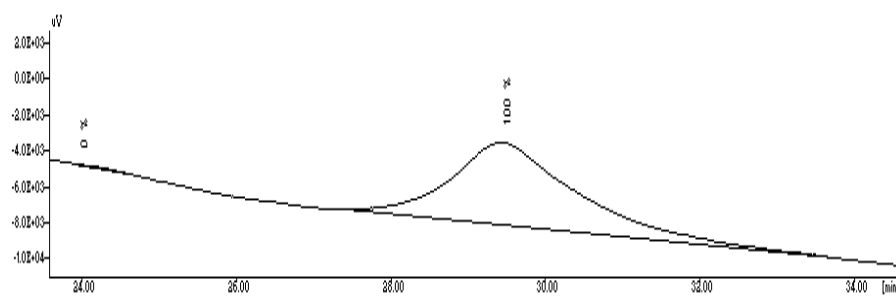

| # | Name | RT     | Area[uV.Sec] | Quantity |
|---|------|--------|--------------|----------|
| 1 |      | 25.117 | 16883.500    | 0.000    |
| 2 |      | 30.267 | 976364.631   | 0.000    |

**Figure 6. 2nd**

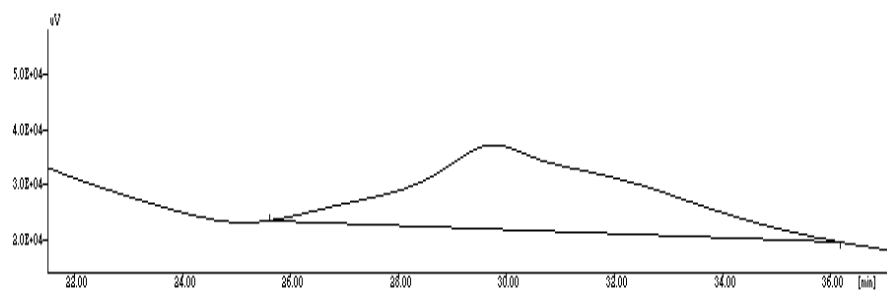

| # | Name | RT     | Area[uV.Sec] | Quantity |
|---|------|--------|--------------|----------|
| 1 |      | 29.808 | 4406342.000  | 0.000    |

Figure 6. 3rd

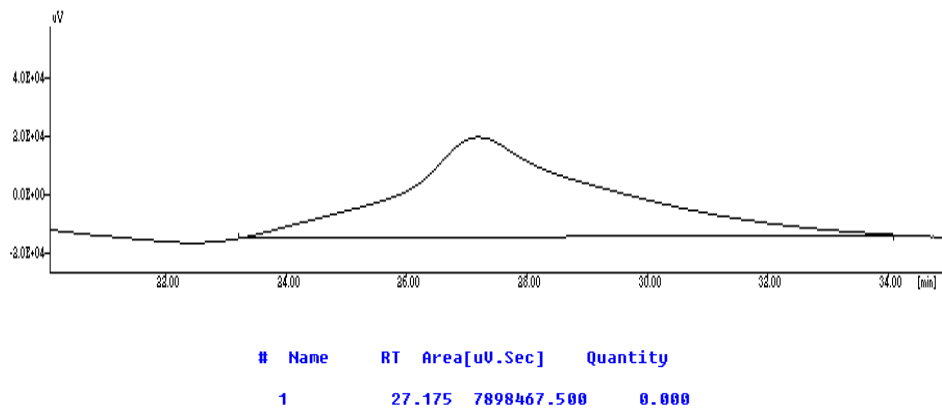

Figure 6. 4th

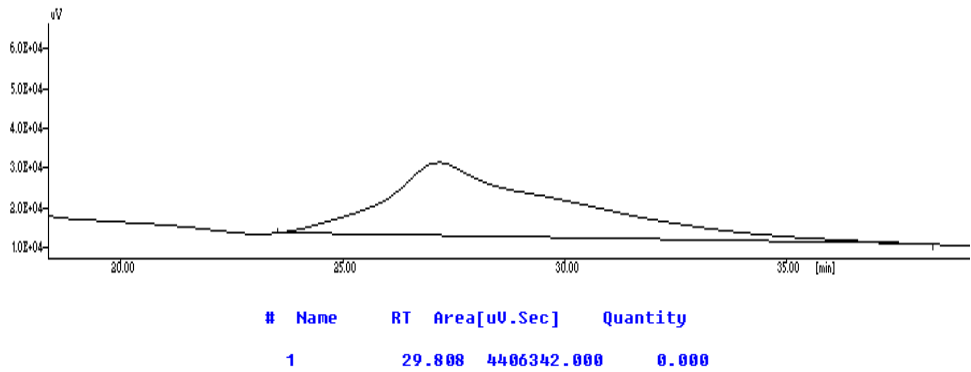

Figure 7.

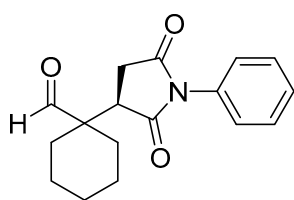

**2f**

Racemic

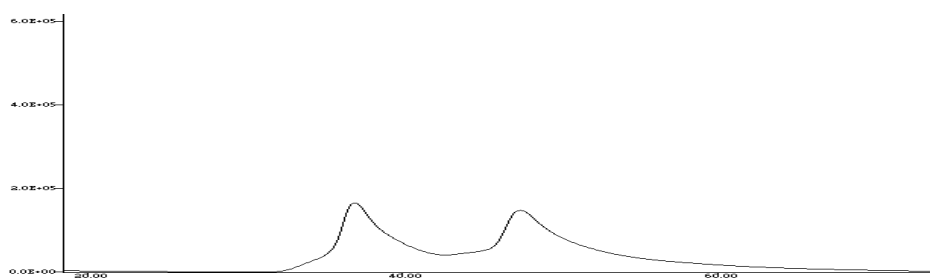

| # | Name | RT     | Area[uV.Sec] | Quantity |
|---|------|--------|--------------|----------|
| 1 |      | 36.900 | 24715311.000 | 0.000    |
| 2 |      | 47.400 | 24489120.000 | 0.000    |

Total Area of Peak = 49204431.000 [uV.Sec]

Asymmetric

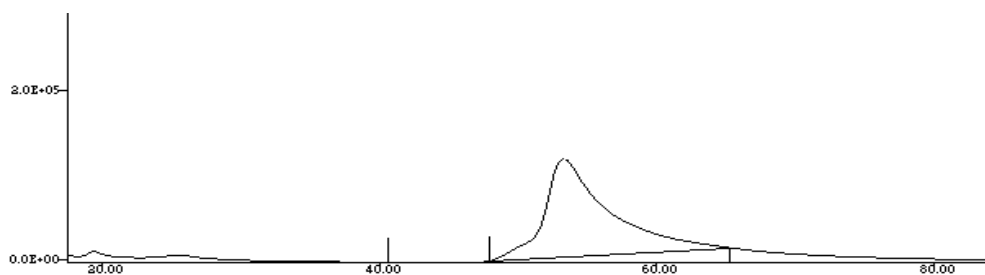

| # | Name | RT     | Area[uV.Sec] | Quantity |
|---|------|--------|--------------|----------|
| 1 |      | 42.400 | 2822.259     | 0.000    |
| 2 |      | 53.233 | 36830060.500 | 0.000    |

Total Area of Peak = 36832882.759 [uV.Sec]

**<sup>1</sup>H NMR**



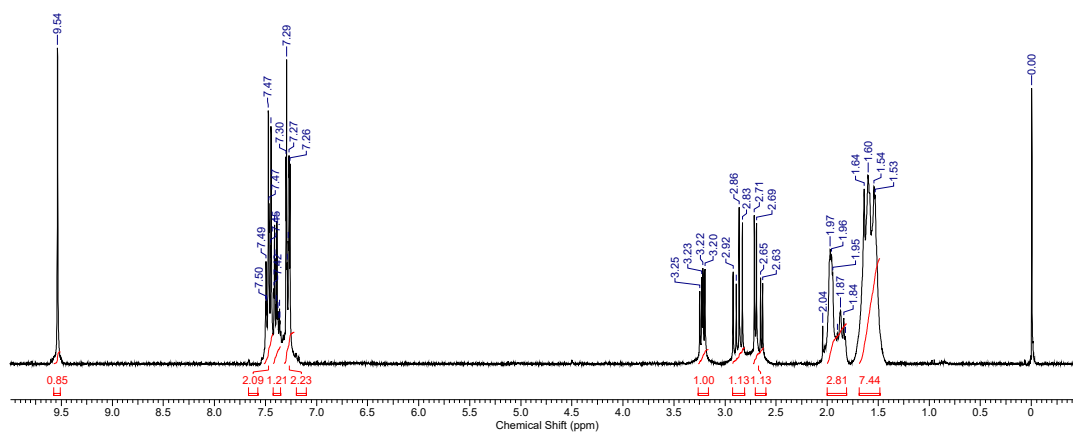

### <sup>13</sup>C NMR

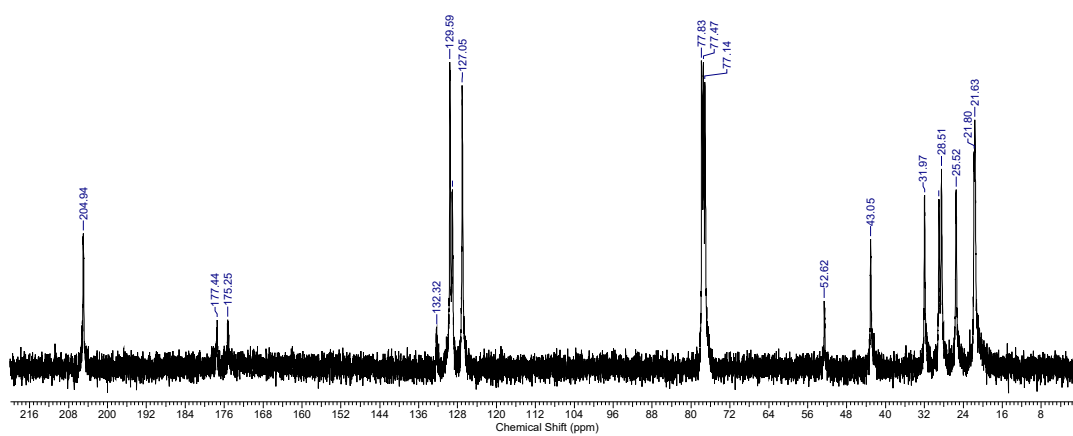

### Mass

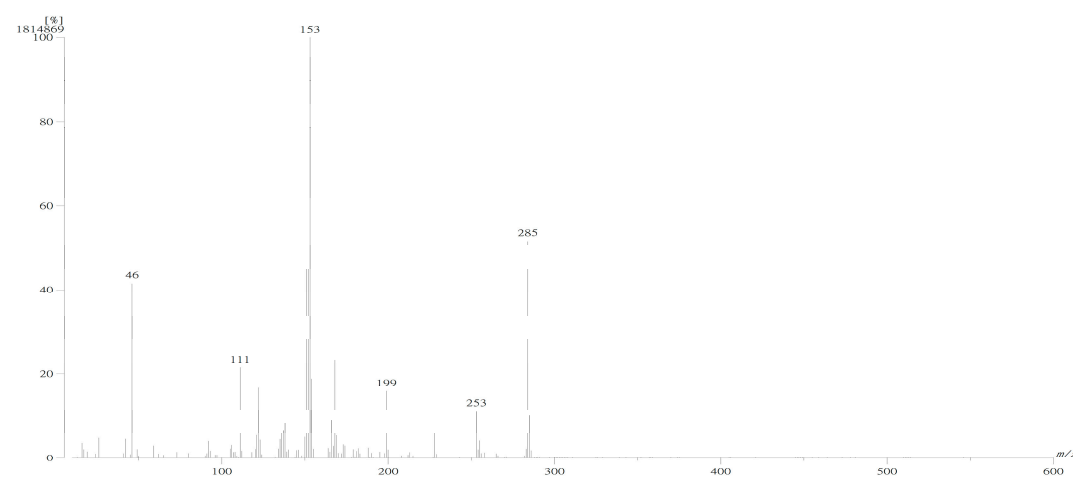

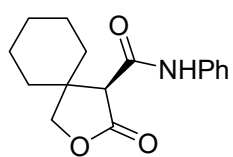

**3a**

Racemic

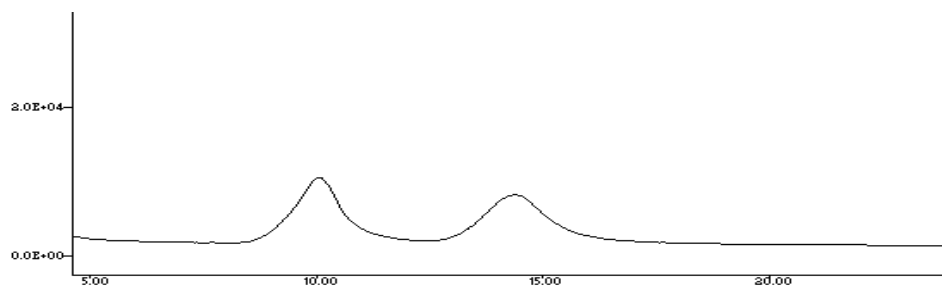

| # | Name | RT     | Area[uV.Sec] | Quantity |
|---|------|--------|--------------|----------|
| 1 |      | 10.050 | 631497.500   | 0.000    |
| 2 |      | 14.342 | 586048.000   | 0.000    |

Total Area of Peak = 1217545.500 [uV.Sec]

Asymmetric

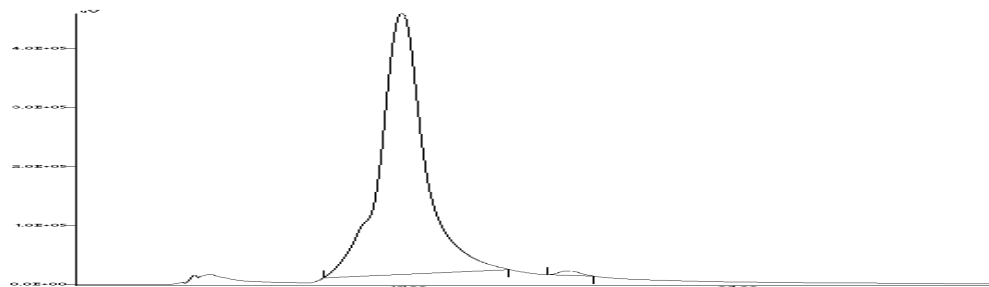

| # | Name | RT     | Area[uV.Sec] | Quantity |
|---|------|--------|--------------|----------|
| 1 |      | 9.875  | 39721216.000 | 0.000    |
| 2 |      | 14.933 | 316721.500   | 0.000    |

Total Area of Peak = 40037937.500 [uV.Sec]

**<sup>1</sup>H NMR**

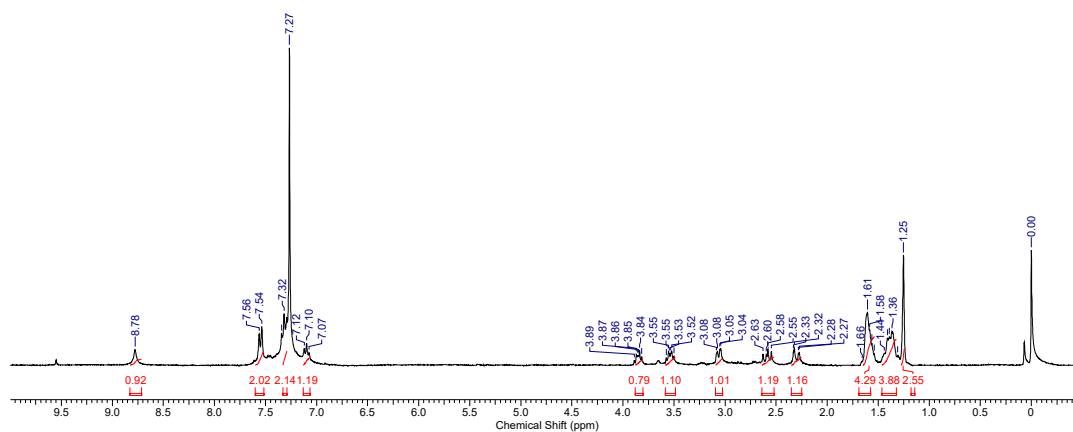

## Mass

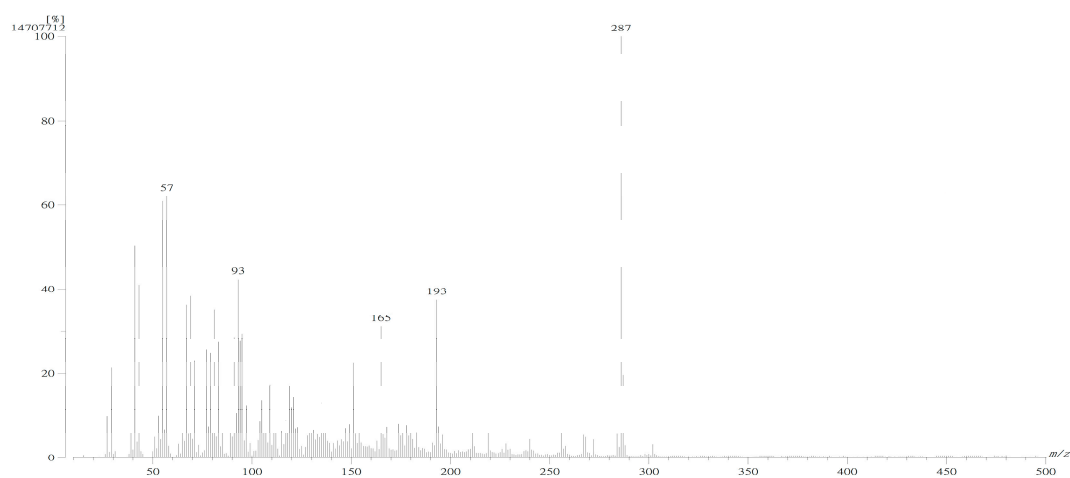

## 3. DFT Calculations for all Calculated Structures

**Figure 2.**  
**Isobutyraldehyde(1)**

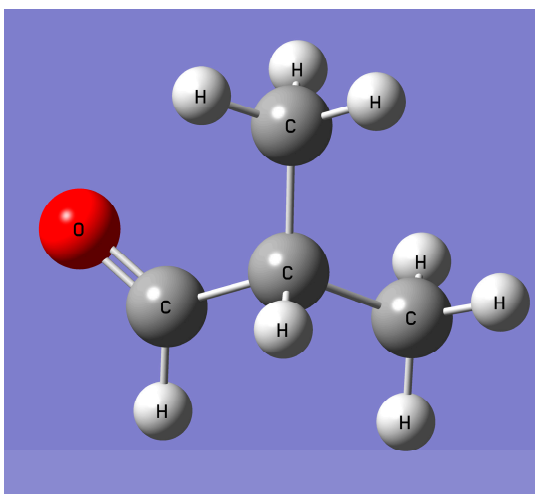

Calculation Type = FREQ

Calculation Method = RB3LYP

Basis Set = 6-31G(d,p)

Charge = 0

Spin = Singlet

Solvation = None

E(RB3LYP) = -231.1863 Hartree

RMS Gradient Norm = 1.149e-06 Hartree/Bohr

Temperature = 298.15 Kelvin

Pressure = 1 atm

Frequencies scaled by = 1

Electronic Energy (EE) = -231.1863 Hartree

Zero-point Energy Correction = 0.113857 Hartree

Thermal Correction to Energy = 0.120107 Hartree

Thermal Correction to Enthalpy = 0.121051 Hartree

Thermal Correction to Free Energy = 0.084517 Hartree

EE + Zero-point Energy = -231.07245 Hartree

EE + Thermal Energy Correction = -231.0662 Hartree

EE + Thermal Enthalpy Correction = -231.06525 Hartree

EE + Thermal Free Energy Correction = -231.10179 Hartree

E (Thermal) = 75.368 kcal/mol

Heat Capacity (Cv) = 20.996 cal/mol-kelvin

Entropy (S) = 76.892 cal/mol-kelvin

Symbolic Z-matrix:

Charge = 0 Multiplicity = 1

|   |          |          |          |
|---|----------|----------|----------|
| O | -1.93772 | -0.01911 | -0.18662 |
| H | -0.98241 | -1.73615 | 0.18648  |
| C | 0.40553  | -0.0029  | 0.40549  |
| C | 1.50957  | -0.84953 | -0.20595 |
| H | 0.50964  | -0.02487 | 1.51893  |
| H | 1.44892  | -0.86091 | -1.30238 |
| H | 2.49975  | -0.45869 | 0.06243  |
| H | 1.46195  | -1.89091 | 0.13935  |
| C | -0.94117 | -0.63596 | 0.10753  |
| C | 0.51426  | 1.43524  | -0.06485 |
| H | -0.27004 | 2.06351  | 0.37674  |
| H | 1.48383  | 1.86805  | 0.21441  |
| H | 0.421    | 1.51168  | -1.15631 |

## Maleimide(2)

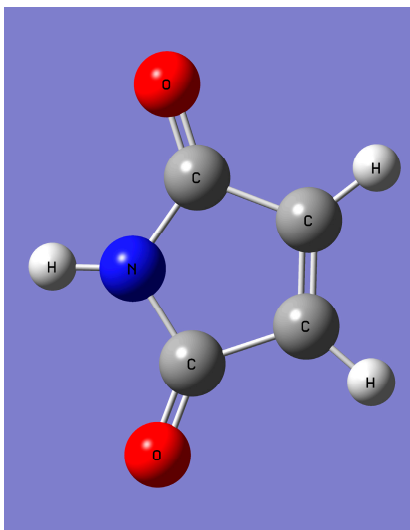

Calculation Type = FREQ

Calculation Method = RB3LYP

Basis Set = 6-31G(d,p)

Charge = 0

Spin = Singlet

Solvation = None

E(RB3LYP) = -357.44052 Hartree

RMS Gradient Norm = 1.933e-06 Hartree/Bohr

Temperature = 298.15 Kelvin

Pressure = 1 atm

Frequencies scaled by = 1

Electronic Energy (EE) = -357.44052 Hartree

Zero-point Energy Correction = 0.068699 Hartree

Thermal Correction to Energy = 0.073931 Hartree

Thermal Correction to Enthalpy = 0.074875 Hartree

Thermal Correction to Free Energy = 0.040319 Hartree

EE + Zero-point Energy = -357.37182 Hartree

EE + Thermal Energy Correction = -357.36659 Hartree

EE + Thermal Enthalpy Correction = -357.36564 Hartree

EE + Thermal Free Energy Correction = -357.4002 Hartree

E (Thermal) = 46.392 kcal/mol

Heat Capacity (Cv) = 19.398 cal/mol-kelvin

Entropy (S) = 72.729 cal/mol-kelvin

Symbolic Z-matrix:

Charge = 0 Multiplicity = 1

|   |         |          |          |
|---|---------|----------|----------|
| C | 1.59514 | 1.16029  | 0.       |
| C | 3.01303 | 0.66578  | 0.       |
| C | 3.01303 | -0.66578 | 0.       |
| C | 1.59514 | -1.16029 | 0.       |
| H | 3.84575 | 1.34874  | 0.       |
| H | 3.84574 | -1.34874 | 0.       |
| O | 1.22636 | 2.33376  | 0.00001  |
| O | 1.22636 | -2.33376 | -0.00001 |
| N | 0.7628  | 0.       | 0.       |
| H | -0.2372 | 0.       | 0.       |

### 1b Cat.(3)

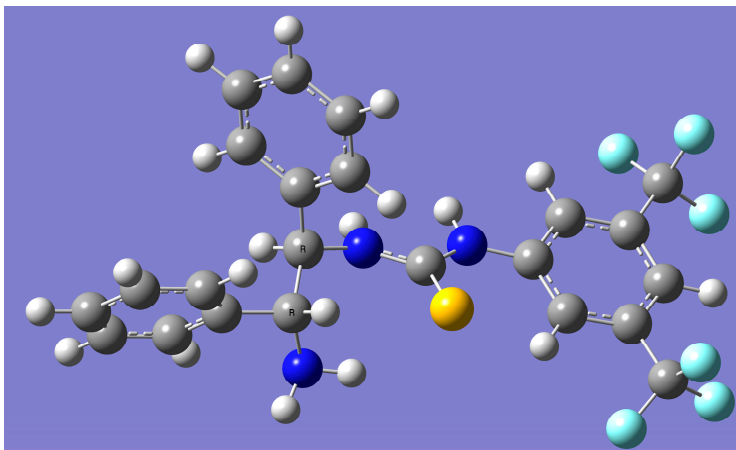

Calculation Type = FREQ

Calculation Method = RB3LYP

Basis Set = 6-31G(d,p)

Charge = 0

Spin = Singlet

Solvation = None

E(RB3LYP) = -2038.4342 Hartree

RMS Gradient Norm = 2.73e-07 Hartree/Bohr

Temperature = 298.15 Kelvin

Pressure = 1 atm

Frequencies scaled by = 1

Electronic Energy (EE) = -2038.4342 Hartree

Zero-point Energy Correction = 0.390498 Hartree

Thermal Correction to Energy = 0.419537 Hartree

Thermal Correction to Enthalpy = 0.420482 Hartree

Thermal Correction to Free Energy = 0.325242 Hartree

EE + Zero-point Energy = -2038.0437 Hartree

EE + Thermal Energy Correction = -2038.0147 Hartree

EE + Thermal Enthalpy Correction = -2038.0138 Hartree

EE + Thermal Free Energy Correction = -2038.109 Hartree



E (Thermal) = 263.264 kcal/mol

Heat Capacity (Cv) = 110.445 cal/mol-kelvin

Entropy (S) = 200.448 cal/mol-kelvin

Symbolic Z-matrix:

Charge = 0 Multiplicity = 1

|   |         |          |          |
|---|---------|----------|----------|
| C | 5.35849 | 1.33787  | -1.80781 |
| C | 4.82708 | 1.14638  | -0.52483 |
| C | 5.69825 | 0.95831  | 0.5539   |
| C | 7.08048 | 0.9594   | 0.3547   |
| C | 7.60459 | 1.1496   | -0.92613 |
| C | 6.73965 | 1.33999  | -2.00723 |
| H | 4.67012 | 1.50429  | -2.62759 |
| H | 5.29272 | 0.8047   | 1.54752  |
| H | 7.74614 | 0.81433  | 1.19782  |
| H | 8.67773 | 1.1541   | -1.07954 |
| H | 7.1414  | 1.49523  | -3.00239 |
| C | 3.29335 | -1.35884 | 0.35108  |
| C | 4.2752  | -2.28379 | -0.02492 |
| C | 4.73342 | -3.24351 | 0.88009  |
| C | 4.21062 | -3.28913 | 2.17354  |
| C | 3.23141 | -2.36846 | 2.55692  |
| C | 2.77436 | -1.40784 | 1.65364  |
| H | 4.69377 | -2.24224 | -1.0248  |
| H | 5.49665 | -3.95033 | 0.57561  |
| H | 4.56373 | -4.03365 | 2.87769  |
| H | 2.82295 | -2.39699 | 3.56063  |
| H | 2.01493 | -0.69495 | 1.95103  |
| C | 3.3155  | 1.12842  | -0.32606 |
| C | 2.81394 | -0.3166  | -0.65186 |
| N | 1.33778 | -0.45595 | -0.89719 |

|   |          |          |          |
|---|----------|----------|----------|
| N | 2.68733  | 2.05148  | -1.30251 |
| H | 3.24995  | -0.54539 | -1.62815 |
| H | 3.07939  | 1.35208  | 0.7202   |
| H | 3.151    | 2.9666   | -1.25754 |
| H | 1.69517  | 2.17017  | -1.06525 |
| H | 1.14702  | -1.08786 | -1.67474 |
| C | 0.25972  | 0.03025  | -0.23611 |
| C | -2.73205 | 0.98572  | 0.09707  |
| C | -4.09709 | 1.1922   | 0.26486  |
| C | -5.03531 | 0.22018  | -0.05727 |
| C | -4.57426 | -0.9948  | -0.54801 |
| C | -3.217   | -1.22889 | -0.71787 |
| C | -2.27072 | -0.24091 | -0.40093 |
| H | -2.03806 | 1.77115  | 0.34469  |
| H | -6.0936  | 0.41447  | 0.04014  |
| H | -2.90295 | -2.18378 | -1.12204 |
| N | -0.92225 | -0.55008 | -0.67028 |
| S | 0.33444  | 1.23285  | 1.01256  |
| H | -0.81622 | -1.3929  | -1.23506 |
| F | -5.79041 | -2.88065 | 0.25434  |
| F | -5.05699 | -2.91949 | -1.82873 |
| F | -6.75108 | -1.57598 | -1.24681 |
| F | -3.69111 | 3.50442  | 0.54004  |
| F | -5.8118  | 2.80855  | 0.3756   |
| F | -4.65299 | 2.43695  | 2.21884  |
| C | -5.54204 | -2.08849 | -0.84265 |
| C | -4.55983 | 2.48514  | 0.84774  |

## H<sub>2</sub>O

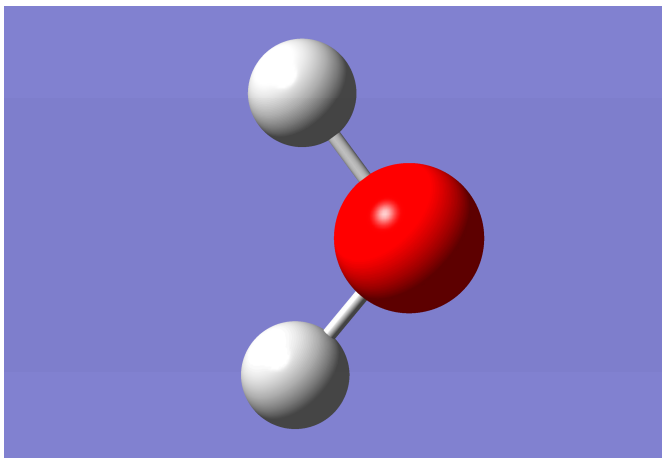

Calculation Type = FREQ

Calculation Method = RB3LYP

Basis Set = 6-31G(d,p)

Charge = 0

Spin = Singlet

Solvation = None

E(RB3LYP) = -75.973965 Hartree

RMS Gradient Norm = 0.000115305 Hartree/Bohr

Temperature = 298.15 Kelvin

Pressure = 1 atm

Frequencies scaled by = 1

Electronic Energy (EE) = -75.973965 Hartree

Zero-point Energy Correction = 0.019746 Hartree

Thermal Correction to Energy = 0.022581 Hartree

Thermal Correction to Enthalpy = 0.023525 Hartree

Thermal Correction to Free Energy = 0.002 Hartree

EE + Zero-point Energy = -75.954218 Hartree

EE + Thermal Energy Correction = -75.951384 Hartree

EE + Thermal Enthalpy Correction = -75.95044 Hartree

EE + Thermal Free Energy Correction = -75.971965 Hartree

E (Thermal) = 14.17 kcal/mol

Heat Capacity (Cv) = 5.999 cal/mol-kelvin

Entropy (S) = 45.304 cal/mol-kelvin

Symbolic Z-matrix:

Charge = 0 Multiplicity = 1

O -0.0579 2.33917 -0.16269

H 0.9021 2.33917 -0.16269

H -0.37836 3.24411 -0.16269

TS

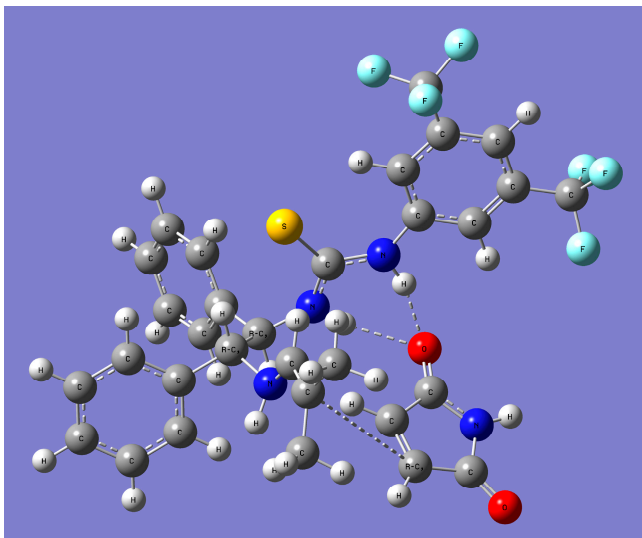

Calculation Type = FREQ

Calculation Method = RB3LYP

Basis Set = 6-31G(d,p)

Charge = 0

Spin = Singlet

Solvation = None

E(RB3LYP) = -2551.0871 Hartree

RMS Gradient Norm = 4.11e-07 Hartree/Bohr

Temperature = 298.15 Kelvin

Pressure = 1 atm

Frequencies scaled by = 1

Electronic Energy (EE) = -2551.0871 Hartree

Zero-point Energy Correction = 0.551515 Hartree

Thermal Correction to Energy = 0.592901 Hartree

Thermal Correction to Enthalpy = 0.593846 Hartree

Thermal Correction to Free Energy = 0.468285 Hartree

EE + Zero-point Energy = -2550.5356 Hartree

EE + Thermal Energy Correction = -2550.4942 Hartree  
 EE + Thermal Enthalpy Correction = -2550.4933 Hartree  
 EE + Thermal Free Energy Correction = -2550.6188 Hartree  
 E (Thermal) = 372.051 kcal/mol  
 Heat Capacity (Cv) = 153.154 cal/mol-kelvin  
 Entropy (S) = 264.265 cal/mol-kelvin

Symbolic Z-matrix:

Charge = 0 Multiplicity = 1

|   |         |          |          |
|---|---------|----------|----------|
| C | 5.37602 | 0.57255  | 0.13239  |
| C | 4.58852 | -0.4647  | 0.65675  |
| C | 5.22523 | -1.57803 | 1.21612  |
| C | 6.61882 | -1.6545  | 1.25587  |
| C | 7.3942  | -0.61565 | 0.73765  |
| C | 6.76879 | 0.49963  | 0.1748   |
| H | 4.90214 | 1.44068  | -0.31631 |
| H | 4.62603 | -2.38756 | 1.61669  |
| H | 7.09726 | -2.52375 | 1.69171  |
| H | 8.47578 | -0.67426 | 0.76986  |
| H | 7.36469 | 1.30805  | -0.23329 |
| C | 3.07802 | -1.57727 | -1.66749 |
| C | 4.00068 | -1.29683 | -2.68556 |
| C | 4.53106 | -2.31758 | -3.47533 |
| C | 4.13998 | -3.63987 | -3.25913 |
| C | 3.21847 | -3.92887 | -2.25035 |
| C | 2.69023 | -2.90824 | -1.45784 |
| H | 4.31385 | -0.27221 | -2.85649 |
| H | 5.24493 | -2.08024 | -4.25573 |
| H | 4.54756 | -4.4361  | -3.87133 |
| H | 2.90592 | -4.95255 | -2.07824 |

|   |          |          |          |
|---|----------|----------|----------|
| H | 1.96749  | -3.1348  | -0.68589 |
| C | 3.06977  | -0.37141 | 0.63869  |
| C | 2.54146  | -0.41496 | -0.83161 |
| N | 1.06486  | -0.23863 | -0.93127 |
| N | 2.6361   | 0.91997  | 1.27578  |
| H | 2.92913  | 0.50072  | -1.29052 |
| H | 2.63788  | -1.2062  | 1.19017  |
| H | 0.78975  | 0.506    | -1.57595 |
| C | 0.03522  | -0.85826 | -0.29362 |
| C | -2.96022 | -1.70535 | 0.39432  |
| C | -4.32442 | -1.86924 | 0.61564  |
| C | -5.26805 | -0.98264 | 0.11442  |
| C | -4.81312 | 0.10339  | -0.62528 |
| C | -3.45975 | 0.30004  | -0.84787 |
| C | -2.50395 | -0.6033  | -0.34361 |
| H | -2.25995 | -2.42436 | 0.78613  |
| H | -6.32295 | -1.13153 | 0.29326  |
| H | -3.13638 | 1.16903  | -1.40831 |
| N | -1.1721  | -0.30019 | -0.65779 |
| S | 0.20123  | -2.14907 | 0.8641   |
| H | -1.08496 | 0.54178  | -1.23937 |
| F | -6.9374  | 1.12313  | -0.49143 |
| F | -6.17629 | 0.63918  | -2.50724 |
| F | -5.25227 | 2.29816  | -1.38078 |
| F | -3.92513 | -4.07187 | 1.37743  |
| F | -4.82966 | -2.65282 | 2.80856  |
| F | -6.04535 | -3.4028  | 1.12405  |
| C | -5.79221 | 1.03675  | -1.2464  |
| C | -4.77712 | -2.99896 | 1.477    |
| C | -0.08855 | 3.1443   | -1.35866 |
| C | 0.09261  | 5.37327  | -0.74436 |

|   |          |         |          |
|---|----------|---------|----------|
| C | 1.00825  | 4.54202 | 0.11701  |
| O | -0.45908 | 2.1194  | -1.96482 |
| H | 1.4294   | 2.39401 | 0.1837   |
| H | 3.43346  | 1.53357 | 1.45189  |
| C | 1.70364  | 0.87334 | 2.34793  |
| C | 1.59899  | 1.75253 | 3.35788  |
| C | 2.52885  | 2.93284 | 3.55985  |
| C | 0.48255  | 1.62411 | 4.37553  |
| H | 1.00075  | 0.05123 | 2.26528  |
| H | 2.02982  | 3.87886 | 3.29957  |
| H | 2.82585  | 3.00533 | 4.61401  |
| H | 3.44684  | 2.86017 | 2.96515  |
| H | 0.89082  | 1.52648 | 5.39111  |
| H | -0.16261 | 2.51466 | 4.36818  |
| H | -0.14253 | 0.74903 | 4.17088  |
| C | 0.90833  | 3.25372 | -0.23067 |
| H | 1.61847  | 4.98031 | 0.88925  |
| O | -0.1085  | 6.57853 | -0.74394 |
| N | -0.53034 | 4.4275  | -1.61151 |
| H | -1.21607 | 4.67095 | -2.31721 |



## TS(Gas)

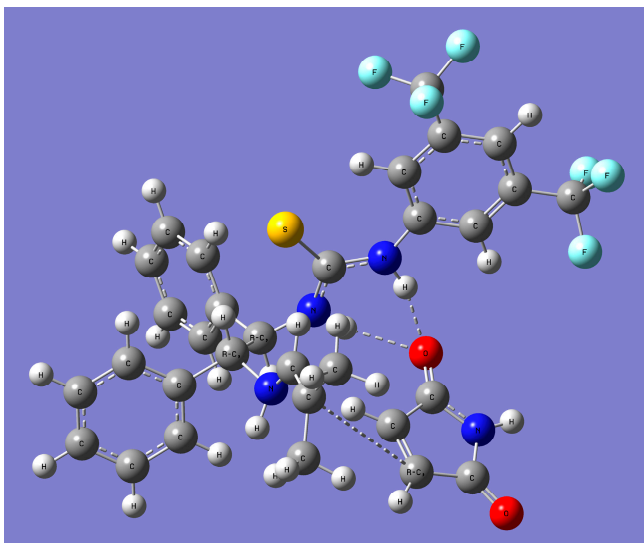

Calculation Type = FREQ

Calculation Method = RB3LYP

Basis Set = 6-31G(d,p)

Charge = 0

Spin = Singlet

Solvation = None

E(RB3LYP) = -2551.0871 Hartree

RMS Gradient Norm = 4.11e-07 Hartree/Bohr

Temperature = 298.15 Kelvin

Pressure = 1 atm

Frequencies scaled by = 1

Electronic Energy (EE) = -2551.0871 Hartree

Zero-point Energy Correction = 0.551515 Hartree

Thermal Correction to Energy = 0.592901 Hartree

Thermal Correction to Enthalpy = 0.593846 Hartree

Thermal Correction to Free Energy = 0.468285 Hartree

EE + Zero-point Energy = -2550.5356 Hartree

EE + Thermal Energy Correction = -2550.4942 Hartree

EE + Thermal Enthalpy Correction = -2550.4933 Hartree  
 EE + Thermal Free Energy Correction = -2550.6188 Hartree  
 E (Thermal) = 372.051 kcal/mol  
 Heat Capacity (Cv) = 153.154 cal/mol-kelvin  
 Entropy (S) = 264.265 cal/mol-kelvin

Symbolic Z-matrix:

Charge = 0 Multiplicity = 1

|   |         |          |          |
|---|---------|----------|----------|
| C | 5.37602 | 0.57255  | 0.13239  |
| C | 4.58852 | -0.4647  | 0.65675  |
| C | 5.22523 | -1.57803 | 1.21612  |
| C | 6.61882 | -1.6545  | 1.25587  |
| C | 7.3942  | -0.61565 | 0.73765  |
| C | 6.76879 | 0.49963  | 0.1748   |
| H | 4.90214 | 1.44068  | -0.31631 |
| H | 4.62603 | -2.38756 | 1.61669  |
| H | 7.09726 | -2.52375 | 1.69171  |
| H | 8.47578 | -0.67426 | 0.76986  |
| H | 7.36469 | 1.30805  | -0.23329 |
| C | 3.07802 | -1.57727 | -1.66749 |
| C | 4.00068 | -1.29683 | -2.68556 |
| C | 4.53106 | -2.31758 | -3.47533 |
| C | 4.13998 | -3.63987 | -3.25913 |
| C | 3.21847 | -3.92887 | -2.25035 |
| C | 2.69023 | -2.90824 | -1.45784 |
| H | 4.31385 | -0.27221 | -2.85649 |
| H | 5.24493 | -2.08024 | -4.25573 |
| H | 4.54756 | -4.4361  | -3.87133 |
| H | 2.90592 | -4.95255 | -2.07824 |
| H | 1.96749 | -3.1348  | -0.68589 |

|   |          |          |          |
|---|----------|----------|----------|
| C | 3.06977  | -0.37141 | 0.63869  |
| C | 2.54146  | -0.41496 | -0.83161 |
| N | 1.06486  | -0.23863 | -0.93127 |
| N | 2.6361   | 0.91997  | 1.27578  |
| H | 2.92913  | 0.50072  | -1.29052 |
| H | 2.63788  | -1.2062  | 1.19017  |
| H | 0.78975  | 0.506    | -1.57595 |
| C | 0.03522  | -0.85826 | -0.29362 |
| C | -2.96022 | -1.70535 | 0.39432  |
| C | -4.32442 | -1.86924 | 0.61564  |
| C | -5.26805 | -0.98264 | 0.11442  |
| C | -4.81312 | 0.10339  | -0.62528 |
| C | -3.45975 | 0.30004  | -0.84787 |
| C | -2.50395 | -0.6033  | -0.34361 |
| H | -2.25995 | -2.42436 | 0.78613  |
| H | -6.32295 | -1.13153 | 0.29326  |
| H | -3.13638 | 1.16903  | -1.40831 |
| N | -1.1721  | -0.30019 | -0.65779 |
| S | 0.20123  | -2.14907 | 0.8641   |
| H | -1.08496 | 0.54178  | -1.23937 |
| F | -6.9374  | 1.12313  | -0.49143 |
| F | -6.17629 | 0.63918  | -2.50724 |
| F | -5.25227 | 2.29816  | -1.38078 |
| F | -3.92513 | -4.07187 | 1.37743  |
| F | -4.82966 | -2.65282 | 2.80856  |
| F | -6.04535 | -3.4028  | 1.12405  |
| C | -5.79221 | 1.03675  | -1.2464  |
| C | -4.77712 | -2.99896 | 1.477    |
| C | -0.08855 | 3.1443   | -1.35866 |
| C | 0.09261  | 5.37327  | -0.74436 |
| C | 1.00825  | 4.54202  | 0.11701  |

|   |          |         |          |
|---|----------|---------|----------|
| O | -0.45908 | 2.1194  | -1.96482 |
| H | 1.4294   | 2.39401 | 0.1837   |
| H | 3.43346  | 1.53357 | 1.45189  |
| C | 1.70364  | 0.87334 | 2.34793  |
| C | 1.59899  | 1.75253 | 3.35788  |
| C | 2.52885  | 2.93284 | 3.55985  |
| C | 0.48255  | 1.62411 | 4.37553  |
| H | 1.00075  | 0.05123 | 2.26528  |
| H | 2.02982  | 3.87886 | 3.29957  |
| H | 2.82585  | 3.00533 | 4.61401  |
| H | 3.44684  | 2.86017 | 2.96515  |
| H | 0.89082  | 1.52648 | 5.39111  |
| H | -0.16261 | 2.51466 | 4.36818  |
| H | -0.14253 | 0.74903 | 4.17088  |
| C | 0.90833  | 3.25372 | -0.23067 |
| H | 1.61847  | 4.98031 | 0.88925  |
| O | -0.1085  | 6.57853 | -0.74394 |
| N | -0.53034 | 4.4275  | -1.61151 |
| H | -1.21607 | 4.67095 | -2.31721 |

## TS(Gas)+3H<sub>2</sub>O

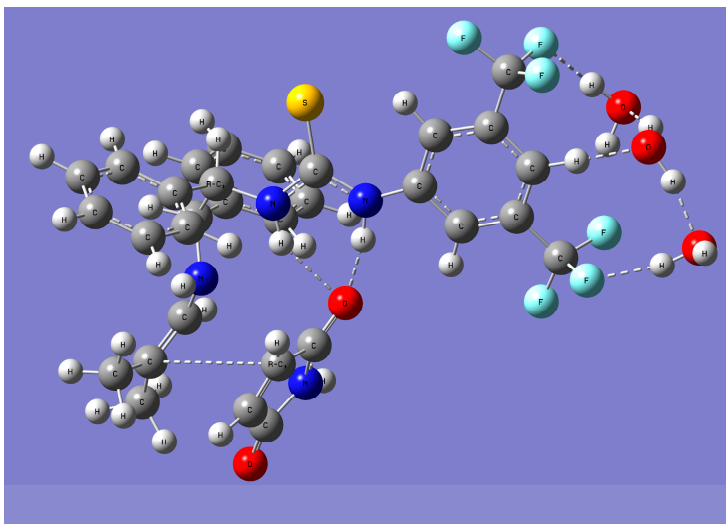

Calculation Type = FREQ

Calculation Method = RB3LYP

Basis Set = 6-31G(d,p)

Charge = 0

Spin = Singlet

Solvation = None

E(RB3LYP) = -2779.1179 Hartree

RMS Gradient Norm = 2.45e-07 Hartree/Bohr

Temperature = 298.15 Kelvin

Pressure = 1 atm

Frequencies scaled by = 1

Electronic Energy (EE) = -2779.1179 Hartree

Zero-point Energy Correction = 0.626939 Hartree

Thermal Correction to Energy = 0.675005 Hartree

Thermal Correction to Enthalpy = 0.675949 Hartree

Thermal Correction to Free Energy = 0.539008 Hartree

EE + Zero-point Energy = -2778.4909 Hartree

EE + Thermal Energy Correction = -2778.4429 Hartree

EE + Thermal Enthalpy Correction = -2778.4419 Hartree

EE + Thermal Free Energy Correction = -2778.5789 Hartree

E (Thermal) = 423.572 kcal/mol

Heat Capacity (Cv) = 178.166 cal/mol-kelvin

Entropy (S) = 288.218 cal/mol-kelvin

Symbolic Z-matrix:

Charge = 0 Multiplicity = 1

|   |          |          |          |
|---|----------|----------|----------|
| C | -2.31938 | 0.37882  | 2.66547  |
| C | -3.31181 | -0.58515 | 2.42974  |
| C | -3.89683 | -1.23303 | 3.52691  |
| C | -3.49912 | -0.93829 | 4.83143  |
| C | -2.50971 | 0.01964  | 5.05749  |
| C | -1.9255  | 0.67573  | 3.97201  |
| H | -1.84194 | 0.8968   | 1.84508  |
| H | -4.67206 | -1.97326 | 3.35695  |
| H | -3.96179 | -1.4522  | 5.66585  |
| H | -2.19617 | 0.25231  | 6.06834  |
| H | -1.15222 | 1.41643  | 4.1411   |
| C | -3.38857 | -2.54405 | -0.92274 |
| C | -4.36022 | -3.5409  | -0.7552  |
| C | -5.03558 | -4.06732 | -1.85587 |
| C | -4.74826 | -3.603   | -3.14291 |
| C | -3.77294 | -2.62082 | -3.31971 |
| C | -3.09469 | -2.0968  | -2.21529 |
| H | -4.57735 | -3.91709 | 0.23961  |
| H | -5.77763 | -4.84414 | -1.71236 |
| H | -5.27    | -4.01422 | -3.99898 |
| H | -3.52791 | -2.27336 | -4.31698 |
| H | -2.30668 | -1.3666  | -2.35207 |
| C | -3.75747 | -0.99895 | 1.03466  |
| C | -2.72449 | -1.93348 | 0.31619  |

|   |          |          |          |
|---|----------|----------|----------|
| N | -1.5568  | -1.11951 | -0.00133 |
| N | -3.99603 | 0.17174  | 0.12485  |
| H | -2.4152  | -2.73186 | 0.99655  |
| H | -4.68468 | -1.57904 | 1.13908  |
| H | -1.7527  | -0.12376 | -0.09662 |
| C | -0.26252 | -1.55888 | 0.00278  |
| C | 2.87814  | -1.56139 | -0.30529 |
| C | 4.24714  | -1.35356 | -0.44264 |
| C | 4.79316  | -0.08384 | -0.57731 |
| C | 3.92731  | 1.00423  | -0.55688 |
| C | 2.5595   | 0.82805  | -0.41936 |
| C | 2.00705  | -0.46152 | -0.29611 |
| H | 2.48574  | -2.56262 | -0.22306 |
| H | 5.85461  | 0.05294  | -0.72381 |
| H | 1.90901  | 1.69442  | -0.42692 |
| N | 0.61223  | -0.51564 | -0.19573 |
| S | 0.13163  | -3.22474 | 0.23546  |
| H | 0.16527  | 0.41036  | -0.23629 |
| F | 5.63957  | 2.41502  | -1.36285 |
| F | 4.78111  | 2.899    | 0.61328  |
| F | 3.5699   | 3.2508   | -1.19867 |
| F | 4.54523  | -3.66009 | -0.87544 |
| F | 6.30097  | -2.29632 | -1.12504 |
| F | 5.56954  | -2.8198  | 0.89203  |
| C | 4.47774  | 2.38513  | -0.62791 |
| C | 5.15943  | -2.5316  | -0.39018 |
| C | -1.90819 | 2.42179  | -0.64265 |
| C | -3.56717 | 2.8898   | -2.18279 |
| C | -3.71101 | 3.83217  | -1.02093 |
| O | -0.94361 | 1.8759   | -0.06898 |
| C | -2.52144 | 2.0814   | -1.96805 |

|   |          |          |          |
|---|----------|----------|----------|
| O | -4.52373 | 4.7308   | -0.83442 |
| N | -2.64252 | 3.47957  | -0.14791 |
| H | -2.48105 | 3.91511  | 0.75255  |
| H | -2.1336  | 1.29717  | -2.59659 |
| H | -4.19477 | -0.16628 | -0.82146 |
| C | -4.89222 | 1.17144  | 0.57129  |
| C | -5.93286 | 1.69974  | -0.10337 |
| C | -6.44758 | 1.18882  | -1.43649 |
| C | -6.70218 | 2.86538  | 0.48213  |
| H | -4.65616 | 1.53938  | 1.56423  |
| H | -7.47707 | 0.82573  | -1.31338 |
| H | -6.47934 | 1.99301  | -2.18216 |
| H | -5.85078 | 0.36678  | -1.84324 |
| H | -6.45344 | 3.78979  | -0.05872 |
| H | -7.78351 | 2.69933  | 0.40122  |
| H | -6.45176 | 3.01745  | 1.5376   |
| H | -4.23361 | 2.91908  | -3.02779 |
| O | 8.13333  | -0.78187 | 1.99614  |
| H | 7.17861  | -0.69147 | 2.04028  |
| H | 8.36615  | -1.71281 | 1.96878  |
| O | 8.25845  | 1.26837  | 0.73659  |
| H | 7.30374  | 1.35877  | 0.78073  |
| H | 8.49127  | 0.33743  | 0.70923  |
| O | 7.66637  | 3.37291  | -0.68953 |
| H | 6.71166  | 3.46331  | -0.64538 |
| H | 7.89919  | 2.44198  | -0.71689 |



## TS(Water) +3H<sub>2</sub>O

Calculation Type = FREQ

Calculation Method = RB3LYP

Basis Set = 6-31G(d,p)

Charge = 0

Spin = Singlet

Solvation = scrf=solvent=water

E(RB3LYP) = -2779.171 Hartree

RMS Gradient Norm = 3.9e-07 Hartree/Bohr

Temperature = 298.15 Kelvin

Pressure = 1 atm

Frequencies scaled by = 1

Electronic Energy (EE) = -2779.171 Hartree

Zero-point Energy Correction = 0.626631 Hartree

Thermal Correction to Energy = 0.674753 Hartree

Thermal Correction to Enthalpy = 0.675697 Hartree

Thermal Correction to Free Energy = 0.539009 Hartree

EE + Zero-point Energy = -2778.5444 Hartree

EE + Thermal Energy Correction = -2778.4963 Hartree

EE + Thermal Enthalpy Correction = -2778.4953 Hartree

EE + Thermal Free Energy Correction = -2778.632 Hartree

E (Thermal) = 423.414 kcal/mol

Heat Capacity (Cv) = 177.86 cal/mol-kelvin

Entropy (S) = 287.685 cal/mol-kelvin

Symbolic Z-matrix:

Charge = 0 Multiplicity = 1

|   |          |          |         |
|---|----------|----------|---------|
| C | -2.73659 | 0.12686  | 2.5497  |
| C | -3.7398  | -0.78489 | 2.18601 |
| C | -4.40162 | -1.5037  | 3.19167 |
| C | -4.06692 | -1.32521 | 4.53593 |

|   |          |          |          |
|---|----------|----------|----------|
| C | -3.0669  | -0.41648 | 4.89136  |
| C | -2.40685 | 0.30889  | 3.89517  |
| H | -2.21735 | 0.6985   | 1.79189  |
| H | -5.18469 | -2.20415 | 2.92017  |
| H | -4.58888 | -1.88829 | 5.30084  |
| H | -2.80746 | -0.27136 | 5.93355  |
| H | -1.6328  | 1.01815  | 4.16514  |
| C | -3.62157 | -2.59368 | -1.24001 |
| C | -4.62985 | -3.56852 | -1.19778 |
| C | -5.21026 | -4.03928 | -2.37627 |
| C | -4.79014 | -3.5396  | -3.61389 |
| C | -3.78231 | -2.5745  | -3.66309 |
| C | -3.19775 | -2.10525 | -2.48175 |
| H | -4.95685 | -3.96381 | -0.24127 |
| H | -5.98498 | -4.79584 | -2.33044 |
| H | -5.24095 | -3.90442 | -4.52928 |
| H | -3.44556 | -2.18852 | -4.61829 |
| H | -2.40019 | -1.37374 | -2.52581 |
| C | -4.09942 | -1.07401 | 0.73402  |
| C | -3.05912 | -2.05723 | 0.0782   |
| N | -1.82315 | -1.29462 | -0.09544 |
| N | -4.11027 | 0.14436  | -0.11205 |
| H | -2.86965 | -2.8871  | 0.76265  |
| H | -5.07056 | -1.58722 | 0.71698  |
| H | -1.98178 | -0.28518 | -0.21422 |
| C | -0.56307 | -1.78222 | -0.02469 |
| C | 2.63732  | -1.86873 | -0.12341 |
| C | 4.01142  | -1.65104 | -0.22008 |
| C | 4.57606  | -0.38658 | -0.35953 |
| C | 3.69374  | 0.69474  | -0.33753 |
| C | 2.32695  | 0.51765  | -0.23573 |

|   |          |          |          |
|---|----------|----------|----------|
| C | 1.7671   | -0.77173 | -0.15977 |
| H | 2.24809  | -2.86793 | -0.0149  |
| H | 5.67039  | -0.247   | -0.45861 |
| H | 1.66878  | 1.37229  | -0.20065 |
| N | 0.37115  | -0.78723 | -0.10632 |
| S | -0.22475 | -3.4884  | 0.16155  |
| H | -0.02433 | 0.16508  | -0.12554 |
| F | 4.97022  | 2.37496  | -1.46876 |
| F | 5.15501  | 2.22915  | 0.72009  |
| F | 3.28126  | 3.03864  | -0.18235 |
| F | 4.28591  | -4.00347 | -0.03387 |
| F | 5.93034  | -2.83701 | -0.97782 |
| F | 5.59274  | -2.69726 | 1.20028  |
| C | 4.24309  | 2.07103  | -0.31916 |
| C | 4.93658  | -2.79902 | -0.03664 |
| C | -1.09748 | 2.85369  | -0.27946 |
| C | -0.73421 | 5.09489  | -0.69915 |
| C | -2.22229 | 4.83231  | -0.60882 |
| O | -0.88777 | 1.6474   | -0.05512 |
| C | -0.08    | 3.94517  | -0.50767 |
| O | -3.1588  | 5.61844  | -0.72249 |
| N | -2.33594 | 3.44849  | -0.35391 |
| H | -3.22592 | 2.94463  | -0.23966 |
| H | 0.98267  | 3.76161  | -0.49544 |
| H | -4.19964 | -0.08033 | -1.10506 |
| C | -4.77266 | 1.313    | 0.3046   |
| C | -5.25614 | 2.2977   | -0.48416 |
| C | -5.25876 | 2.24753  | -2.00172 |
| C | -5.82986 | 3.56785  | 0.12179  |
| H | -4.82096 | 1.42012  | 1.3831   |
| H | -6.25785 | 2.4976   | -2.38122 |

|   |          |          |          |
|---|----------|----------|----------|
| H | -4.55872 | 2.9837   | -2.4212  |
| H | -4.98751 | 1.26391  | -2.39796 |
| H | -5.2237  | 4.43914  | -0.16522 |
| H | -6.85211 | 3.73984  | -0.24102 |
| H | -5.85585 | 3.51163  | 1.21558  |
| H | -0.33287 | 6.07658  | -0.88637 |
| O | 6.4475   | -0.07721 | 2.13977  |
| H | 5.77729  | 0.62394  | 1.91901  |
| H | 5.99788  | -0.95168 | 1.97726  |
| O | 7.48507  | 0.03124  | -0.32121 |
| H | 7.65191  | 1.00733  | -0.56035 |
| H | 7.30818  | 0.00937  | 0.67684  |
| O | 7.73605  | 2.6156   | -1.01964 |
| H | 6.77041  | 2.74508  | -1.22158 |
| H | 8.20129  | 2.64861  | -1.89737 |

## TS(Water) +4H<sub>2</sub>O

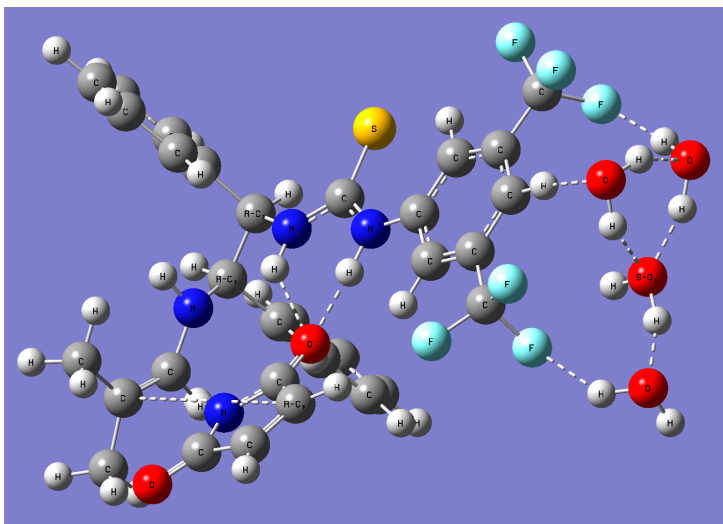

Calculation Type = FREQ

Calculation Method = RB3LYP

Basis Set = 6-31G(d,p)

Charge = 0

Spin = Singlet

Solvation = scrf=solvent=water

E(RB3LYP) = -2855.1919 Hartree

RMS Gradient Norm = 3.93e-07 Hartree/Bohr

Temperature = 298.15 Kelvin

Pressure = 1 atm

Frequencies scaled by = 1

Electronic Energy (EE) = -2855.1919 Hartree

Zero-point Energy Correction = 0.652279 Hartree

Thermal Correction to Energy = 0.702153 Hartree

Thermal Correction to Enthalpy = 0.703097 Hartree

Thermal Correction to Free Energy = 0.563221 Hartree

EE + Zero-point Energy = -2854.5396 Hartree

EE + Thermal Energy Correction = -2854.4897 Hartree

EE + Thermal Enthalpy Correction = -2854.4888 Hartree

EE + Thermal Free Energy Correction = -2854.6287 Hartree

E (Thermal) = 440.608 kcal/mol

Heat Capacity (Cv) = 184.729 cal/mol-kelvin

Entropy (S) = 294.394 cal/mol-kelvin

Symbolic Z-matrix:

Charge = 0 Multiplicity = 1

|   |          |          |          |
|---|----------|----------|----------|
| C | -2.82374 | 0.34655  | 2.59229  |
| C | -3.86205 | -0.56515 | 2.34542  |
| C | -4.49101 | -1.18894 | 3.43239  |
| C | -4.0898  | -0.9175  | 4.74248  |
| C | -3.05517 | -0.00945 | 4.98146  |
| C | -2.42747 | 0.6217   | 3.90359  |
| H | -2.32836 | 0.8465   | 1.77046  |
| H | -5.30079 | -1.88823 | 3.25135  |
| H | -4.58717 | -1.40783 | 5.57121  |
| H | -2.744   | 0.2079   | 5.9966   |
| H | -1.62675 | 1.3301   | 4.08294  |
| C | -3.94657 | -2.62976 | -0.93577 |
| C | -4.97517 | -3.57062 | -0.77565 |
| C | -5.61971 | -4.11263 | -1.88833 |
| C | -5.2442  | -3.71921 | -3.17753 |
| C | -4.21636 | -2.78889 | -3.34394 |
| C | -3.56751 | -2.24834 | -2.22845 |
| H | -5.26773 | -3.88414 | 0.22143  |
| H | -6.40951 | -4.84205 | -1.75115 |
| H | -5.74472 | -4.13932 | -4.04196 |
| H | -3.91375 | -2.48576 | -4.33959 |
| H | -2.75441 | -1.5455  | -2.36305 |
| C | -4.29688 | -0.95399 | 0.93775  |
| C | -3.31195 | -2.01203 | 0.3122   |

|   |          |          |          |
|---|----------|----------|----------|
| N | -2.06718 | -1.29831 | 0.02921  |
| N | -4.31891 | 0.19587  | 0.00115  |
| H | -3.11223 | -2.79378 | 1.04851  |
| H | -5.2795  | -1.44069 | 1.00512  |
| H | -2.20588 | -0.29555 | -0.15227 |
| C | -0.81687 | -1.81376 | 0.08017  |
| C | 2.35915  | -2.00569 | -0.2531  |
| C | 3.73675  | -1.83622 | -0.40419 |
| C | 4.34917  | -0.58669 | -0.50519 |
| C | 3.50119  | 0.5225   | -0.44336 |
| C | 2.13153  | 0.38906  | -0.29778 |
| C | 1.53167  | -0.87918 | -0.20082 |
| H | 1.93067  | -2.99349 | -0.19644 |
| H | 5.44256  | -0.47349 | -0.68999 |
| H | 1.5      | 1.26451  | -0.26215 |
| N | 0.13723  | -0.85189 | -0.09456 |
| S | -0.51412 | -3.51399 | 0.36511  |
| H | -0.2333  | 0.10887  | -0.15046 |
| F | 5.14555  | 1.95852  | -1.36659 |
| F | 4.50604  | 2.39121  | 0.70471  |
| F | 3.12744  | 2.82031  | -0.95637 |
| F | 3.88063  | -4.17216 | -0.82175 |
| F | 5.67901  | -2.9147  | -1.24386 |
| F | 5.10644  | -3.37338 | 0.83363  |
| C | 4.06125  | 1.89479  | -0.53426 |
| C | 4.5789   | -3.05959 | -0.43955 |
| C | -1.24962 | 2.78255  | -0.53884 |
| C | -0.85404 | 4.93435  | -1.27489 |
| C | -2.34062 | 4.73634  | -1.06687 |
| O | -1.05909 | 1.6103   | -0.16539 |
| C | -0.21946 | 3.79833  | -0.9687  |

|   |          |          |          |
|---|----------|----------|----------|
| O | -3.26281 | 5.53031  | -1.23185 |
| N | -2.47432 | 3.40269  | -0.62405 |
| H | -3.36947 | 2.94538  | -0.40358 |
| H | 0.83624  | 3.57827  | -0.99652 |
| H | -4.46149 | -0.1023  | -0.96576 |
| C | -4.92908 | 1.41331  | 0.35215  |
| C | -5.42519 | 2.34421  | -0.49231 |
| C | -5.50563 | 2.17055  | -1.99858 |
| C | -5.93244 | 3.67829  | 0.02925  |
| H | -4.92011 | 1.60948  | 1.41913  |
| H | -6.51978 | 2.40509  | -2.34707 |
| H | -4.81965 | 2.86014  | -2.51032 |
| H | -5.26627 | 1.15428  | -2.32715 |
| H | -5.32438 | 4.50192  | -0.37203 |
| H | -6.97022 | 3.84683  | -0.28844 |
| H | -5.89403 | 3.72089  | 1.12323  |
| H | -0.43941 | 5.86817  | -1.61536 |
| O | 7.88566  | -1.91377 | 1.39852  |
| H | 7.72367  | -1.38615 | 2.22463  |
| H | 7.12341  | -2.55219 | 1.33998  |
| O | 7.46651  | -0.21406 | -0.64777 |
| H | 7.48662  | 0.69207  | -0.17292 |
| H | 7.69162  | -0.86306 | 0.10849  |
| O | 7.28255  | 1.92869  | 0.92393  |
| H | 6.97062  | 2.79559  | 0.49167  |
| H | 6.44551  | 1.56962  | 1.32158  |
| O | 6.45065  | 4.35166  | 0.46941  |
| H | 6.76208  | 4.39931  | 1.41606  |
| H | 5.45978  | 4.33143  | 0.5609   |



## TS(Water) +5H<sub>2</sub>O

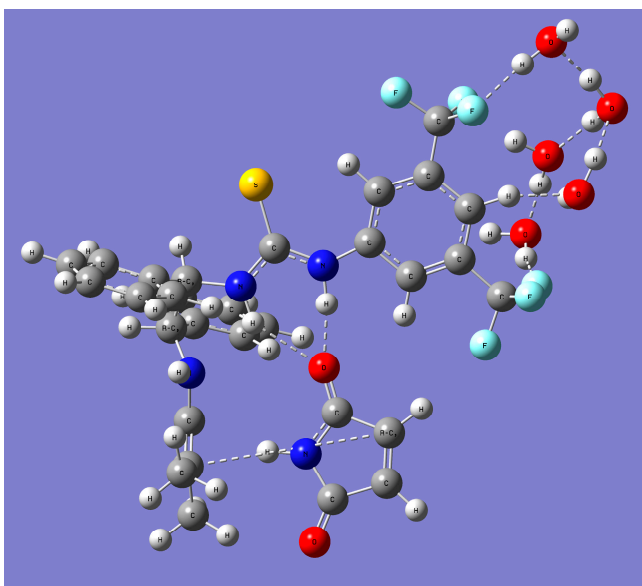

Calculation Type = FREQ

Calculation Method = RB3LYP

Basis Set = 6-31G(d,p)

Charge = 0

Spin = Singlet

Solvation = scrf=solvent=water

E(RB3LYP) = -2931.2015 Hartree

RMS Gradient Norm = 6.94e-07 Hartree/Bohr

Temperature = 298.15 Kelvin

Pressure = 1 atm

Frequencies scaled by = 1

Electronic Energy (EE) = -2931.2015 Hartree

Zero-point Energy Correction = 0.677019 Hartree

Thermal Correction to Energy = 0.729465 Hartree

Thermal Correction to Enthalpy = 0.730409 Hartree

Thermal Correction to Free Energy = 0.584429 Hartree

EE + Zero-point Energy = -2930.5245 Hartree

EE + Thermal Energy Correction = -2930.472 Hartree  
 EE + Thermal Enthalpy Correction = -2930.4711 Hartree  
 EE + Thermal Free Energy Correction = -2930.6171 Hartree  
 E (Thermal) = 457.746 kcal/mol  
 Heat Capacity (Cv) = 192.946 cal/mol-kelvin  
 Entropy (S) = 307.243 cal/mol-kelvin

Symbolic Z-matrix:

Charge = 0 Multiplicity = 1

|   |          |          |          |
|---|----------|----------|----------|
| C | -2.85292 | 0.35827  | 2.63683  |
| C | -3.85632 | -0.58871 | 2.37822  |
| C | -4.47943 | -1.23081 | 3.45797  |
| C | -4.10643 | -0.94326 | 4.77282  |
| C | -3.10644 | -0.00029 | 5.02383  |
| C | -2.48524 | 0.64922  | 3.9532   |
| H | -2.36141 | 0.87383  | 1.82202  |
| H | -5.26261 | -1.95736 | 3.26724  |
| H | -4.59881 | -1.44827 | 5.59567  |
| H | -2.81723 | 0.22975  | 6.04266  |
| H | -1.71154 | 1.38467  | 4.14204  |
| C | -3.83861 | -2.67278 | -0.89168 |
| C | -4.841   | -3.64369 | -0.74627 |
| C | -5.45626 | -4.20092 | -1.86808 |
| C | -5.07719 | -3.793   | -3.15166 |
| C | -4.07515 | -2.83253 | -3.30344 |
| C | -3.4557  | -2.27651 | -2.17892 |
| H | -5.13616 | -3.96852 | 0.24641  |
| H | -6.22606 | -4.95339 | -1.74228 |
| H | -5.55498 | -4.22491 | -4.0231  |
| H | -3.76982 | -2.51765 | -4.29459 |
| H | -2.6622  | -1.54972 | -2.30259 |

|   |          |          |          |
|---|----------|----------|----------|
| C | -4.25898 | -0.99777 | 0.96682  |
| C | -3.23982 | -2.03757 | 0.36529  |
| N | -2.00761 | -1.29565 | 0.1013   |
| N | -4.29415 | 0.14433  | 0.01966  |
| H | -3.03658 | -2.8116  | 1.10875  |
| H | -5.23096 | -1.50672 | 1.02173  |
| H | -2.17118 | -0.29734 | -0.08132 |
| C | -0.74629 | -1.78167 | 0.15334  |
| C | 2.42697  | -1.89155 | -0.25461 |
| C | 3.78501  | -1.68502 | -0.49409 |
| C | 4.34589  | -0.42145 | -0.6662  |
| C | 3.48379  | 0.66895  | -0.53903 |
| C | 2.13314  | 0.49897  | -0.28973 |
| C | 1.57178  | -0.78525 | -0.16968 |
| H | 2.0336   | -2.89013 | -0.15071 |
| H | 5.41238  | -0.29736 | -0.91474 |
| H | 1.48329  | 1.35724  | -0.19833 |
| N | 0.18416  | -0.79233 | -0.00247 |
| S | -0.4019  | -3.4766  | 0.41216  |
| H | -0.20848 | 0.16112  | -0.02563 |
| F | 5.14173  | 2.16842  | -1.34938 |
| F | 4.35301  | 2.52086  | 0.68788  |
| F | 3.07069  | 2.95458  | -1.06305 |
| F | 4.02334  | -4.03352 | -0.76349 |
| F | 5.71918  | -2.72339 | -1.39576 |
| F | 5.3037   | -3.04547 | 0.74667  |
| C | 4.00733  | 2.05747  | -0.59668 |
| C | 4.68864  | -2.86551 | -0.50198 |
| C | -1.26025 | 2.77906  | -0.55089 |
| C | -0.97981 | 4.81936  | -1.5956  |
| C | -2.45326 | 4.57419  | -1.34893 |

|   |          |          |          |
|---|----------|----------|----------|
| O | -1.00804 | 1.67885  | -0.02407 |
| C | -0.28551 | 3.77441  | -1.13337 |
| O | -3.42208 | 5.27412  | -1.63351 |
| N | -2.51381 | 3.32045  | -0.70516 |
| H | -3.38907 | 2.85694  | -0.42485 |
| H | 0.77972  | 3.60511  | -1.14323 |
| H | -4.42806 | -0.16885 | -0.94382 |
| C | -4.94605 | 1.34602  | 0.35706  |
| C | -5.42875 | 2.27622  | -0.4951  |
| C | -5.44044 | 2.13733  | -2.00727 |
| C | -6.0051  | 3.58343  | 0.021    |
| H | -4.98213 | 1.53197  | 1.42518  |
| H | -6.47423 | 2.13158  | -2.37851 |
| H | -4.93679 | 2.99922  | -2.46588 |
| H | -4.94757 | 1.2279   | -2.36389 |
| H | -5.43504 | 4.42845  | -0.39012 |
| H | -7.0486  | 3.70043  | -0.30223 |
| H | -5.97376 | 3.63493  | 1.11451  |
| H | -0.61573 | 5.7125   | -2.07475 |
| O | 7.65068  | -1.37927 | 1.01536  |
| H | 7.32021  | -0.4732  | 1.37224  |
| H | 6.86961  | -1.99351 | 1.05601  |
| O | 7.2328   | 0.04668  | -1.14458 |
| H | 7.02767  | 0.76326  | -0.47071 |
| H | 7.51959  | -0.69758 | -0.49498 |
| O | 6.62367  | 0.98424  | 1.37894  |
| H | 6.87655  | 1.97523  | 1.57484  |
| H | 5.64483  | 0.92634  | 1.5151   |
| O | 6.80736  | 3.50844  | 1.65478  |
| H | 6.76881  | 3.867    | 2.57993  |
| H | 5.90749  | 3.65099  | 1.25385  |

|   |         |          |          |
|---|---------|----------|----------|
| O | 6.40225 | -4.56686 | -0.53906 |
| H | 7.36225 | -4.56686 | -0.53906 |
| H | 6.0818  | -3.66192 | -0.53906 |

# **TS(CH<sub>2</sub>Cl<sub>2</sub>) +5H<sub>2</sub>O**

Calculation Type = FREQ

Calculation Method = RB3LYP

Basis Set = 6-31G(d,p)

Charge = 0

Spin = Singlet

Solvation = scrf=solvent=dichloromethane

E(RB3LYP) = -2931.1925 Hartree

RMS Gradient Norm = 1.293e-06 Hartree/Bohr

Temperature = 298.15 Kelvin

Pressure = 1 atm

Frequencies scaled by = 1

Electronic Energy (EE) = -2931.1925 Hartree

Zero-point Energy Correction = 0.67728 Hartree

Thermal Correction to Energy = 0.729695 Hartree

Thermal Correction to Enthalpy = 0.730639 Hartree

Thermal Correction to Free Energy = 0.584691 Hartree

EE + Zero-point Energy = -2930.5152 Hartree

EE + Thermal Energy Correction = -2930.4628 Hartree

EE + Thermal Enthalpy Correction = -2930.4618 Hartree

EE + Thermal Free Energy Correction = -2930.6078 Hartree

E (Thermal) = 457.89 kcal/mol

Heat Capacity (Cv) = 192.928 cal/mol-kelvin

Entropy (S) = 307.172 cal/mol-kelvin

Symbolic Z-matrix:

Charge = 0 Multiplicity = 1

|   |          |          |          |
|---|----------|----------|----------|
| C | -3.12237 | 0.21549  | 2.56869  |
| C | -4.02674 | -0.82673 | 2.31271  |
| C | -4.6002  | -1.50913 | 3.39487  |
| C | -4.27494 | -1.1673  | 4.70921  |
| C | -3.37401 | -0.12898 | 4.95721  |
| C | -2.80283 | 0.56073  | 3.8841   |
| H | -2.67237 | 0.76188  | 1.75033  |
| H | -5.30746 | -2.31036 | 3.20641  |
| H | -4.72764 | -1.70505 | 5.53406  |
| H | -3.12263 | 0.14308  | 5.97569  |
| H | -2.10596 | 1.36986  | 4.07099  |
| C | -3.77053 | -2.92878 | -0.93502 |
| C | -4.6699  | -3.99436 | -0.78125 |
| C | -5.22138 | -4.62367 | -1.89775 |
| C | -4.88117 | -4.19385 | -3.18486 |
| C | -3.98127 | -3.13863 | -3.34514 |
| C | -3.42555 | -2.51035 | -2.22565 |
| H | -4.93211 | -4.33763 | 0.21454  |
| H | -5.91024 | -5.44986 | -1.76527 |
| H | -5.30855 | -4.68261 | -4.05243 |
| H | -3.70441 | -2.80715 | -4.33929 |
| H | -2.70659 | -1.71061 | -2.35496 |
| C | -4.37045 | -1.28988 | 0.90291  |
| C | -3.24445 | -2.22152 | 0.31594  |
| N | -2.09645 | -1.35794 | 0.04528  |
| N | -4.51826 | -0.16641 | -0.05544 |
| H | -2.96162 | -2.96288 | 1.06669  |
| H | -5.28459 | -1.897   | 0.95581  |
| H | -2.35857 | -0.383   | -0.14776 |

|   |          |          |          |
|---|----------|----------|----------|
| C | -0.79195 | -1.71608 | 0.10495  |
| C | 2.3812   | -1.5075  | -0.24877 |
| C | 3.71768  | -1.16206 | -0.45637 |
| C | 4.14989  | 0.14589  | -0.65378 |
| C | 3.17478  | 1.14306  | -0.58794 |
| C | 1.84354  | 0.8381   | -0.37143 |
| C | 1.41474  | -0.49477 | -0.22374 |
| H | 2.0923   | -2.53722 | -0.11087 |
| H | 5.20789  | 0.41528  | -0.82925 |
| H | 1.10767  | 1.62582  | -0.31955 |
| N | 0.03343  | -0.63892 | -0.07698 |
| S | -0.27942 | -3.35754 | 0.39774  |
| H | -0.45475 | 0.26686  | -0.12747 |
| F | 4.24932  | 2.85176  | -1.86084 |
| F | 4.41648  | 2.962    | 0.33312  |
| F | 2.47502  | 3.41596  | -0.65005 |
| F | 4.22439  | -3.48673 | -0.4178  |
| F | 5.68165  | -2.10926 | -1.40803 |
| F | 5.50906  | -2.13703 | 0.78521  |
| C | 3.56841  | 2.57205  | -0.71523 |
| C | 4.74367  | -2.22844 | -0.38107 |
| C | -1.78804 | 2.81248  | -0.54317 |
| C | -1.67648 | 4.99213  | -1.29771 |
| C | -3.12585 | 4.59127  | -1.12274 |
| O | -1.4431  | 1.68118  | -0.15344 |
| C | -0.89854 | 3.9583   | -0.96174 |
| O | -4.14477 | 5.24597  | -1.3232  |
| N | -3.08413 | 3.25646  | -0.6624  |
| H | -3.91536 | 2.68384  | -0.45815 |
| H | 0.1778   | 3.8871   | -0.96041 |
| H | -4.60743 | -0.50018 | -1.01727 |



|   |          |          |          |
|---|----------|----------|----------|
| C | -5.29007 | 0.96571  | 0.26363  |
| C | -5.8631  | 1.82904  | -0.60343 |
| C | -5.85758 | 1.65588  | -2.11184 |
| C | -6.57167 | 3.07796  | -0.10666 |
| H | -5.3516  | 1.15968  | 1.32925  |
| H | -6.88739 | 1.65654  | -2.49268 |
| H | -5.33435 | 2.49263  | -2.5953  |
| H | -5.3799  | 0.72702  | -2.43841 |
| H | -6.07319 | 3.97834  | -0.49306 |
| H | -7.61151 | 3.09694  | -0.45991 |
| H | -6.57818 | 3.12616  | 0.98767  |
| H | -1.38737 | 5.97126  | -1.64085 |
| O | 8.72488  | 0.10311  | 0.29812  |
| H | 8.09547  | 0.2106   | 1.08851  |
| H | 8.66537  | -0.87553 | 0.00872  |
| O | 6.74511  | 1.39203  | -0.74668 |
| H | 6.46087  | 1.44625  | 0.21386  |
| H | 7.63602  | 0.8738   | -0.59199 |
| O | 6.56884  | 0.4029   | 1.81587  |
| H | 5.94014  | 0.98249  | 2.39802  |
| H | 6.08279  | -0.41947 | 1.55286  |
| O | 4.81444  | 1.92497  | 2.91551  |
| H | 4.03252  | 1.4398   | 3.28657  |
| H | 4.5115   | 2.36794  | 2.07597  |
| O | 8.38874  | -2.37376 | -0.595   |
| H | 8.93514  | -2.47995 | -1.41764 |
| H | 7.4415   | -2.33431 | -0.8979  |

## TS(THF) +5H<sub>2</sub>O

Calculation Type = FREQ

Calculation Method = RB3LYP

Basis Set = 6-31G(d,p)

Charge = 0

Spin = Singlet

Solvation = scrf=solvent=thf

E(RB3LYP) = -2931.1907 Hartree

RMS Gradient Norm = 1.46e-06 Hartree/Bohr

Temperature = 298.15 Kelvin

Pressure = 1 atm

Frequencies scaled by = 1

Electronic Energy (EE) = -2931.1907 Hartree

Zero-point Energy Correction = 0.677318 Hartree

Thermal Correction to Energy = 0.729724 Hartree

Thermal Correction to Enthalpy = 0.730668 Hartree

Thermal Correction to Free Energy = 0.585007 Hartree

EE + Zero-point Energy = -2930.5134 Hartree

EE + Thermal Energy Correction = -2930.461 Hartree

EE + Thermal Enthalpy Correction = -2930.46 Hartree

EE + Thermal Free Energy Correction = -2930.6057 Hartree

E (Thermal) = 457.909 kcal/mol

Heat Capacity (Cv) = 192.946 cal/mol-kelvin

Entropy (S) = 306.568 cal/mol-kelvin

Symbolic Z-matrix:

Charge = 0 Multiplicity = 1

|   |          |          |         |
|---|----------|----------|---------|
| C | -3.13167 | 0.21987  | 2.56732 |
| C | -4.03515 | -0.82283 | 2.31028 |
| C | -4.61319 | -1.50222 | 3.39186 |
| C | -4.29329 | -1.15712 | 4.7066  |

|   |          |          |          |
|---|----------|----------|----------|
| C | -3.39325 | -0.11834 | 4.95563  |
| C | -2.81758 | 0.56846  | 3.88311  |
| H | -2.67808 | 0.76403  | 1.74948  |
| H | -5.31984 | -2.3038  | 3.2026   |
| H | -4.74942 | -1.69271 | 5.53096  |
| H | -3.14599 | 0.15626  | 5.97442  |
| H | -2.12131 | 1.37792  | 4.07085  |
| C | -3.76821 | -2.93182 | -0.93215 |
| C | -4.66871 | -3.99646 | -0.77895 |
| C | -5.2175  | -4.62749 | -1.89575 |
| C | -4.87341 | -4.20033 | -3.18267 |
| C | -3.97225 | -3.14616 | -3.34241 |
| C | -3.41931 | -2.51616 | -2.22256 |
| H | -4.93352 | -4.338   | 0.21676  |
| H | -5.90709 | -5.45312 | -1.76368 |
| H | -5.29854 | -4.69055 | -4.05052 |
| H | -3.69201 | -2.81711 | -4.33642 |
| H | -2.69879 | -1.7177  | -2.35115 |
| C | -4.37347 | -1.28952 | 0.9004   |
| C | -3.24542 | -2.22221 | 0.31891  |
| N | -2.09706 | -1.35887 | 0.04986  |
| N | -4.51868 | -0.16841 | -0.06133 |
| H | -2.96439 | -2.9621  | 1.07183  |
| H | -5.28772 | -1.89666 | 0.9515   |
| H | -2.3591  | -0.38446 | -0.14514 |
| C | -0.79235 | -1.71677 | 0.11361  |
| C | 2.38008  | -1.50677 | -0.24316 |
| C | 3.71622  | -1.16068 | -0.45187 |
| C | 4.14836  | 0.14778  | -0.64646 |
| C | 3.17336  | 1.14475  | -0.5767  |
| C | 1.84233  | 0.83925  | -0.35914 |

|   |          |          |          |
|---|----------|----------|----------|
| C | 1.41367  | -0.49396 | -0.21437 |
| H | 2.09112  | -2.5368  | -0.10744 |
| H | 5.20639  | 0.41814  | -0.82357 |
| H | 1.10635  | 1.62674  | -0.30483 |
| N | 0.03255  | -0.63865 | -0.06749 |
| S | -0.27955 | -3.35654 | 0.40991  |
| H | -0.45591 | 0.26675  | -0.11746 |
| F | 4.24449  | 2.8578   | -1.84729 |
| F | 4.41634  | 2.96153  | 0.34683  |
| F | 2.47271  | 3.41752  | -0.63081 |
| F | 4.22292  | -3.48548 | -0.41832 |
| F | 5.67527  | -2.10728 | -1.41441 |
| F | 5.51392  | -2.13718 | 0.7796   |
| C | 3.56679  | 2.5741   | -0.70123 |
| C | 4.74243  | -2.22735 | -0.38277 |
| C | -1.78554 | 2.81473  | -0.54136 |
| C | -1.67297 | 4.99166  | -1.30374 |
| C | -3.12272 | 4.58971  | -1.13418 |
| O | -1.44074 | 1.68526  | -0.14617 |
| C | -0.89539 | 3.96007  | -0.96004 |
| O | -4.14147 | 5.24207  | -1.34243 |
| N | -3.08152 | 3.25671  | -0.66813 |
| H | -3.91334 | 2.68399  | -0.46588 |
| H | 0.18102  | 3.88999  | -0.95338 |
| H | -4.60595 | -0.50532 | -1.02224 |
| C | -5.29097 | 0.96473  | 0.25278  |
| C | -5.85774 | 1.82869  | -0.61779 |
| C | -5.84314 | 1.65591  | -2.12622 |
| C | -6.5708  | 3.07679  | -0.12545 |
| H | -5.35887 | 1.15889  | 1.31799  |
| H | -6.87107 | 1.64291  | -2.51201 |

|   |          |          |          |
|---|----------|----------|----------|
| H | -5.32918 | 2.50014  | -2.60654 |
| H | -5.35126 | 0.73389  | -2.45111 |
| H | -6.07247 | 3.97766  | -0.51082 |
| H | -7.60914 | 3.09338  | -0.48326 |
| H | -6.58244 | 3.12609  | 0.96879  |
| H | -1.38347 | 5.96979  | -1.64941 |
| O | 8.72994  | 0.10329  | 0.27787  |
| H | 8.11025  | 0.20888  | 1.07578  |
| H | 8.66892  | -0.875   | -0.01166 |
| O | 6.73951  | 1.39173  | -0.74472 |
| H | 6.46577  | 1.44511  | 0.21884  |
| H | 7.63344  | 0.87546  | -0.6     |
| O | 6.58666  | 0.39481  | 1.81733  |
| H | 5.95717  | 0.97089  | 2.40129  |
| H | 6.10097  | -0.42646 | 1.55012  |
| O | 4.82394  | 1.90684  | 2.92025  |
| H | 4.04274  | 1.41729  | 3.28696  |
| H | 4.52166  | 2.35458  | 2.08299  |
| O | 8.38672  | -2.37232 | -0.6177  |
| H | 8.92869  | -2.47593 | -1.44356 |
| H | 7.4378   | -2.33142 | -0.91511 |

**Figure 3.**

**TS(Gas) + 5H<sub>2</sub>O**

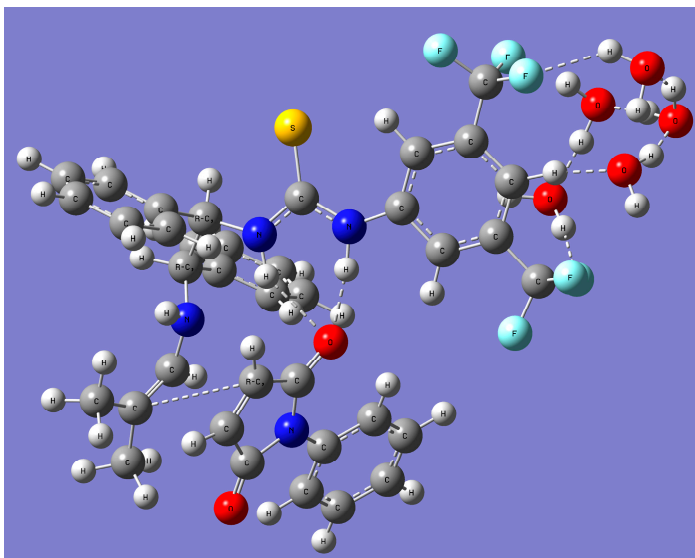

Calculation Type = FREQ

Calculation Method = RB3LYP

Basis Set = 6-31G(d,p)

Charge = 0

Spin = Singlet

Solvation = None

E(RB3LYP) = -3160.9475 Hartree

RMS Gradient Norm = 1.42e-07 Hartree/Bohr

Temperature = 298.15 Kelvin

Pressure = 1 atm

Frequencies scaled by = 1

Electronic Energy (EE) = -3160.9475 Hartree

Zero-point Energy Correction = 0.75884 Hartree

Thermal Correction to Energy = 0.814779 Hartree

Thermal Correction to Enthalpy = 0.815723 Hartree

Thermal Correction to Free Energy = 0.660379 Hartree

EE + Zero-point Energy = -3160.1886 Hartree

EE + Thermal Energy Correction = -3160.1327 Hartree  
 EE + Thermal Enthalpy Correction = -3160.1317 Hartree  
 EE + Thermal Free Energy Correction = -3160.2871 Hartree  
 E (Thermal) = 511.282 kcal/mol  
 Heat Capacity (Cv) = 209.304 cal/mol-kelvin  
 Entropy (S) = 326.949 cal/mol-kelvin

Symbolic Z-matrix:

Charge = 0 Multiplicity = 1

|   |         |          |          |
|---|---------|----------|----------|
| C | 2.67135 | -0.37866 | 2.27695  |
| C | 3.46932 | 0.7741   | 2.32576  |
| C | 4.01466 | 1.16863  | 3.55649  |
| C | 3.76706 | 0.43327  | 4.71773  |
| C | 2.97651 | -0.71749 | 4.66011  |
| C | 2.43376 | -1.12065 | 3.43705  |
| H | 2.23258 | -0.70878 | 1.34584  |
| H | 4.64036 | 2.05392  | 3.60405  |
| H | 4.19706 | 0.75284  | 5.65985  |
| H | 2.78972 | -1.29634 | 5.5571   |
| H | 1.82883 | -2.01824 | 3.37907  |
| C | 2.97449 | 3.69365  | -0.1753  |
| C | 3.74277 | 4.75668  | 0.32284  |
| C | 4.22791 | 5.74413  | -0.53557 |
| C | 3.95166 | 5.68035  | -1.9057  |
| C | 3.18164 | 4.62889  | -2.40687 |
| C | 2.69178 | 3.64124  | -1.54538 |
| H | 3.95657 | 4.81431  | 1.38547  |
| H | 4.81625 | 6.5626   | -0.13738 |
| H | 4.32856 | 6.44641  | -2.573   |
| H | 2.95575 | 4.57715  | -3.46564 |
| H | 2.07471 | 2.84179  | -1.93635 |

|   |          |          |          |
|---|----------|----------|----------|
| C | 3.73623  | 1.64744  | 1.10737  |
| C | 2.52633  | 2.59581  | 0.79248  |
| N | 1.4668   | 1.74626  | 0.24901  |
| N | 4.00052  | 0.84791  | -0.13506 |
| H | 2.175    | 3.04869  | 1.72236  |
| H | 4.59319  | 2.29492  | 1.33384  |
| H | 1.82661  | 0.89845  | -0.19711 |
| C | 0.1343   | 1.94905  | 0.36347  |
| C | -2.98852 | 1.60667  | 0.00795  |
| C | -4.32    | 1.25505  | -0.21104 |
| C | -4.69608 | 0.02995  | -0.75013 |
| C | -3.66877 | -0.86185 | -1.06217 |
| C | -2.33406 | -0.54837 | -0.85315 |
| C | -1.9686  | 0.70173  | -0.31486 |
| H | -2.74146 | 2.57397  | 0.414    |
| H | -5.74605 | -0.23964 | -0.95571 |
| H | -1.5656  | -1.26447 | -1.11491 |
| N | -0.59247 | 0.91882  | -0.17128 |
| S | -0.50681 | 3.38302  | 1.13564  |
| H | -0.01959 | 0.12482  | -0.50294 |
| F | -5.00827 | -2.15595 | -2.5483  |
| F | -4.52801 | -3.04714 | -0.5919  |
| F | -2.93743 | -2.85411 | -2.12265 |
| F | -4.91467 | 3.50705  | 0.24341  |
| F | -6.47204 | 2.16958  | -0.63433 |
| F | -5.86997 | 1.9532   | 1.48192  |
| C | -4.019   | -2.20461 | -1.59459 |
| C | -5.37239 | 2.21924  | 0.20243  |
| C | 2.12938  | -1.47314 | -1.46164 |
| C | 3.68678  | -1.28128 | -3.14593 |
| C | 4.03995  | -2.4621  | -2.29753 |



|   |          |          |          |
|---|----------|----------|----------|
| O | 1.15575  | -1.20941 | -0.72425 |
| C | 2.57708  | -0.71421 | -2.66633 |
| O | 4.98727  | -3.23266 | -2.42183 |
| N | 3.01586  | -2.53797 | -1.28167 |
| H | 2.04071  | 0.14572  | -3.02994 |
| H | 4.07898  | 1.47879  | -0.93913 |
| C | 5.05025  | -0.10902 | -0.07585 |
| C | 6.07951  | -0.24033 | -0.93432 |
| C | 6.38763  | 0.71708  | -2.07009 |
| C | 7.04461  | -1.4     | -0.79066 |
| H | 4.94762  | -0.80391 | 0.75057  |
| H | 7.39575  | 1.13153  | -1.93467 |
| H | 6.38028  | 0.19772  | -3.03634 |
| H | 5.68601  | 1.55415  | -2.12948 |
| H | 6.90336  | -2.11293 | -1.61476 |
| H | 8.08295  | -1.04648 | -0.8205  |
| H | 6.88369  | -1.93856 | 0.14951  |
| H | 4.28026  | -0.99785 | -3.99798 |
| O | -8.51282 | -1.27177 | 0.74586  |
| H | -7.80545 | -1.02147 | 1.49375  |
| H | -8.9445  | -0.39523 | 0.4263   |
| O | -7.35031 | -0.95339 | -1.38066 |
| H | -7.17521 | -1.65982 | -2.05026 |
| H | -7.78112 | -1.33992 | -0.43332 |
| O | -6.69572 | -0.62583 | 2.40492  |
| H | -5.89955 | -1.28357 | 2.30299  |
| H | -6.37643 | 0.27083  | 2.12687  |
| O | -4.70943 | -2.23599 | 2.06595  |
| H | -3.83727 | -1.84166 | 2.32264  |
| H | -4.62985 | -2.53607 | 1.12016  |
| O | -9.03486 | 0.83283  | -0.73073 |

|   |          |          |          |
|---|----------|----------|----------|
| H | -8.4381  | 0.2015   | -1.2972  |
| H | -8.38917 | 1.52306  | -0.41957 |
| C | 2.93846  | -3.53536 | -0.25208 |
| C | 1.72242  | -3.78625 | 0.40676  |
| C | 4.07623  | -4.27906 | 0.10316  |
| C | 1.65584  | -4.75644 | 1.40703  |
| H | 0.84636  | -3.21365 | 0.15208  |
| C | 3.99335  | -5.24841 | 1.10283  |
| H | 5.00522  | -4.11738 | -0.41731 |
| C | 2.78786  | -5.49248 | 1.76309  |
| H | 0.70976  | -4.93605 | 1.90397  |
| H | 4.88099  | -5.81299 | 1.36274  |
| H | 2.73047  | -6.24493 | 2.54016  |

**TS(Toluene) +5H<sub>2</sub>O**

Calculation Type = FREQ

Calculation Method = RB3LYP

Basis Set = 6-31G(d,p)

Charge = 0

Spin = Singlet

Solvation = scrf=solvent=toluene

E(RB3LYP) = -3160.9659 Hartree

RMS Gradient Norm = 3.53e-07 Hartree/Bohr

Temperature = 298.15 Kelvin

Pressure = 1 atm

Frequencies scaled by = 1

Electronic Energy (EE) = -3160.9659 Hartree

Zero-point Energy Correction = 0.759077 Hartree

Thermal Correction to Energy = 0.814822 Hartree

Thermal Correction to Enthalpy = 0.815766 Hartree

Thermal Correction to Free Energy = 0.662255 Hartree

EE + Zero-point Energy = -3160.2069 Hartree

EE + Thermal Energy Correction = -3160.1511 Hartree

EE + Thermal Enthalpy Correction = -3160.1502 Hartree

EE + Thermal Free Energy Correction = -3160.3037 Hartree

E (Thermal) = 511.308 kcal/mol

Heat Capacity (Cv) = 209.089 cal/mol-kelvin

Entropy (S) = 323.092 cal/mol-kelvin

Symbolic Z-matrix:

Charge = 0 Multiplicity = 1

|   |         |          |         |
|---|---------|----------|---------|
| C | 2.75062 | -0.45199 | 2.23246 |
| C | 3.49809 | 0.72989  | 2.33721 |
| C | 4.00745 | 1.09906  | 3.59048 |
| C | 3.77365 | 0.31151  | 4.71877 |

|   |          |          |          |
|---|----------|----------|----------|
| C | 3.03523  | -0.86833 | 4.60472  |
| C | 2.52903  | -1.24707 | 3.35929  |
| H | 2.33948  | -0.76473 | 1.28285  |
| H | 4.59563  | 2.00657  | 3.68166  |
| H | 4.17419  | 0.61338  | 5.67947  |
| H | 2.86027  | -1.48829 | 5.47617  |
| H | 1.96561  | -2.1673  | 3.25752  |
| C | 2.99138  | 3.69755  | -0.10376 |
| C | 3.75229  | 4.74873  | 0.42799  |
| C | 4.25444  | 5.75193  | -0.40069 |
| C | 4.00235  | 5.71732  | -1.77579 |
| C | 3.23636  | 4.68064  | -2.31092 |
| C | 2.73071  | 3.67719  | -1.47834 |
| H | 3.94097  | 4.78794  | 1.49626  |
| H | 4.8341   | 6.56279  | 0.02479  |
| H | 4.38989  | 6.49771  | -2.41991 |
| H | 3.02073  | 4.65787  | -3.37302 |
| H | 2.10572  | 2.89465  | -1.88999 |
| C | 3.75566  | 1.65485  | 1.15646  |
| C | 2.53067  | 2.57604  | 0.83118  |
| N | 1.50181  | 1.71933  | 0.24405  |
| N | 4.08011  | 0.9167   | -0.11053 |
| H | 2.13899  | 3.00615  | 1.75633  |
| H | 4.58694  | 2.3202   | 1.42472  |
| H | 1.87846  | 0.87145  | -0.1973  |
| C | 0.16063  | 1.90524  | 0.37088  |
| C | -2.94169 | 1.5997   | -0.10294 |
| C | -4.27507 | 1.2446   | -0.30251 |
| C | -4.66453 | -0.02818 | -0.70804 |
| C | -3.64578 | -0.95959 | -0.91501 |
| C | -2.30814 | -0.64314 | -0.72269 |

|   |          |          |          |
|---|----------|----------|----------|
| C | -1.93102 | 0.64963  | -0.31025 |
| H | -2.68389 | 2.60092  | 0.20317  |
| H | -5.71881 | -0.30879 | -0.89995 |
| H | -1.54677 | -1.39136 | -0.90434 |
| N | -0.55563 | 0.86997  | -0.17726 |
| S | -0.49275 | 3.30792  | 1.15791  |
| H | 0.01584  | 0.07575  | -0.49175 |
| F | -4.97945 | -2.39943 | -2.27112 |
| F | -4.53859 | -3.06583 | -0.21545 |
| F | -2.92478 | -3.06581 | -1.7334  |
| F | -4.83616 | 3.54397  | -0.13793 |
| F | -6.40114 | 2.13424  | -0.87675 |
| F | -5.84158 | 2.16915  | 1.26254  |
| C | -4.00873 | -2.34756 | -1.30312 |
| C | -5.31777 | 2.27005  | -0.03098 |
| C | 2.19113  | -1.50967 | -1.45341 |
| C | 3.82789  | -1.23462 | -3.04691 |
| C | 4.11689  | -2.47951 | -2.2695  |
| O | 1.1969   | -1.27679 | -0.74662 |
| C | 2.7084   | -0.67944 | -2.57906 |
| O | 5.06437  | -3.26114 | -2.4211  |
| N | 3.03708  | -2.60041 | -1.30681 |
| H | 2.20184  | 0.21318  | -2.90495 |
| H | 4.15726  | 1.58786  | -0.88165 |
| C | 5.1537   | -0.00641 | -0.06999 |
| C | 6.20031  | -0.06126 | -0.91519 |
| C | 6.49822  | 0.96454  | -1.99245 |
| C | 7.20584  | -1.18776 | -0.80914 |
| H | 5.06124  | -0.73845 | 0.72472  |
| H | 7.481    | 1.41684  | -1.80291 |
| H | 6.54847  | 0.4933   | -2.98196 |

|   |          |          |          |
|---|----------|----------|----------|
| H | 5.76175  | 1.77275  | -2.03391 |
| H | 7.1138   | -1.85717 | -1.67543 |
| H | 8.2297   | -0.79333 | -0.79268 |
| H | 7.04471  | -1.78266 | 0.09601  |
| H | 4.46792  | -0.9092  | -3.84868 |
| O | -8.75774 | -1.01476 | 0.66872  |
| H | -8.12943 | -0.68078 | 1.45037  |
| H | -9.13684 | -0.18321 | 0.19355  |
| O | -7.29773 | -1.00876 | -1.2722  |
| H | -7.17896 | -1.77656 | -1.8844  |
| H | -7.91129 | -1.25287 | -0.34714 |
| O | -7.04314 | -0.18818 | 2.35096  |
| H | -6.24763 | -0.84546 | 2.34414  |
| H | -6.69539 | 0.68065  | 2.0243   |
| O | -4.97307 | -1.73539 | 2.19348  |
| H | -4.12201 | -1.26046 | 2.36808  |
| H | -4.86969 | -2.2286  | 1.33629  |
| O | -8.99831 | 0.88706  | -1.09287 |
| H | -8.33835 | 0.18632  | -1.48075 |
| H | -8.39764 | 1.62386  | -0.80066 |
| C | 2.85973  | -3.65845 | -0.34672 |
| C | 1.61939  | -3.813   | 0.29243  |
| C | 3.9003   | -4.55415 | -0.04149 |
| C | 1.43038  | -4.83477 | 1.22123  |
| H | 0.81718  | -3.12659 | 0.07441  |
| C | 3.695    | -5.57221 | 0.88941  |
| H | 4.84475  | -4.4698  | -0.54722 |
| C | 2.46398  | -5.71985 | 1.52883  |
| H | 0.46408  | -4.93684 | 1.70113  |
| H | 4.50862  | -6.25321 | 1.1098   |
| H | 2.31138  | -6.51231 | 2.2513   |

### TS(Diethyl ether) +5H<sub>2</sub>O

Calculation Type = FREQ

Calculation Method = RB3LYP

Basis Set = 6-31G(d,p)

Charge = 0

Spin = Singlet

Solvation = scrf=solvent=diethylether

E(RB3LYP) = -3160.9752 Hartree

RMS Gradient Norm = 1.034e-06 Hartree/Bohr

Temperature = 298.15 Kelvin

Pressure = 1 atm

Frequencies scaled by = 1

Electronic Energy (EE) = -3160.9752 Hartree

Zero-point Energy Correction = 0.758779 Hartree

Thermal Correction to Energy = 0.814619 Hartree

Thermal Correction to Enthalpy = 0.815564 Hartree

Thermal Correction to Free Energy = 0.661501 Hartree

EE + Zero-point Energy = -3160.2164 Hartree

EE + Thermal Energy Correction = -3160.1606 Hartree

EE + Thermal Enthalpy Correction = -3160.1597 Hartree

EE + Thermal Free Energy Correction = -3160.3137 Hartree

E (Thermal) = 511.181 kcal/mol

Heat Capacity (Cv) = 209.223 cal/mol-kelvin

Entropy (S) = 324.253 cal/mol-kelvin

Symbolic Z-matrix:

Charge = 0 Multiplicity = 1

|   |         |          |         |
|---|---------|----------|---------|
| C | 2.55028 | -0.28891 | 2.33655 |
| C | 3.3537  | 0.85963  | 2.375   |
| C | 3.86078 | 1.28859  | 3.61008 |
| C | 3.57033 | 0.59166  | 4.7844  |

|   |          |          |          |
|---|----------|----------|----------|
| C | 2.77585  | -0.55636 | 4.73613  |
| C | 2.27092  | -0.99414 | 3.50945  |
| H | 2.13933  | -0.64465 | 1.40316  |
| H | 4.4917   | 2.17063  | 3.65103  |
| H | 3.97058  | 0.93841  | 5.72999  |
| H | 2.55681  | -1.10644 | 5.6438   |
| H | 1.66397  | -1.89074 | 3.45835  |
| C | 2.98659  | 3.687    | -0.26185 |
| C | 3.80593  | 4.73315  | 0.18728  |
| C | 4.32923  | 5.66128  | -0.71304 |
| C | 4.03994  | 5.55523  | -2.07754 |
| C | 3.21651  | 4.52295  | -2.53035 |
| C | 2.68948  | 3.5947   | -1.62628 |
| H | 4.02591  | 4.82708  | 1.24606  |
| H | 4.95531  | 6.46875  | -0.35171 |
| H | 4.44475  | 6.27676  | -2.77729 |
| H | 2.97445  | 4.4441   | -3.58398 |
| H | 2.0234   | 2.81517  | -1.97622 |
| C | 3.67504  | 1.68807  | 1.13964  |
| C | 2.49562  | 2.64905  | 0.7508   |
| N | 1.43019  | 1.79774  | 0.22627  |
| N | 3.97168  | 0.83766  | -0.06279 |
| H | 2.13431  | 3.15661  | 1.64823  |
| H | 4.53804  | 2.32558  | 1.37288  |
| H | 1.78133  | 0.93405  | -0.17616 |
| C | 0.09598  | 2.00381  | 0.34065  |
| C | -3.02495 | 1.58891  | 0.03257  |
| C | -4.35047 | 1.22066  | -0.19481 |
| C | -4.71018 | -0.00736 | -0.73877 |
| C | -3.66979 | -0.88353 | -1.05136 |
| C | -2.33946 | -0.55209 | -0.84016 |



|   |          |          |          |
|---|----------|----------|----------|
| C | -1.99081 | 0.70006  | -0.29469 |
| H | -2.79054 | 2.55949  | 0.43938  |
| H | -5.75764 | -0.29147 | -0.95229 |
| H | -1.56121 | -1.25592 | -1.10691 |
| N | -0.61815 | 0.9309   | -0.1403  |
| S | -0.55048 | 3.46355  | 1.03687  |
| H | -0.03409 | 0.12704  | -0.43481 |
| F | -4.9717  | -2.18751 | -2.56443 |
| F | -4.5222  | -3.07304 | -0.5978  |
| F | -2.90394 | -2.86913 | -2.09905 |
| F | -4.98908 | 3.46532  | 0.23656  |
| F | -6.52884 | 2.07877  | -0.59597 |
| F | -5.88555 | 1.90697  | 1.51327  |
| C | -4.00218 | -2.22676 | -1.59352 |
| C | -5.41803 | 2.1685   | 0.21977  |
| C | 2.1858   | -1.419   | -1.42362 |
| C | 3.78467  | -1.10504 | -3.05311 |
| C | 4.15531  | -2.30789 | -2.24659 |
| O | 1.16366  | -1.19103 | -0.72016 |
| C | 2.64312  | -0.59724 | -2.58305 |
| O | 5.12053  | -3.03139 | -2.38242 |
| N | 3.11148  | -2.46799 | -1.26117 |
| H | 2.08596  | 0.25733  | -2.92782 |
| H | 4.08882  | 1.43848  | -0.88469 |
| C | 5.00422  | -0.13194 | 0.07415  |
| C | 6.06944  | -0.31609 | -0.73111 |
| C | 6.45282  | 0.59242  | -1.88369 |
| C | 7.0046   | -1.48534 | -0.49232 |
| H | 4.85597  | -0.7911  | 0.92273  |
| H | 7.45149  | 1.01144  | -1.70086 |
| H | 6.50752  | 0.03184  | -2.82563 |

|   |          |          |          |
|---|----------|----------|----------|
| H | 5.7607   | 1.42803  | -2.02286 |
| H | 6.89076  | -2.23232 | -1.29105 |
| H | 8.04968  | -1.15129 | -0.48781 |
| H | 6.79017  | -1.97869 | 0.46145  |
| H | 4.39214  | -0.76822 | -3.87524 |
| O | -8.60079 | -1.35811 | 0.66694  |
| H | -7.93256 | -1.08644 | 1.44112  |
| H | -9.05709 | -0.49699 | 0.33674  |
| O | -7.33014 | -1.0056  | -1.38014 |
| H | -7.18826 | -1.69058 | -2.07955 |
| H | -7.82746 | -1.40613 | -0.45365 |
| O | -6.83622 | -0.65371 | 2.35543  |
| H | -6.03202 | -1.2985  | 2.27793  |
| H | -6.51637 | 0.24904  | 2.09994  |
| O | -4.79226 | -2.20355 | 2.03249  |
| H | -3.9305  | -1.79257 | 2.29579  |
| H | -4.69844 | -2.52421 | 1.09519  |
| O | -9.08873 | 0.74686  | -0.80048 |
| H | -8.44002 | 0.14023  | -1.33647 |
| H | -8.48986 | 1.4607   | -0.45212 |
| C | 3.07084  | -3.52854 | -0.28856 |
| C | 1.88588  | -3.85699 | 0.397    |
| C | 4.23651  | -4.26351 | -0.02364 |
| C | 1.88294  | -4.8926  | 1.33225  |
| H | 0.98743  | -3.29682 | 0.21293  |
| C | 4.21697  | -5.29681 | 0.9117   |
| H | 5.14086  | -4.04366 | -0.56806 |
| C | 3.04542  | -5.61786 | 1.59805  |
| H | 0.96115  | -5.13205 | 1.84951  |
| H | 5.12827  | -5.85204 | 1.09954  |
| H | 3.03724  | -6.4211  | 2.32469  |

## TS(THF) +5H<sub>2</sub>O

Calculation Type = FREQ

Calculation Method = RB3LYP

Basis Set = 6-31G(d,p)

Charge = 0

Spin = Singlet

Solvation = scrf=solvent=thf

E(RB3LYP) = -3160.9817 Hartree

RMS Gradient Norm = 1.18e-06 Hartree/Bohr

Temperature = 298.15 Kelvin

Pressure = 1 atm

Frequencies scaled by = 1

Electronic Energy (EE) = -3160.9817 Hartree

Zero-point Energy Correction = 0.758585 Hartree

Thermal Correction to Energy = 0.814441 Hartree

Thermal Correction to Enthalpy = 0.815385 Hartree

Thermal Correction to Free Energy = 0.661171 Hartree

EE + Zero-point Energy = -3160.2231 Hartree

EE + Thermal Energy Correction = -3160.1672 Hartree

EE + Thermal Enthalpy Correction = -3160.1663 Hartree

EE + Thermal Free Energy Correction = -3160.3205 Hartree

E (Thermal) = 511.069 kcal/mol

Heat Capacity (Cv) = 209.254 cal/mol-kelvin

Entropy (S) = 324.57 cal/mol-kelvin

Symbolic Z-matrix:

Charge = 0 Multiplicity = 1

|   |         |          |         |
|---|---------|----------|---------|
| C | 2.65968 | -0.38054 | 2.27692 |
| C | 3.45798 | 0.77176  | 2.33033 |
| C | 3.99762 | 1.1651   | 3.56394 |
| C | 3.74416 | 0.42899  | 4.72342 |

|   |          |          |          |
|---|----------|----------|----------|
| C | 2.95349  | -0.72143 | 4.66116  |
| C | 2.41637  | -1.12338 | 3.43526  |
| H | 2.22513  | -0.7098  | 1.34355  |
| H | 4.6236   | 2.04998  | 3.61516  |
| H | 4.16981  | 0.74767  | 5.66782  |
| H | 2.76231  | -1.30094 | 5.55678  |
| H | 1.81147  | -2.02075 | 3.37366  |
| C | 2.98046  | 3.69132  | -0.17466 |
| C | 3.75093  | 4.75188  | 0.32534  |
| C | 4.24229  | 5.73714  | -0.532   |
| C | 3.97008  | 5.6737   | -1.90295 |
| C | 3.19777  | 4.62484  | -2.40599 |
| C | 2.70174  | 3.63937  | -1.54554 |
| H | 3.96142  | 4.80939  | 1.38863  |
| H | 4.83221  | 6.55375  | -0.13236 |
| H | 4.35173  | 6.43813  | -2.56942 |
| H | 2.97473  | 4.57361  | -3.46539 |
| H | 2.08259  | 2.84223  | -1.93794 |
| C | 3.73201  | 1.64533  | 1.11373  |
| C | 2.52542  | 2.59558  | 0.79232  |
| N | 1.46643  | 1.74779  | 0.24516  |
| N | 4.00237  | 0.84613  | -0.12773 |
| H | 2.17068  | 3.05031  | 1.72001  |
| H | 4.58869  | 2.29152  | 1.3449   |
| H | 1.82567  | 0.89853  | -0.19841 |
| C | 0.13375  | 1.95224  | 0.35672  |
| C | -2.98873 | 1.61032  | -0.00151 |
| C | -4.32024 | 1.25771  | -0.21865 |
| C | -4.69646 | 0.03091  | -0.7539  |
| C | -3.66907 | -0.86124 | -1.06463 |
| C | -2.33426 | -0.54675 | -0.85742 |

|   |          |          |          |
|---|----------|----------|----------|
| C | -1.96874 | 0.70468  | -0.32234 |
| H | -2.74162 | 2.57877  | 0.40182  |
| H | -5.74667 | -0.23994 | -0.95726 |
| H | -1.56575 | -1.26325 | -1.118   |
| N | -0.59267 | 0.92215  | -0.17921 |
| S | -0.50766 | 3.387    | 1.12622  |
| H | -0.01959 | 0.12804  | -0.51005 |
| F | -5.01143 | -2.16223 | -2.54231 |
| F | -4.52202 | -3.04671 | -0.58486 |
| F | -2.93769 | -2.85501 | -2.12211 |
| F | -4.91533 | 3.51093  | 0.22917  |
| F | -6.47338 | 2.16986  | -0.6419  |
| F | -5.86812 | 1.96064  | 1.47413  |
| C | -4.01877 | -2.20606 | -1.59215 |
| C | -5.37252 | 2.22288  | 0.19298  |
| C | 2.13565  | -1.46794 | -1.46245 |
| C | 3.70458  | -1.26917 | -3.13518 |
| C | 4.05012  | -2.4553  | -2.29137 |
| O | 1.15708  | -1.20644 | -0.7306  |
| C | 2.59266  | -0.70297 | -2.65962 |
| O | 4.99661  | -3.2271  | -2.41461 |
| N | 3.01925  | -2.53511 | -1.28232 |
| H | 2.06005  | 0.15983  | -3.02196 |
| H | 4.08622  | 1.47761  | -0.93081 |
| C | 5.04996  | -0.11252 | -0.06331 |
| C | 6.08466  | -0.24399 | -0.91535 |
| C | 6.40264  | 0.71593  | -2.04627 |
| C | 7.04671  | -1.40556 | -0.76746 |
| H | 4.94096  | -0.8086  | 0.76127  |
| H | 7.40979  | 1.12953  | -1.90131 |
| H | 6.40329  | 0.199    | -3.01383 |

|   |          |          |          |
|---|----------|----------|----------|
| H | 5.70201  | 1.55357  | -2.10932 |
| H | 6.90917  | -2.11693 | -1.59356 |
| H | 8.08584  | -1.05392 | -0.7903  |
| H | 6.87888  | -1.9453  | 0.1708   |
| H | 4.30405  | -0.98213 | -3.98179 |
| O | -8.51131 | -1.2693  | 0.75221  |
| H | -7.8028  | -1.01668 | 1.49815  |
| H | -8.94452 | -0.39389 | 0.43148  |
| O | -7.35081 | -0.95519 | -1.37566 |
| H | -7.1787  | -1.66283 | -2.04474 |
| H | -7.78152 | -1.33976 | -0.42688 |
| O | -6.69062 | -0.61651 | 2.40434  |
| H | -5.89299 | -1.27246 | 2.30412  |
| H | -6.37364 | 0.28023  | 2.12406  |
| O | -4.69868 | -2.22098 | 2.06911  |
| H | -3.82757 | -1.8224  | 2.32266  |
| H | -4.6195  | -2.52648 | 1.12505  |
| O | -9.03614 | 0.83146  | -0.72792 |
| H | -8.43947 | 0.19942  | -1.29369 |
| H | -8.39111 | 1.52375  | -0.42    |
| C | 2.93355  | -3.53836 | -0.25891 |
| C | 1.71444  | -3.78673 | 0.39526  |
| C | 4.06623  | -4.29057 | 0.09475  |
| C | 1.63989  | -4.76283 | 1.38917  |
| H | 0.84225  | -3.20779 | 0.14181  |
| C | 3.97533  | -5.26569 | 1.08806  |
| H | 4.99743  | -4.13083 | -0.42228 |
| C | 2.76682  | -5.50734 | 1.7436   |
| H | 0.6915   | -4.94036 | 1.88247  |
| H | 4.85919  | -5.83677 | 1.34668  |
| H | 2.70323  | -6.26435 | 2.51573  |

### **TS(Carbon tetrachloride) +5H<sub>2</sub>O**

Calculation Type = FREQ

Calculation Method = RB3LYP

Basis Set = 6-31G(d,p)

Charge = 0

Spin = Singlet

Solvation = scrf=solvent=ccl4

E(RB3LYP) = -3160.9648 Hartree

RMS Gradient Norm = 3.97e-07 Hartree/Bohr

Temperature = 298.15 Kelvin

Pressure = 1 atm

Frequencies scaled by = 1

Electronic Energy (EE) = -3160.9648 Hartree

Zero-point Energy Correction = 0.759043 Hartree

Thermal Correction to Energy = 0.814809 Hartree

Thermal Correction to Enthalpy = 0.815753 Hartree

Thermal Correction to Free Energy = 0.66209 Hartree

EE + Zero-point Energy = -3160.2057 Hartree

EE + Thermal Energy Correction = -3160.15 Hartree

EE + Thermal Enthalpy Correction = -3160.149 Hartree

EE + Thermal Free Energy Correction = -3160.3027 Hartree

E (Thermal) = 511.3 kcal/mol

Heat Capacity (Cv) = 209.11 cal/mol-kelvin

Entropy (S) = 323.411 cal/mol-kelvin

Symbolic Z-matrix:

Charge = 0 Multiplicity = 1

|   |         |          |         |
|---|---------|----------|---------|
| C | 2.62899 | -0.40703 | 2.27324 |
| C | 3.39931 | 0.76144  | 2.357   |
| C | 3.9051  | 1.14994  | 3.60581 |
| C | 3.64545 | 0.39404  | 4.74997 |

|   |          |          |          |
|---|----------|----------|----------|
| C | 2.88526  | -0.77381 | 4.65644  |
| C | 2.38259  | -1.17172 | 3.41565  |
| H | 2.21884  | -0.73266 | 1.328    |
| H | 4.51082  | 2.04732  | 3.68116  |
| H | 4.0432   | 0.71061  | 5.70709  |
| H | 2.69091  | -1.36992 | 5.54031  |
| H | 1.80434  | -2.08418 | 3.32892  |
| C | 2.96528  | 3.67871  | -0.16294 |
| C | 3.75152  | 4.72695  | 0.33669  |
| C | 4.27114  | 5.69599  | -0.52136 |
| C | 4.01135  | 5.62959  | -1.89392 |
| C | 3.22002  | 4.59594  | -2.39715 |
| C | 2.69696  | 3.62682  | -1.53516 |
| H | 3.9462   | 4.79127  | 1.40267  |
| H | 4.87039  | 6.50529  | -0.12079 |
| H | 4.4125   | 6.38356  | -2.56077 |
| H | 2.99808  | 4.54942  | -3.45717 |
| H | 2.05211  | 2.84725  | -1.92137 |
| C | 3.6876   | 1.6517   | 1.15751  |
| C | 2.48421  | 2.59228  | 0.80288  |
| N | 1.43896  | 1.74137  | 0.23913  |
| N | 4.01321  | 0.87241  | -0.08566 |
| H | 2.10358  | 3.05602  | 1.71636  |
| H | 4.53086  | 2.30529  | 1.41729  |
| H | 1.79638  | 0.88124  | -0.17904 |
| C | 0.09994  | 1.9449   | 0.35211  |
| C | -3.01069 | 1.5934   | -0.05488 |
| C | -4.34014 | 1.23171  | -0.27018 |
| C | -4.71453 | -0.01644 | -0.75751 |
| C | -3.68377 | -0.91817 | -1.0276  |
| C | -2.3497  | -0.59575 | -0.8211  |



|   |          |          |          |
|---|----------|----------|----------|
| C | -1.9871  | 0.67466  | -0.3306  |
| H | -2.76446 | 2.57741  | 0.31146  |
| H | -5.76641 | -0.30202 | -0.95871 |
| H | -1.57916 | -1.3203  | -1.05323 |
| N | -0.61428 | 0.90031  | -0.18676 |
| S | -0.54896 | 3.36672  | 1.10665  |
| H | -0.03472 | 0.10907  | -0.50515 |
| F | -5.01078 | -2.29108 | -2.45734 |
| F | -4.52918 | -3.08194 | -0.45608 |
| F | -2.93641 | -2.95199 | -1.992   |
| F | -4.94154 | 3.50602  | 0.03698  |
| F | -6.49996 | 2.10587  | -0.73534 |
| F | -5.87925 | 2.03539  | 1.3857   |
| C | -4.02772 | -2.28464 | -1.50149 |
| C | -5.39513 | 2.21844  | 0.08522  |
| C | 2.20269  | -1.42773 | -1.46139 |
| C | 3.84584  | -1.1267  | -3.04567 |
| C | 4.16853  | -2.3485  | -2.24775 |
| O | 1.18026  | -1.21032 | -0.7739  |
| C | 2.70398  | -0.59924 | -2.59588 |
| O | 5.12659  | -3.10486 | -2.37732 |
| N | 3.09323  | -2.489   | -1.28897 |
| H | 2.17251  | 0.27091  | -2.94255 |
| H | 4.10984  | 1.51858  | -0.87526 |
| C | 5.06438  | -0.07443 | -0.00375 |
| C | 6.12416  | -0.18668 | -0.83006 |
| C | 6.47444  | 0.80191  | -1.92658 |
| C | 7.09575  | -1.33612 | -0.6636  |
| H | 4.94287  | -0.77801 | 0.81262  |
| H | 7.45267  | 1.25226  | -1.71027 |
| H | 6.56123  | 0.30075  | -2.89863 |

|   |          |          |          |
|---|----------|----------|----------|
| H | 5.74794  | 1.61419  | -2.02367 |
| H | 6.98559  | -2.04755 | -1.49416 |
| H | 8.13069  | -0.97208 | -0.66025 |
| H | 6.91263  | -1.87996 | 0.26919  |
| H | 4.47961  | -0.79478 | -3.84965 |
| O | -8.5656  | -1.25223 | 0.76528  |
| H | -7.89179 | -0.96177 | 1.525    |
| H | -9.026   | -0.40344 | 0.40779  |
| O | -7.33277 | -1.02204 | -1.3139  |
| H | -7.22638 | -1.74373 | -1.98196 |
| H | -7.82535 | -1.36514 | -0.34815 |
| O | -6.77828 | -0.48288 | 2.40137  |
| H | -5.94884 | -1.09168 | 2.33429  |
| H | -6.4962  | 0.42412  | 2.11888  |
| O | -4.63673 | -1.91021 | 2.06908  |
| H | -3.81641 | -1.35657 | 2.11674  |
| H | -4.62983 | -2.36882 | 1.18601  |
| O | -9.07444 | 0.7693   | -0.79596 |
| H | -8.44231 | 0.13074  | -1.3136  |
| H | -8.46825 | 1.50703  | -0.51736 |
| C | 2.97794  | -3.544   | -0.31794 |
| C | 1.75623  | -3.78488 | 0.33386  |
| C | 4.08471  | -4.35484 | -0.01684 |
| C | 1.6544   | -4.81086 | 1.27279  |
| H | 0.90435  | -3.16294 | 0.1186   |
| C | 3.96613  | -5.37753 | 0.92326  |
| H | 5.0156   | -4.20172 | -0.53589 |
| C | 2.7557   | -5.61235 | 1.57605  |
| H | 0.7033   | -4.98321 | 1.76301  |
| H | 4.83081  | -5.99334 | 1.14073  |
| H | 2.67083  | -6.40829 | 2.3058   |

### TS(Dichloromethane) +5H<sub>2</sub>O

Calculation Type = FREQ

Calculation Method = RB3LYP

Basis Set = 6-31G(d,p)

Charge = 0

Spin = Singlet

Solvation = scrf=solvent=dichloromethane

E(RB3LYP) = -3160.9699 Hartree

RMS Gradient Norm = 1.382e-06 Hartree/Bohr

Temperature = 298.15 Kelvin

Pressure = 1 atm

Frequencies scaled by = 1

Electronic Energy (EE) = -3160.9699 Hartree

Zero-point Energy Correction = 0.758 Hartree

Thermal Correction to Energy = 0.814663 Hartree

Thermal Correction to Enthalpy = 0.815607 Hartree

Thermal Correction to Free Energy = 0.659533 Hartree

EE + Zero-point Energy = -3160.2119 Hartree

EE + Thermal Energy Correction = -3160.1552 Hartree

EE + Thermal Enthalpy Correction = -3160.1543 Hartree

EE + Thermal Free Energy Correction = -3160.3104 Hartree

E (Thermal) = 511.209 kcal/mol

Heat Capacity (Cv) = 211.428 cal/mol-kelvin

Entropy (S) = 328.485 cal/mol-kelvin

Symbolic Z-matrix:

Charge = 0 Multiplicity = 1

|   |          |          |         |
|---|----------|----------|---------|
| C | -3.12235 | 0.21549  | 2.56868 |
| C | -4.02673 | -0.82673 | 2.31271 |
| C | -4.60018 | -1.50913 | 3.39487 |
| C | -4.27491 | -1.1673  | 4.70921 |

|   |          |          |          |
|---|----------|----------|----------|
| C | -3.37397 | -0.12898 | 4.95721  |
| C | -2.8028  | 0.56073  | 3.88409  |
| H | -2.67236 | 0.76188  | 1.75032  |
| H | -5.30744 | -2.31035 | 3.20642  |
| H | -4.7276  | -1.70505 | 5.53406  |
| H | -3.12259 | 0.14308  | 5.97568  |
| H | -2.10593 | 1.36986  | 4.07098  |
| C | -3.77053 | -2.92878 | -0.93502 |
| C | -4.66991 | -3.99435 | -0.78125 |
| C | -5.2214  | -4.62367 | -1.89774 |
| C | -4.8812  | -4.19385 | -3.18485 |
| C | -3.98129 | -3.13863 | -3.34514 |
| C | -3.42556 | -2.51035 | -2.22565 |
| H | -4.93211 | -4.33763 | 0.21454  |
| H | -5.91026 | -5.44985 | -1.76526 |
| H | -5.30858 | -4.6826  | -4.05242 |
| H | -3.70443 | -2.80716 | -4.33929 |
| H | -2.7066  | -1.71061 | -2.35497 |
| C | -4.37044 | -1.28988 | 0.90291  |
| C | -3.24445 | -2.22152 | 0.31593  |
| N | -2.09645 | -1.35794 | 0.04527  |
| N | -4.51826 | -0.16641 | -0.05544 |
| H | -2.96162 | -2.96288 | 1.06669  |
| H | -5.28458 | -1.897   | 0.95582  |
| H | -2.35857 | -0.38301 | -0.14777 |
| C | -0.79194 | -1.71608 | 0.10493  |
| C | 2.3812   | -1.5075  | -0.24879 |
| C | 3.71768  | -1.16206 | -0.45638 |
| C | 4.1499   | 0.14589  | -0.65379 |
| C | 3.17478  | 1.14306  | -0.58795 |
| C | 1.84354  | 0.83809  | -0.37144 |

|   |          |          |          |
|---|----------|----------|----------|
| C | 1.41474  | -0.49477 | -0.22375 |
| H | 2.09231  | -2.53722 | -0.11088 |
| H | 5.2079   | 0.41528  | -0.82924 |
| H | 1.10767  | 1.62582  | -0.31957 |
| N | 0.03343  | -0.63892 | -0.07701 |
| S | -0.27942 | -3.35754 | 0.39772  |
| H | -0.45475 | 0.26686  | -0.12749 |
| F | 4.24934  | 2.85176  | -1.86085 |
| F | 4.41647  | 2.962    | 0.33312  |
| F | 2.47503  | 3.41596  | -0.65008 |
| F | 4.22439  | -3.48673 | -0.41781 |
| F | 5.68166  | -2.10926 | -1.40802 |
| F | 5.50906  | -2.13704 | 0.78522  |
| C | 3.56842  | 2.57205  | -0.71524 |
| C | 4.74367  | -2.22844 | -0.38107 |
| C | -2.69432 | 3.05603  | -0.80583 |
| C | -3.57889 | 4.74432  | -2.10961 |
| C | -3.70529 | 5.11578  | -0.64742 |
| O | -2.14563 | 1.98901  | -0.47246 |
| C | -2.99208 | 3.54684  | -2.20216 |
| O | -4.18438 | 6.1251   | -0.13874 |
| N | -3.14029 | 4.02955  | 0.05704  |
| H | -2.74076 | 2.97699  | -3.08289 |
| H | -4.60743 | -0.50018 | -1.01726 |
| C | -5.29007 | 0.96571  | 0.26363  |
| C | -5.86311 | 1.82904  | -0.60342 |
| C | -5.8576  | 1.65587  | -2.11183 |
| C | -6.57166 | 3.07796  | -0.10665 |
| H | -5.35158 | 1.15968  | 1.32926  |
| H | -6.88742 | 1.65656  | -2.49266 |
| H | -5.33435 | 2.4926   | -2.5953  |

|   |          |          |          |
|---|----------|----------|----------|
| H | -5.37995 | 0.72699  | -2.43839 |
| H | -6.07319 | 3.97834  | -0.49305 |
| H | -7.61151 | 3.09694  | -0.45989 |
| H | -6.57817 | 3.12617  | 0.98768  |
| H | -3.92609 | 5.389    | -2.89947 |
| O | 8.72487  | 0.10311  | 0.29816  |
| H | 8.09545  | 0.21061  | 1.08855  |
| H | 8.66536  | -0.87553 | 0.00876  |
| O | 6.74511  | 1.39203  | -0.74666 |
| H | 6.46086  | 1.44625  | 0.21388  |
| H | 7.63602  | 0.8738   | -0.59196 |
| O | 6.56881  | 0.4029   | 1.81589  |
| H | 5.9401   | 0.98249  | 2.39804  |
| H | 6.08277  | -0.41947 | 1.55287  |
| O | 4.8144   | 1.92497  | 2.91552  |
| H | 4.03247  | 1.4398   | 3.28656  |
| H | 4.51147  | 2.36795  | 2.07597  |
| O | 8.38874  | -2.37376 | -0.59497 |
| H | 8.93516  | -2.47994 | -1.4176  |
| H | 7.44151  | -2.33431 | -0.89787 |
| C | -3.05997 | 3.93904  | 1.52205  |
| C | -1.93905 | 4.4316   | 2.19092  |
| C | -4.10438 | 3.36085  | 2.24347  |
| C | -1.86234 | 4.34534  | 3.58085  |
| H | -1.11548 | 4.88668  | 1.62182  |
| C | -4.02824 | 3.27537  | 3.63391  |
| H | -4.98799 | 2.97274  | 1.71647  |
| C | -2.90741 | 3.76736  | 4.30265  |
| H | -0.97857 | 4.73299  | 4.10808  |
| H | -4.85205 | 2.81981  | 4.20249  |
| H | -2.84673 | 3.69951  | 5.39855  |

## TS(DMSO) +5H<sub>2</sub>O

Calculation Type = FREQ

Calculation Method = RB3LYP

Basis Set = 6-31G(d,p)

Charge = 0

Spin = Singlet

Solvation = scrf=solvent=dmsol

E(RB3LYP) = -3160.991 Hartree

RMS Gradient Norm = 8.9e-07 Hartree/Bohr

Temperature = 298.15 Kelvin

Pressure = 1 atm

Frequencies scaled by = 1

Electronic Energy (EE) = -3160.991 Hartree

Zero-point Energy Correction = 0.757961 Hartree

Thermal Correction to Energy = 0.814018 Hartree

Thermal Correction to Enthalpy = 0.814962 Hartree

Thermal Correction to Free Energy = 0.659777 Hartree

EE + Zero-point Energy = -3160.233 Hartree

EE + Thermal Energy Correction = -3160.177 Hartree

EE + Thermal Enthalpy Correction = -3160.176 Hartree

EE + Thermal Free Energy Correction = -3160.3312 Hartree

E (Thermal) = 510.804 kcal/mol

Heat Capacity (Cv) = 209.505 cal/mol-kelvin

Entropy (S) = 326.615 cal/mol-kelvin

Symbolic Z-matrix:

Charge = 0 Multiplicity = 1

|   |         |          |         |
|---|---------|----------|---------|
| C | 2.67135 | -0.37866 | 2.27695 |
| C | 3.46932 | 0.7741   | 2.32576 |
| C | 4.01466 | 1.16863  | 3.55649 |
| C | 3.76706 | 0.43327  | 4.71773 |

|   |          |          |          |
|---|----------|----------|----------|
| C | 2.97651  | -0.7175  | 4.66011  |
| C | 2.43377  | -1.12065 | 3.43705  |
| H | 2.23258  | -0.70878 | 1.34585  |
| H | 4.64036  | 2.05392  | 3.60405  |
| H | 4.19706  | 0.75284  | 5.65986  |
| H | 2.78972  | -1.29634 | 5.5571   |
| H | 1.82883  | -2.01824 | 3.37907  |
| C | 2.97449  | 3.69365  | -0.1753  |
| C | 3.74276  | 4.75669  | 0.32285  |
| C | 4.2279   | 5.74414  | -0.53556 |
| C | 3.95165  | 5.68036  | -1.90569 |
| C | 3.18164  | 4.62889  | -2.40687 |
| C | 2.69178  | 3.64124  | -1.54537 |
| H | 3.95655  | 4.81432  | 1.38548  |
| H | 4.81623  | 6.56261  | -0.13737 |
| H | 4.32855  | 6.44642  | -2.57299 |
| H | 2.95575  | 4.57715  | -3.46564 |
| H | 2.07471  | 2.84178  | -1.93635 |
| C | 3.73623  | 1.64744  | 1.10737  |
| C | 2.52633  | 2.59581  | 0.79248  |
| N | 1.4668   | 1.74626  | 0.24902  |
| N | 4.00052  | 0.84791  | -0.13505 |
| H | 2.175    | 3.04869  | 1.72237  |
| H | 4.59319  | 2.29492  | 1.33384  |
| H | 1.82661  | 0.89845  | -0.1971  |
| C | 0.1343   | 1.94905  | 0.36347  |
| C | -2.98853 | 1.60667  | 0.00794  |
| C | -4.32    | 1.25505  | -0.21106 |
| C | -4.69608 | 0.02994  | -0.75014 |
| C | -3.66877 | -0.86186 | -1.06217 |
| C | -2.33406 | -0.54838 | -0.85315 |



|   |          |          |          |
|---|----------|----------|----------|
| C | -1.9686  | 0.70173  | -0.31487 |
| H | -2.74146 | 2.57398  | 0.41398  |
| H | -5.74605 | -0.23965 | -0.95571 |
| H | -1.5656  | -1.26448 | -1.1149  |
| N | -0.59247 | 0.91882  | -0.17129 |
| S | -0.50681 | 3.38302  | 1.13564  |
| H | -0.01959 | 0.12482  | -0.50294 |
| F | -5.00827 | -2.15597 | -2.54829 |
| F | -4.52801 | -3.04714 | -0.59188 |
| F | -2.93742 | -2.85412 | -2.12264 |
| F | -4.91467 | 3.50705  | 0.24338  |
| F | -6.47205 | 2.16957  | -0.63435 |
| F | -5.86997 | 1.95321  | 1.4819   |
| C | -4.019   | -2.20462 | -1.59457 |
| C | -5.37239 | 2.21924  | 0.20241  |
| C | 2.12938  | -1.47314 | -1.46164 |
| C | 3.68678  | -1.28127 | -3.14594 |
| C | 4.03995  | -2.4621  | -2.29754 |
| O | 1.15576  | -1.20941 | -0.72426 |
| C | 2.57707  | -0.71421 | -2.66633 |
| O | 4.98727  | -3.23265 | -2.42184 |
| N | 3.01587  | -2.53797 | -1.28168 |
| H | 2.04071  | 0.14573  | -3.02994 |
| H | 4.07897  | 1.4788   | -0.93913 |
| C | 5.05025  | -0.10902 | -0.07585 |
| C | 6.07951  | -0.24033 | -0.93432 |
| C | 6.38763  | 0.71708  | -2.07009 |
| C | 7.04461  | -1.39999 | -0.79066 |
| H | 4.94762  | -0.8039  | 0.75057  |
| H | 7.39575  | 1.13154  | -1.93466 |
| H | 6.38027  | 0.19773  | -3.03634 |

|   |          |          |          |
|---|----------|----------|----------|
| H | 5.68601  | 1.55416  | -2.12947 |
| H | 6.90336  | -2.11292 | -1.61476 |
| H | 8.08295  | -1.04647 | -0.8205  |
| H | 6.88369  | -1.93856 | 0.14951  |
| H | 4.28026  | -0.99785 | -3.99799 |
| O | -8.51281 | -1.27177 | 0.74587  |
| H | -7.80544 | -1.02146 | 1.49376  |
| H | -8.94449 | -0.39523 | 0.42631  |
| O | -7.35031 | -0.95341 | -1.38066 |
| H | -7.17521 | -1.65984 | -2.05025 |
| H | -7.78111 | -1.33993 | -0.43331 |
| O | -6.69571 | -0.62582 | 2.40492  |
| H | -5.89954 | -1.28355 | 2.303    |
| H | -6.37642 | 0.27084  | 2.12687  |
| O | -4.70941 | -2.23597 | 2.06596  |
| H | -3.83725 | -1.84163 | 2.32265  |
| H | -4.62983 | -2.53607 | 1.12017  |
| O | -9.03486 | 0.83282  | -0.73073 |
| H | -8.43811 | 0.20148  | -1.2972  |
| H | -8.38917 | 1.52305  | -0.41958 |
| C | 2.93847  | -3.53535 | -0.25209 |
| C | 1.72243  | -3.78625 | 0.40675  |
| C | 4.07623  | -4.27906 | 0.10315  |
| C | 1.65585  | -4.75644 | 1.40702  |
| H | 0.84636  | -3.21365 | 0.15208  |
| C | 3.99336  | -5.24841 | 1.10282  |
| H | 5.00522  | -4.11738 | -0.41731 |
| C | 2.78787  | -5.49249 | 1.76308  |
| H | 0.70977  | -4.93605 | 1.90397  |
| H | 4.881    | -5.81299 | 1.36273  |
| H | 2.73048  | -6.24494 | 2.54015  |

## TS(EtOH) +5H<sub>2</sub>O

Calculation Type = FREQ

Calculation Method = RB3LYP

Basis Set = 6-31G(d,p)

Charge = 0

Spin = Singlet

Solvation = scrf=solvent=ethanol

E(RB3LYP) = -3160.9892 Hartree

RMS Gradient Norm = 9.13e-07 Hartree/Bohr

Temperature = 298.15 Kelvin

Pressure = 1 atm

Frequencies scaled by = 1

Electronic Energy (EE) = -3160.9892 Hartree

Zero-point Energy Correction = 0.758137 Hartree

Thermal Correction to Energy = 0.814152 Hartree

Thermal Correction to Enthalpy = 0.815096 Hartree

Thermal Correction to Free Energy = 0.660088 Hartree

EE + Zero-point Energy = -3160.2311 Hartree

EE + Thermal Energy Correction = -3160.175 Hartree

EE + Thermal Enthalpy Correction = -3160.1741 Hartree

EE + Thermal Free Energy Correction = -3160.3291 Hartree

E (Thermal) = 510.888 kcal/mol

Heat Capacity (Cv) = 209.442 cal/mol-kelvin

Entropy (S) = 326.241 cal/mol-kelvin

Symbolic Z-matrix:

Charge = 0 Multiplicity = 1

|   |         |          |         |
|---|---------|----------|---------|
| C | 2.65968 | -0.38054 | 2.27692 |
| C | 3.45798 | 0.77176  | 2.33033 |
| C | 3.99762 | 1.1651   | 3.56394 |
| C | 3.74416 | 0.42899  | 4.72342 |

|   |          |          |          |
|---|----------|----------|----------|
| C | 2.95349  | -0.72143 | 4.66116  |
| C | 2.41637  | -1.12338 | 3.43526  |
| H | 2.22513  | -0.7098  | 1.34355  |
| H | 4.6236   | 2.04998  | 3.61516  |
| H | 4.16981  | 0.74767  | 5.66782  |
| H | 2.76231  | -1.30094 | 5.55678  |
| H | 1.81147  | -2.02075 | 3.37366  |
| C | 2.98046  | 3.69132  | -0.17466 |
| C | 3.75093  | 4.75188  | 0.32534  |
| C | 4.24229  | 5.73714  | -0.532   |
| C | 3.97008  | 5.6737   | -1.90295 |
| C | 3.19777  | 4.62484  | -2.40599 |
| C | 2.70174  | 3.63937  | -1.54554 |
| H | 3.96142  | 4.80939  | 1.38863  |
| H | 4.83221  | 6.55375  | -0.13236 |
| H | 4.35173  | 6.43813  | -2.56942 |
| H | 2.97473  | 4.57361  | -3.46539 |
| H | 2.08259  | 2.84223  | -1.93794 |
| C | 3.73201  | 1.64533  | 1.11373  |
| C | 2.52542  | 2.59558  | 0.79232  |
| N | 1.46643  | 1.74779  | 0.24516  |
| N | 4.00237  | 0.84613  | -0.12773 |
| H | 2.17068  | 3.05031  | 1.72001  |
| H | 4.58869  | 2.29152  | 1.3449   |
| H | 1.82567  | 0.89853  | -0.19841 |
| C | 0.13375  | 1.95224  | 0.35672  |
| C | -2.98873 | 1.61032  | -0.00151 |
| C | -4.32024 | 1.25771  | -0.21865 |
| C | -4.69646 | 0.03091  | -0.7539  |
| C | -3.66907 | -0.86124 | -1.06463 |
| C | -2.33426 | -0.54675 | -0.85742 |

|   |          |          |          |
|---|----------|----------|----------|
| C | -1.96874 | 0.70468  | -0.32234 |
| H | -2.74162 | 2.57877  | 0.40182  |
| H | -5.74667 | -0.23994 | -0.95726 |
| H | -1.56575 | -1.26325 | -1.118   |
| N | -0.59267 | 0.92215  | -0.17921 |
| S | -0.50766 | 3.387    | 1.12622  |
| H | -0.01959 | 0.12804  | -0.51005 |
| F | -5.01143 | -2.16223 | -2.54231 |
| F | -4.52202 | -3.04671 | -0.58486 |
| F | -2.93769 | -2.85501 | -2.12211 |
| F | -4.91533 | 3.51093  | 0.22917  |
| F | -6.47338 | 2.16986  | -0.6419  |
| F | -5.86812 | 1.96064  | 1.47413  |
| C | -4.01877 | -2.20606 | -1.59215 |
| C | -5.37252 | 2.22288  | 0.19298  |
| C | 2.13565  | -1.46794 | -1.46245 |
| C | 3.70458  | -1.26917 | -3.13518 |
| C | 4.05012  | -2.4553  | -2.29137 |
| O | 1.15708  | -1.20644 | -0.7306  |
| C | 2.59266  | -0.70297 | -2.65962 |
| O | 4.99661  | -3.2271  | -2.41461 |
| N | 3.01925  | -2.53511 | -1.28232 |
| H | 2.06005  | 0.15983  | -3.02196 |
| H | 4.08622  | 1.47761  | -0.93081 |
| C | 5.04996  | -0.11252 | -0.06331 |
| C | 6.08466  | -0.24399 | -0.91535 |
| C | 6.40264  | 0.71593  | -2.04627 |
| C | 7.04671  | -1.40556 | -0.76746 |
| H | 4.94096  | -0.8086  | 0.76127  |
| H | 7.40979  | 1.12953  | -1.90131 |
| H | 6.40329  | 0.199    | -3.01383 |

|   |          |          |          |
|---|----------|----------|----------|
| H | 5.70201  | 1.55357  | -2.10932 |
| H | 6.90917  | -2.11693 | -1.59356 |
| H | 8.08584  | -1.05392 | -0.7903  |
| H | 6.87888  | -1.9453  | 0.1708   |
| H | 4.30405  | -0.98213 | -3.98179 |
| O | -8.51131 | -1.2693  | 0.75221  |
| H | -7.8028  | -1.01668 | 1.49815  |
| H | -8.94452 | -0.39389 | 0.43148  |
| O | -7.35081 | -0.95519 | -1.37566 |
| H | -7.1787  | -1.66283 | -2.04474 |
| H | -7.78152 | -1.33976 | -0.42688 |
| O | -6.69062 | -0.61651 | 2.40434  |
| H | -5.89299 | -1.27246 | 2.30412  |
| H | -6.37364 | 0.28023  | 2.12406  |
| O | -4.69868 | -2.22098 | 2.06911  |
| H | -3.82757 | -1.8224  | 2.32266  |
| H | -4.6195  | -2.52648 | 1.12505  |
| O | -9.03614 | 0.83146  | -0.72792 |
| H | -8.43947 | 0.19942  | -1.29369 |
| H | -8.39111 | 1.52375  | -0.42    |
| C | 2.93355  | -3.53836 | -0.25891 |
| C | 1.71444  | -3.78673 | 0.39526  |
| C | 4.06623  | -4.29057 | 0.09475  |
| C | 1.63989  | -4.76283 | 1.38917  |
| H | 0.84225  | -3.20779 | 0.14181  |
| C | 3.97533  | -5.26569 | 1.08806  |
| H | 4.99743  | -4.13083 | -0.42228 |
| C | 2.76682  | -5.50734 | 1.7436   |
| H | 0.6915   | -4.94036 | 1.88247  |
| H | 4.85919  | -5.83677 | 1.34668  |
| H | 2.70323  | -6.26435 | 2.5157   |

### TS(Formic acid) +5H<sub>2</sub>O

Calculation Type = FREQ

Calculation Method = RB3LYP

Basis Set = 6-31G(d,p)

Charge = 0

Spin = Singlet

Solvation = scrf=solvent=formicacid

E(RB3LYP) = -3160.9911 Hartree

RMS Gradient Norm = 8.77e-07 Hartree/Bohr

Temperature = 298.15 Kelvin

Pressure = 1 atm

Frequencies scaled by = 1

Electronic Energy (EE) = -3160.9911 Hartree

Zero-point Energy Correction = 0.757932 Hartree

Thermal Correction to Energy = 0.813998 Hartree

Thermal Correction to Enthalpy = 0.814942 Hartree

Thermal Correction to Free Energy = 0.659706 Hartree

EE + Zero-point Energy = -3160.2332 Hartree

EE + Thermal Energy Correction = -3160.1772 Hartree

EE + Thermal Enthalpy Correction = -3160.1762 Hartree

EE + Thermal Free Energy Correction = -3160.3314 Hartree

E (Thermal) = 510.791 kcal/mol

Heat Capacity (Cv) = 209.516 cal/mol-kelvin

Entropy (S) = 326.722 cal/mol-kelvin

Symbolic Z-matrix:

Charge = 0 Multiplicity = 1

|   |         |          |         |
|---|---------|----------|---------|
| C | 2.67135 | -0.37866 | 2.27695 |
| C | 3.46932 | 0.7741   | 2.32576 |
| C | 4.01466 | 1.16863  | 3.55649 |
| C | 3.76706 | 0.43327  | 4.71773 |

|   |          |          |          |
|---|----------|----------|----------|
| C | 2.97651  | -0.7175  | 4.66011  |
| C | 2.43377  | -1.12065 | 3.43705  |
| H | 2.23258  | -0.70878 | 1.34585  |
| H | 4.64036  | 2.05392  | 3.60405  |
| H | 4.19706  | 0.75284  | 5.65986  |
| H | 2.78972  | -1.29634 | 5.5571   |
| H | 1.82883  | -2.01824 | 3.37907  |
| C | 2.97449  | 3.69365  | -0.1753  |
| C | 3.74276  | 4.75669  | 0.32285  |
| C | 4.2279   | 5.74414  | -0.53556 |
| C | 3.95165  | 5.68036  | -1.90569 |
| C | 3.18164  | 4.62889  | -2.40687 |
| C | 2.69178  | 3.64124  | -1.54537 |
| H | 3.95655  | 4.81432  | 1.38548  |
| H | 4.81623  | 6.56261  | -0.13737 |
| H | 4.32855  | 6.44642  | -2.57299 |
| H | 2.95575  | 4.57715  | -3.46564 |
| H | 2.07471  | 2.84178  | -1.93635 |
| C | 3.73623  | 1.64744  | 1.10737  |
| C | 2.52633  | 2.59581  | 0.79248  |
| N | 1.4668   | 1.74626  | 0.24902  |
| N | 4.00052  | 0.84791  | -0.13505 |
| H | 2.175    | 3.04869  | 1.72237  |
| H | 4.59319  | 2.29492  | 1.33384  |
| H | 1.82661  | 0.89845  | -0.1971  |
| C | 0.1343   | 1.94905  | 0.36347  |
| C | -2.98853 | 1.60667  | 0.00794  |
| C | -4.32    | 1.25505  | -0.21106 |
| C | -4.69608 | 0.02994  | -0.75014 |
| C | -3.66877 | -0.86186 | -1.06217 |
| C | -2.33406 | -0.54838 | -0.85315 |



|   |          |          |          |
|---|----------|----------|----------|
| C | -1.9686  | 0.70173  | -0.31487 |
| H | -2.74146 | 2.57398  | 0.41398  |
| H | -5.74605 | -0.23965 | -0.95571 |
| H | -1.5656  | -1.26448 | -1.1149  |
| N | -0.59247 | 0.91882  | -0.17129 |
| S | -0.50681 | 3.38302  | 1.13564  |
| H | -0.01959 | 0.12482  | -0.50294 |
| F | -5.00827 | -2.15597 | -2.54829 |
| F | -4.52801 | -3.04714 | -0.59188 |
| F | -2.93742 | -2.85412 | -2.12264 |
| F | -4.91467 | 3.50705  | 0.24338  |
| F | -6.47205 | 2.16957  | -0.63435 |
| F | -5.86997 | 1.95321  | 1.4819   |
| C | -4.019   | -2.20462 | -1.59457 |
| C | -5.37239 | 2.21924  | 0.20241  |
| C | 2.12938  | -1.47314 | -1.46164 |
| C | 3.68678  | -1.28127 | -3.14594 |
| C | 4.03995  | -2.4621  | -2.29754 |
| O | 1.15576  | -1.20941 | -0.72426 |
| C | 2.57707  | -0.71421 | -2.66633 |
| O | 4.98727  | -3.23265 | -2.42184 |
| N | 3.01587  | -2.53797 | -1.28168 |
| H | 2.04071  | 0.14573  | -3.02994 |
| H | 4.07897  | 1.4788   | -0.93913 |
| C | 5.05025  | -0.10902 | -0.07585 |
| C | 6.07951  | -0.24033 | -0.93432 |
| C | 6.38763  | 0.71708  | -2.07009 |
| C | 7.04461  | -1.39999 | -0.79066 |
| H | 4.94762  | -0.8039  | 0.75057  |
| H | 7.39575  | 1.13154  | -1.93466 |
| H | 6.38027  | 0.19773  | -3.03634 |

|   |          |          |          |
|---|----------|----------|----------|
| H | 5.68601  | 1.55416  | -2.12947 |
| H | 6.90336  | -2.11292 | -1.61476 |
| H | 8.08295  | -1.04647 | -0.8205  |
| H | 6.88369  | -1.93856 | 0.14951  |
| H | 4.28026  | -0.99785 | -3.99799 |
| O | -8.51281 | -1.27177 | 0.74587  |
| H | -7.80544 | -1.02146 | 1.49376  |
| H | -8.94449 | -0.39523 | 0.42631  |
| O | -7.35031 | -0.95341 | -1.38066 |
| H | -7.17521 | -1.65984 | -2.05025 |
| H | -7.78111 | -1.33993 | -0.43331 |
| O | -6.69571 | -0.62582 | 2.40492  |
| H | -5.89954 | -1.28355 | 2.303    |
| H | -6.37642 | 0.27084  | 2.12687  |
| O | -4.70941 | -2.23597 | 2.06596  |
| H | -3.83725 | -1.84163 | 2.32265  |
| H | -4.62983 | -2.53607 | 1.12017  |
| O | -9.03486 | 0.83282  | -0.73073 |
| H | -8.43811 | 0.20148  | -1.2972  |
| H | -8.38917 | 1.52305  | -0.41958 |
| C | 2.93847  | -3.53535 | -0.25209 |
| C | 1.72243  | -3.78625 | 0.40675  |
| C | 4.07623  | -4.27906 | 0.10315  |
| C | 1.65585  | -4.75644 | 1.40702  |
| H | 0.84636  | -3.21365 | 0.15208  |
| C | 3.99336  | -5.24841 | 1.10282  |
| H | 5.00522  | -4.11738 | -0.41731 |
| C | 2.78787  | -5.49249 | 1.76308  |
| H | 0.70977  | -4.93605 | 1.90397  |
| H | 4.881    | -5.81299 | 1.36273  |
| H | 2.73048  | -6.24494 | 2.54015  |

## TS(Water) +5H<sub>2</sub>O

Calculation Type = FREQ

Calculation Method = RB3LYP

Basis Set = 6-31G(d,p)

Charge = 0

Spin = Singlet

Solvation = scrf=solvent=water

E(RB3LYP) = -3160.9918 Hartree

RMS Gradient Norm = 8.18e-07 Hartree/Bohr

Temperature = 298.15 Kelvin

Pressure = 1 atm

Frequencies scaled by = 1

Electronic Energy (EE) = -3160.9918 Hartree

Zero-point Energy Correction = 0.757812 Hartree

Thermal Correction to Energy = 0.813916 Hartree

Thermal Correction to Enthalpy = 0.81486 Hartree

Thermal Correction to Free Energy = 0.659441 Hartree

EE + Zero-point Energy = -3160.234 Hartree

EE + Thermal Energy Correction = -3160.1779 Hartree

EE + Thermal Enthalpy Correction = -3160.177 Hartree

EE + Thermal Free Energy Correction = -3160.3324 Hartree

E (Thermal) = 510.74 kcal/mol

Heat Capacity (Cv) = 209.564 cal/mol-kelvin

Entropy (S) = 327.108 cal/mol-kelvin

Symbolic Z-matrix:

Charge = 0 Multiplicity = 1

|   |         |          |         |
|---|---------|----------|---------|
| C | 2.67135 | -0.37866 | 2.27695 |
| C | 3.46932 | 0.7741   | 2.32576 |
| C | 4.01466 | 1.16863  | 3.55649 |
| C | 3.76706 | 0.43327  | 4.71773 |

|   |          |          |          |
|---|----------|----------|----------|
| C | 2.97651  | -0.71749 | 4.66011  |
| C | 2.43376  | -1.12065 | 3.43705  |
| H | 2.23258  | -0.70878 | 1.34584  |
| H | 4.64036  | 2.05392  | 3.60405  |
| H | 4.19706  | 0.75284  | 5.65985  |
| H | 2.78972  | -1.29634 | 5.5571   |
| H | 1.82883  | -2.01824 | 3.37907  |
| C | 2.97449  | 3.69365  | -0.1753  |
| C | 3.74277  | 4.75668  | 0.32284  |
| C | 4.22791  | 5.74413  | -0.53557 |
| C | 3.95166  | 5.68035  | -1.9057  |
| C | 3.18164  | 4.62889  | -2.40687 |
| C | 2.69178  | 3.64124  | -1.54538 |
| H | 3.95657  | 4.81431  | 1.38547  |
| H | 4.81625  | 6.5626   | -0.13738 |
| H | 4.32856  | 6.44641  | -2.573   |
| H | 2.95575  | 4.57715  | -3.46564 |
| H | 2.07471  | 2.84179  | -1.93635 |
| C | 3.73623  | 1.64744  | 1.10737  |
| C | 2.52633  | 2.59581  | 0.79248  |
| N | 1.4668   | 1.74626  | 0.24901  |
| N | 4.00052  | 0.84791  | -0.13506 |
| H | 2.175    | 3.04869  | 1.72236  |
| H | 4.59319  | 2.29492  | 1.33384  |
| H | 1.82661  | 0.89845  | -0.19711 |
| C | 0.1343   | 1.94905  | 0.36347  |
| C | -2.98852 | 1.60667  | 0.00795  |
| C | -4.32    | 1.25505  | -0.21104 |
| C | -4.69608 | 0.02995  | -0.75013 |
| C | -3.66877 | -0.86185 | -1.06217 |
| C | -2.33406 | -0.54837 | -0.85315 |

|   |          |          |          |
|---|----------|----------|----------|
| C | -1.9686  | 0.70173  | -0.31486 |
| H | -2.74146 | 2.57397  | 0.414    |
| H | -5.74605 | -0.23964 | -0.95571 |
| H | -1.5656  | -1.26447 | -1.11491 |
| N | -0.59247 | 0.91882  | -0.17128 |
| S | -0.50681 | 3.38302  | 1.13564  |
| H | -0.01959 | 0.12482  | -0.50294 |
| F | -5.00827 | -2.15595 | -2.5483  |
| F | -4.52801 | -3.04714 | -0.5919  |
| F | -2.93743 | -2.85411 | -2.12265 |
| F | -4.91467 | 3.50705  | 0.24341  |
| F | -6.47204 | 2.16958  | -0.63433 |
| F | -5.86997 | 1.9532   | 1.48192  |
| C | -4.019   | -2.20461 | -1.59459 |
| C | -5.37239 | 2.21924  | 0.20243  |
| C | 2.12938  | -1.47314 | -1.46164 |
| C | 3.68678  | -1.28128 | -3.14593 |
| C | 4.03995  | -2.4621  | -2.29753 |
| O | 1.15575  | -1.20941 | -0.72425 |
| C | 2.57708  | -0.71421 | -2.66633 |
| O | 4.98727  | -3.23266 | -2.42183 |
| N | 3.01586  | -2.53797 | -1.28167 |
| H | 2.04071  | 0.14572  | -3.02994 |
| H | 4.07898  | 1.47879  | -0.93913 |
| C | 5.05025  | -0.10902 | -0.07585 |
| C | 6.07951  | -0.24033 | -0.93432 |
| C | 6.38763  | 0.71708  | -2.07009 |
| C | 7.04461  | -1.4     | -0.79066 |
| H | 4.94762  | -0.80391 | 0.75057  |
| H | 7.39575  | 1.13153  | -1.93467 |
| H | 6.38028  | 0.19772  | -3.03634 |

|   |          |          |          |
|---|----------|----------|----------|
| H | 5.68601  | 1.55415  | -2.12948 |
| H | 6.90336  | -2.11293 | -1.61476 |
| H | 8.08295  | -1.04648 | -0.8205  |
| H | 6.88369  | -1.93856 | 0.14951  |
| H | 4.28026  | -0.99785 | -3.99798 |
| O | -8.51282 | -1.27177 | 0.74586  |
| H | -7.80545 | -1.02147 | 1.49375  |
| H | -8.9445  | -0.39523 | 0.4263   |
| O | -7.35031 | -0.95339 | -1.38066 |
| H | -7.17521 | -1.65982 | -2.05026 |
| H | -7.78112 | -1.33992 | -0.43332 |
| O | -6.69572 | -0.62583 | 2.40492  |
| H | -5.89955 | -1.28357 | 2.30299  |
| H | -6.37643 | 0.27083  | 2.12687  |
| O | -4.70943 | -2.23599 | 2.06595  |
| H | -3.83727 | -1.84166 | 2.32264  |
| H | -4.62985 | -2.53607 | 1.12016  |
| O | -9.03486 | 0.83283  | -0.73073 |
| H | -8.4381  | 0.2015   | -1.2972  |
| H | -8.38917 | 1.52306  | -0.41957 |
| C | 2.93846  | -3.53536 | -0.25208 |
| C | 1.72242  | -3.78625 | 0.40676  |
| C | 4.07623  | -4.27906 | 0.10316  |
| C | 1.65584  | -4.75644 | 1.40703  |
| H | 0.84636  | -3.21365 | 0.15208  |
| C | 3.99335  | -5.24841 | 1.10283  |
| H | 5.00522  | -4.11738 | -0.41731 |
| C | 2.78786  | -5.49248 | 1.76309  |
| H | 0.70976  | -4.93605 | 1.90397  |
| H | 4.88099  | -5.81299 | 1.36274  |
| H | 2.73047  | -6.24493 | 2.54016  |

**Figure 7.****Isobutyraldehyde(1)**

Calculation Type = FREQ

Calculation Method = RB3LYP

Basis Set = 6-31G(d,p)

Charge = 0

Spin = Singlet

Solvation = scrf=solvent=water

E(RB3LYP) = -231.19058 Hartree

RMS Gradient Norm = 1.3092e-05 Hartree/Bohr

Temperature = 298.15 Kelvin

Pressure = 1 atm

Frequencies scaled by = 1

Electronic Energy (EE) = -231.19058 Hartree

Zero-point Energy Correction = 0.113758 Hartree

Thermal Correction to Energy = 0.119987 Hartree

Thermal Correction to Enthalpy = 0.120931 Hartree

Thermal Correction to Free Energy = 0.084489 Hartree

EE + Zero-point Energy = -231.07683 Hartree

EE + Thermal Energy Correction = -231.0706 Hartree

EE + Thermal Enthalpy Correction = -231.06965 Hartree

EE + Thermal Free Energy Correction = -231.10609 Hartree

E (Thermal) = 75.293 kcal/mol

Heat Capacity (Cv) = 21.001 cal/mol-kelvin

Entropy (S) = 76.699 cal/mol-kelvin

Symbolic Z-matrix:

Charge = 0 Multiplicity = 1

|   |          |          |          |
|---|----------|----------|----------|
| O | -1.8992  | -0.10315 | -0.26595 |
| H | -0.91113 | -1.73269 | 0.47759  |
| C | 0.43632  | 0.01567  | 0.43676  |

|   |          |          |          |
|---|----------|----------|----------|
| C | 1.54479  | -0.81135 | -0.26368 |
| H | 0.61992  | -0.02198 | 1.52255  |
| H | 1.40682  | -0.78259 | -1.35008 |
| H | 2.52952  | -0.39606 | -0.02739 |
| H | 1.5247   | -1.85767 | 0.06339  |
| C | -0.90422 | -0.65864 | 0.19693  |
| C | 0.40064  | 1.47363  | -0.04454 |
| H | -0.41764 | 2.01768  | 0.43591  |
| H | 1.34567  | 1.97845  | 0.17845  |
| H | 0.23052  | 1.50422  | -1.12573 |



## ***N*-Phenylmaleimide(2)**

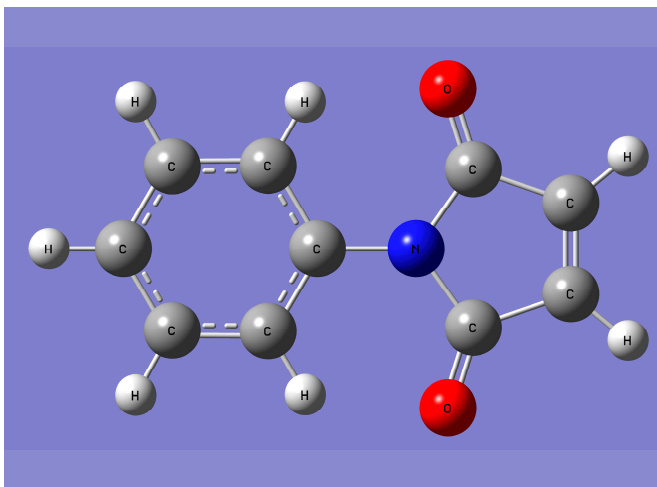

Calculation Type = FREQ

Calculation Method = RB3LYP

Basis Set = 6-31G(d,p)

Charge = 0

Spin = Singlet

Solvation = scrf=solvent=water

E(RB3LYP) = -587.23576 Hartree

RMS Gradient Norm = 6.6e-08 Hartree/Bohr

Temperature = 298.15 Kelvin

Pressure = 1 atm

Frequencies scaled by = 1

Electronic Energy (EE) = -587.23576 Hartree

Zero-point Energy Correction = 0.150857 Hartree

Thermal Correction to Energy = 0.160386 Hartree

Thermal Correction to Enthalpy = 0.16133 Hartree

Thermal Correction to Free Energy = 0.114807 Hartree

EE + Zero-point Energy = -587.08491 Hartree

EE + Thermal Energy Correction = -587.07538 Hartree

EE + Thermal Enthalpy Correction = -587.07443 Hartree

EE + Thermal Free Energy Correction = -587.12095 Hartree

E (Thermal) = 100.644 kcal/mol

Heat Capacity (Cv) = 37.562 cal/mol-kelvin

Entropy (S) = 97.917 cal/mol-kelvin

Symbolic Z-matrix:

Charge = 0 Multiplicity = 1

|   |          |          |          |
|---|----------|----------|----------|
| C | 1.59603  | -1.15994 | -0.01622 |
| C | 3.01362  | -0.66487 | -0.00952 |
| C | 3.01305  | 0.66641  | 0.01062  |
| C | 1.59507  | 1.16022  | 0.01577  |
| H | 3.84643  | -1.34763 | -0.0194  |
| H | 3.84529  | 1.34985  | 0.02159  |
| O | 1.2295   | -2.33409 | -0.02985 |
| O | 1.22711  | 2.33387  | 0.0299   |
| N | 0.7625   | -0.00029 | -0.00113 |
| C | -0.67254 | -0.00045 | -0.00018 |
| C | -1.38986 | -1.21078 | 0.03381  |
| C | -1.38954 | 1.21009  | -0.03432 |
| C | -2.78428 | -1.20165 | 0.03416  |
| H | -0.85001 | -2.14195 | 0.05294  |
| C | -2.78395 | 1.20138  | -0.03373 |
| H | -0.84971 | 2.14123  | -0.05437 |
| C | -3.49376 | -0.00004 | 0.00054  |
| H | -3.31439 | -2.1468  | 0.06073  |
| H | -3.3138  | 2.14668  | -0.06036 |
| H | -4.57709 | 0.00013  | 0.00086  |

### 1b Cat. (3)

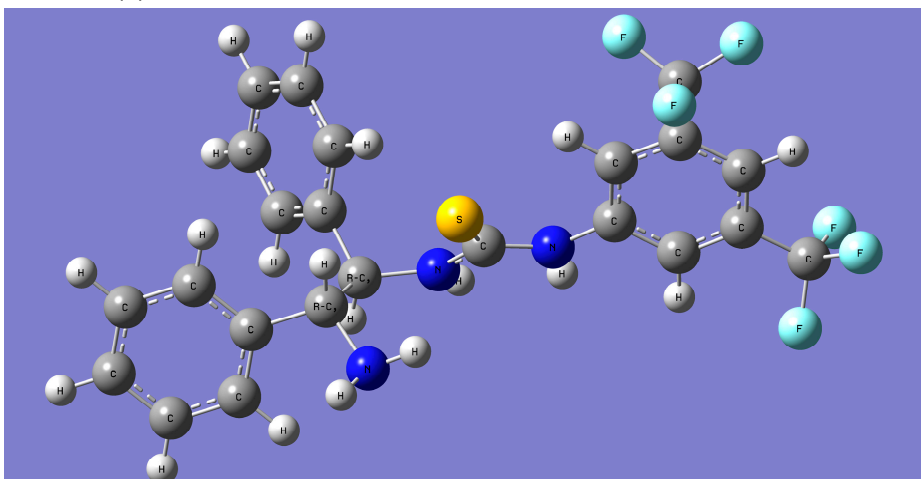

Calculation Type = FREQ

Calculation Method = RB3LYP

Basis Set = 6-31G(d,p)

Charge = 0

Spin = Singlet

Solvation = scrf=solvent=water

E(RB3LYP) = -2038.4563 Hartree

RMS Gradient Norm = 4.83e-07 Hartree/Bohr

Temperature = 298.15 Kelvin

Pressure = 1 atm

Frequencies scaled by = 1

Electronic Energy (EE) = -2038.4563 Hartree

Zero-point Energy Correction = 0.389951 Hartree

Thermal Correction to Energy = 0.419074 Hartree

Thermal Correction to Enthalpy = 0.420018 Hartree

Thermal Correction to Free Energy = 0.324348 Hartree

EE + Zero-point Energy = -2038.0664 Hartree

EE + Thermal Energy Correction = -2038.0373 Hartree

EE + Thermal Enthalpy Correction = -2038.0363 Hartree

EE + Thermal Free Energy Correction = -2038.132 Hartree

E (Thermal) = 262.973 kcal/mol

Heat Capacity (Cv) = 110.61 cal/mol-kelvin

Entropy (S) = 201.355 cal/mol-kelvin

Symbolic Z-matrix:

Charge = 0 Multiplicity = 1

|   |         |          |          |
|---|---------|----------|----------|
| C | 5.95702 | -2.0257  | -0.99747 |
| C | 5.31343 | -0.78977 | -1.15311 |
| C | 6.08417 | 0.35455  | -1.3923  |
| C | 7.4772  | 0.26852  | -1.46758 |
| C | 8.11327 | -0.96582 | -1.30522 |
| C | 7.34877 | -2.11364 | -1.07154 |
| H | 5.34877 | -2.90778 | -0.84029 |
| H | 5.59286 | 1.31319  | -1.51709 |
| H | 8.06328 | 1.16099  | -1.65527 |
| H | 9.19349 | -1.03345 | -1.36527 |
| H | 7.83615 | -3.07477 | -0.95197 |
| C | 3.89545 | 0.58264  | 1.1739   |
| C | 4.94237 | 0.48821  | 2.10013  |
| C | 5.41299 | 1.6259   | 2.76155  |
| C | 4.83664 | 2.8724   | 2.50476  |
| C | 3.78736 | 2.97356  | 1.5853   |
| C | 3.31822 | 1.83683  | 0.92364  |
| H | 5.39328 | -0.47753 | 2.30146  |
| H | 6.22394 | 1.53746  | 3.47528  |
| H | 5.19895 | 3.75603  | 3.01732  |
| H | 3.33395 | 3.93758  | 1.38433  |
| H | 2.50024 | 1.91008  | 0.21708  |
| C | 3.79434 | -0.70344 | -1.05643 |
| C | 3.40676 | -0.67122 | 0.45678  |
| N | 1.9588  | -0.92522 | 0.7652   |

|   |          |          |          |
|---|----------|----------|----------|
| N | 3.20105  | -1.93013 | -1.64968 |
| H | 3.90898  | -1.5372  | 0.89565  |
| H | 3.45423  | 0.22643  | -1.5242  |
| H | 3.5871   | -2.07576 | -2.59057 |
| H | 1.85504  | -1.45948 | 1.62979  |
| C | 0.82062  | -0.50323 | 0.18225  |
| C | -2.09556 | 0.64191  | 0.19432  |
| C | -3.45486 | 0.89091  | 0.02454  |
| C | -4.42239 | -0.08562 | 0.23553  |
| C | -3.98211 | -1.35313 | 0.6043   |
| C | -2.63084 | -1.6402  | 0.76007  |
| C | -1.66918 | -0.63958 | 0.56089  |
| H | -1.38016 | 1.43301  | 0.04259  |
| H | -5.49698 | 0.11274  | 0.11464  |
| H | -2.32892 | -2.64378 | 1.02737  |
| N | -0.31601 | -0.96901 | 0.80595  |
| H | -0.18708 | -1.68947 | 1.51789  |
| F | -5.87206 | -2.51813 | -0.24276 |
| F | -5.77538 | -2.18874 | 1.9346   |
| F | -4.40485 | -3.65399 | 0.98784  |
| F | -2.95742 | 3.20037  | -0.2284  |
| F | -4.0937  | 2.21453  | -1.85513 |
| F | -5.0932  | 2.6085   | 0.07102  |
| C | -4.99283 | -2.42396 | 0.82923  |
| C | -3.88315 | 2.22416  | -0.46421 |
| S | 0.74853  | 0.4812   | -1.26775 |
| H | 2.18444  | -1.80902 | -1.73222 |

## H<sub>2</sub>O

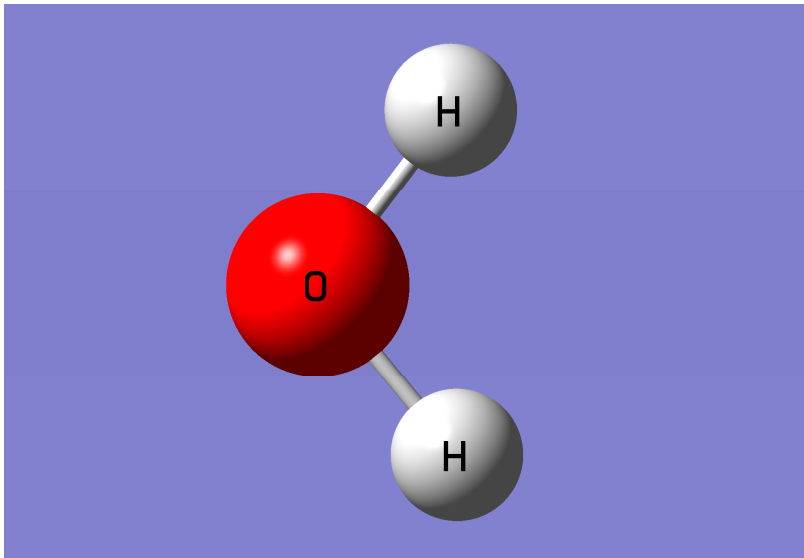

Calculation Type = FREQ

Calculation Method = RB3LYP

Basis Set = 6-31G(d,p)

Charge = 0

Spin = Singlet

Solvation = scrf=solvent=water

E(RB3LYP) = -75.981704 Hartree

RMS Gradient Norm = 0.000103805 Hartree/Bohr

Temperature = 298.15 Kelvin

Pressure = 1 atm

Frequencies scaled by = 1

Electronic Energy (EE) = -75.981704 Hartree

Zero-point Energy Correction = 0.019862 Hartree

Thermal Correction to Energy = 0.022697 Hartree

Thermal Correction to Enthalpy = 0.023641 Hartree

Thermal Correction to Free Energy = 0.002118 Hartree

EE + Zero-point Energy = -75.961842 Hartree

EE + Thermal Energy Correction = -75.959007 Hartree

EE + Thermal Enthalpy Correction = -75.958063 Hartree  
EE + Thermal Free Energy Correction = -75.979586 Hartree  
E (Thermal) = 14.243 kcal/mol  
Heat Capacity (Cv) = 5.998 cal/mol-kelvin  
Entropy (S) = 45.3 cal/mol-kelvin

Symbolic Z-matrix:

Charge = 0 Multiplicity = 1

|   |          |         |    |
|---|----------|---------|----|
| O | -2.30435 | 1.26087 | 0. |
| H | -1.34435 | 1.26087 | 0. |
| H | -2.6248  | 2.16581 | 0. |

TS

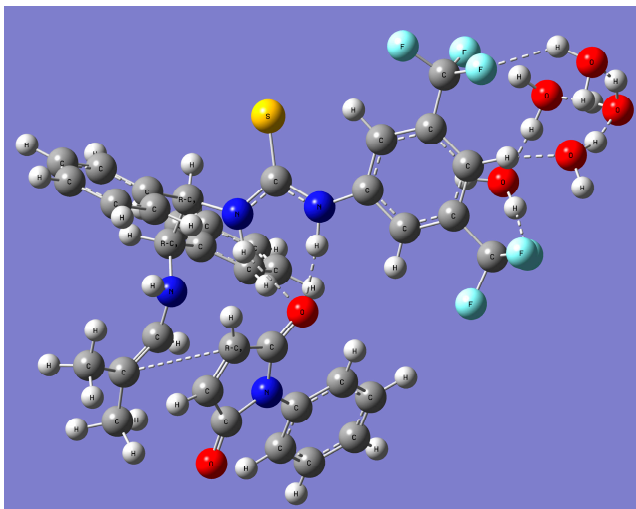

Calculation Type = FREQ

Calculation Method = RB3LYP

Basis Set = 6-31G(d,p)

Charge = 0

Spin = Singlet

Solvation = scrf=solvent=water

E(RB3LYP) = -3160.9918 Hartree

RMS Gradient Norm = 8.18e-07 Hartree/Bohr

Temperature = 298.15 Kelvin

Pressure = 1 atm

Frequencies scaled by = 1

Electronic Energy (EE) = -3160.9918 Hartree

Zero-point Energy Correction = 0.757812 Hartree

Thermal Correction to Energy = 0.813916 Hartree

Thermal Correction to Enthalpy = 0.81486 Hartree

Thermal Correction to Free Energy = 0.659441 Hartree

EE + Zero-point Energy = -3160.234 Hartree

EE + Thermal Energy Correction = -3160.1779 Hartree

EE + Thermal Enthalpy Correction = -3160.177 Hartree



EE + Thermal Free Energy Correction = -3160.3324 Hartree

E (Thermal) = 510.74 kcal/mol

Heat Capacity (Cv) = 209.564 cal/mol-kelvin

Entropy (S) = 327.108 cal/mol-kelvin

Symbolic Z-matrix:

Charge = 0 Multiplicity = 1

|   |         |          |          |
|---|---------|----------|----------|
| C | 2.67135 | -0.37866 | 2.27695  |
| C | 3.46932 | 0.7741   | 2.32576  |
| C | 4.01466 | 1.16863  | 3.55649  |
| C | 3.76706 | 0.43327  | 4.71773  |
| C | 2.97651 | -0.71749 | 4.66011  |
| C | 2.43376 | -1.12065 | 3.43705  |
| H | 2.23258 | -0.70878 | 1.34584  |
| H | 4.64036 | 2.05392  | 3.60405  |
| H | 4.19706 | 0.75284  | 5.65985  |
| H | 2.78972 | -1.29634 | 5.5571   |
| H | 1.82883 | -2.01824 | 3.37907  |
| C | 2.97449 | 3.69365  | -0.1753  |
| C | 3.74277 | 4.75668  | 0.32284  |
| C | 4.22791 | 5.74413  | -0.53557 |
| C | 3.95166 | 5.68035  | -1.9057  |
| C | 3.18164 | 4.62889  | -2.40687 |
| C | 2.69178 | 3.64124  | -1.54538 |
| H | 3.95657 | 4.81431  | 1.38547  |
| H | 4.81625 | 6.5626   | -0.13738 |
| H | 4.32856 | 6.44641  | -2.573   |
| H | 2.95575 | 4.57715  | -3.46564 |
| H | 2.07471 | 2.84179  | -1.93635 |
| C | 3.73623 | 1.64744  | 1.10737  |
| C | 2.52633 | 2.59581  | 0.79248  |

|   |          |          |          |
|---|----------|----------|----------|
| N | 1.4668   | 1.74626  | 0.24901  |
| N | 4.00052  | 0.84791  | -0.13506 |
| H | 2.175    | 3.04869  | 1.72236  |
| H | 4.59319  | 2.29492  | 1.33384  |
| H | 1.82661  | 0.89845  | -0.19711 |
| C | 0.1343   | 1.94905  | 0.36347  |
| C | -2.98852 | 1.60667  | 0.00795  |
| C | -4.32    | 1.25505  | -0.21104 |
| C | -4.69608 | 0.02995  | -0.75013 |
| C | -3.66877 | -0.86185 | -1.06217 |
| C | -2.33406 | -0.54837 | -0.85315 |
| C | -1.9686  | 0.70173  | -0.31486 |
| H | -2.74146 | 2.57397  | 0.414    |
| H | -5.74605 | -0.23964 | -0.95571 |
| H | -1.5656  | -1.26447 | -1.11491 |
| N | -0.59247 | 0.91882  | -0.17128 |
| S | -0.50681 | 3.38302  | 1.13564  |
| H | -0.01959 | 0.12482  | -0.50294 |
| F | -5.00827 | -2.15595 | -2.5483  |
| F | -4.52801 | -3.04714 | -0.5919  |
| F | -2.93743 | -2.85411 | -2.12265 |
| F | -4.91467 | 3.50705  | 0.24341  |
| F | -6.47204 | 2.16958  | -0.63433 |
| F | -5.86997 | 1.9532   | 1.48192  |
| C | -4.019   | -2.20461 | -1.59459 |
| C | -5.37239 | 2.21924  | 0.20243  |
| C | 2.12938  | -1.47314 | -1.46164 |
| C | 3.68678  | -1.28128 | -3.14593 |
| C | 4.03995  | -2.4621  | -2.29753 |
| O | 1.15575  | -1.20941 | -0.72425 |
| C | 2.57708  | -0.71421 | -2.66633 |

|   |          |          |          |
|---|----------|----------|----------|
| O | 4.98727  | -3.23266 | -2.42183 |
| N | 3.01586  | -2.53797 | -1.28167 |
| H | 2.04071  | 0.14572  | -3.02994 |
| H | 4.07898  | 1.47879  | -0.93913 |
| C | 5.05025  | -0.10902 | -0.07585 |
| C | 6.07951  | -0.24033 | -0.93432 |
| C | 6.38763  | 0.71708  | -2.07009 |
| C | 7.04461  | -1.4     | -0.79066 |
| H | 4.94762  | -0.80391 | 0.75057  |
| H | 7.39575  | 1.13153  | -1.93467 |
| H | 6.38028  | 0.19772  | -3.03634 |
| H | 5.68601  | 1.55415  | -2.12948 |
| H | 6.90336  | -2.11293 | -1.61476 |
| H | 8.08295  | -1.04648 | -0.8205  |
| H | 6.88369  | -1.93856 | 0.14951  |
| H | 4.28026  | -0.99785 | -3.99798 |
| O | -8.51282 | -1.27177 | 0.74586  |
| H | -7.80545 | -1.02147 | 1.49375  |
| H | -8.9445  | -0.39523 | 0.4263   |
| O | -7.35031 | -0.95339 | -1.38066 |
| H | -7.17521 | -1.65982 | -2.05026 |
| H | -7.78112 | -1.33992 | -0.43332 |
| O | -6.69572 | -0.62583 | 2.40492  |
| H | -5.89955 | -1.28357 | 2.30299  |
| H | -6.37643 | 0.27083  | 2.12687  |
| O | -4.70943 | -2.23599 | 2.06595  |
| H | -3.83727 | -1.84166 | 2.32264  |
| H | -4.62985 | -2.53607 | 1.12016  |
| O | -9.03486 | 0.83283  | -0.73073 |
| H | -8.4381  | 0.2015   | -1.2972  |
| H | -8.38917 | 1.52306  | -0.41957 |

|   |         |          |          |
|---|---------|----------|----------|
| C | 2.93846 | -3.53536 | -0.25208 |
| C | 1.72242 | -3.78625 | 0.40676  |
| C | 4.07623 | -4.27906 | 0.10316  |
| C | 1.65584 | -4.75644 | 1.40703  |
| H | 0.84636 | -3.21365 | 0.15208  |
| C | 3.99335 | -5.24841 | 1.10283  |
| H | 5.00522 | -4.11738 | -0.41731 |
| C | 2.78786 | -5.49248 | 1.76309  |
| H | 0.70976 | -4.93605 | 1.90397  |
| H | 4.88099 | -5.81299 | 1.36274  |
| H | 2.73047 | -6.24493 | 2.54016  |

## 4. References

1. Miura, T.; Masuda, A.; Ina, M.; Nakashima, K.; Nishida, S.; Tada, N.; Itoh, A. Asymmetric Michael reactions of  $\alpha$ ,  $\alpha$ -disubstituted aldehydes with maleimides using a primary amine thiourea organocatalyst. *Tetrahedron Asymmetry* **2011**, *22*, 1605–1609.
2. Bai, J.F.; Peng, L.; Wang, L.L.; Wang, L.X.; Xu, X.Y. Chiral primary amine thiourea promoted highly enantioselective Michael reactions of isobutylaldehyde with maleimides. *Tetrahedron* **2010**, *66*, 8928–8932.
3. Ma, Z.-w.; Liu, Y.-x.; Li, P.l.; Ren, H.; Zhu, Y.; Tao, J.C. A highly efficient large-scale asymmetric Michael addition of isobutylaldehyde to maleimides promoted by a novel multifunctional thiourea. *Tetrahedron: Asymmetry* **2011**, *22*, 1740–1748.
4. Yu, F.; Jin, Z.; Huang, H.; Ye, T.; Liang, X.; Ye, J. A highly efficient asymmetric Michael addition of  $\alpha$ ,  $\alpha$ -disubstituted aldehydes to maleimides catalyzed by primary amine thiourea salt. *Org. Biomol. Chem.* **2010**, *8*, 4767–4774.
5. Xue, F.; Liu, L.; Zhang, S.; Duan, W.; Wang, W. A simple primary amine thiourea catalyzed highly enantioselective conjugate addition of  $\alpha$ ,  $\alpha$ -disubstituted aldehydes to maleimides. *Chem. Eur. J.* **2010**, *16*, 7979–7892.
6. Kokotos, C.G. An Asymmetric Michael Addition of  $\alpha$ ,  $\alpha$ -Disubstituted Aldehydes to Maleimides Leading to a One-Pot Enantioselective Synthesis of Lactones Catalyzed by Amino Acids. *Org. Lett.* **2013**, *15*, 2406–2409.
7. Ma, Z.W.; Liu, X.F.; Liu, J.T.; Liu, Z.J.; Tao, J.C. Highly enantioselective Michael addition of  $\alpha$ ,  $\alpha$ -disubstituted aldehydes to maleimides catalyzed by new primary amine-squaramide bifunctional organocatalysts. *Tetrahedron Lett.* **2017**, *58*, 4487–4490.
